# Supplementary material for: Fitness variation across subtle environmental perturbations reveals local modularity and global pleiotropy of adaptation
Source: eLife. 2020 Dec 2;9:e61271. doi: 10.7554/eLife.61271 (PMC7880691; doi:10.7554/eLife.61271)
Supplement: Figure 2—source data 1. — This table shows the fitness measurement data of each barcoded mutant in all the 45 environments. This includes the final fitness estimate for each environment (a weighted average of the replicates) as well as the fitness estimate in each replicate (e.g. denoted by ‘-R1’ to indicate replicate 1). The error for each fitness estimate is also included, in units of standard deviations. Mutants are classified by their putative causal mutation (see ‘Classifying mutations by mutation type’ in methods). Any additional mutations identified in Venkataram et al., 2016a are also listed. [file elife-61271-fig2-data1.csv]

barcode	gene	type	ploidy	class	additional_muts	mutation_type	EC Batch 19_fitness	EC Batch 19_error	EC Batch 3_fitness	EC Batch 3_error	EC Batch 6_fitness	EC Batch 6_error	EC Batch 13_fitness	EC Batch 13_error	EC Batch 18_fitness	EC Batch 18_error	EC Batch 20_fitness	EC Batch 20_error	EC Batch 21_fitness	EC Batch 21_error	EC Batch 23_fitness	EC Batch 23_error	12 hr Ferm_fitness	12 hr Ferm_error	8 hr Ferm_fitness	8 hr Ferm_error	22 hr Ferm_fitness	22 hr Ferm_error	18 hr Ferm_fitness	18 hr Ferm_error	1 Day_fitness	1 Day_error	3 Day_fitness	3 Day_error	4 Day_fitness	4 Day_error	5 Day_fitness	5 Day_error	6 Day_fitness	6 Day_error	7 Day_fitness	7 Day_error	0.5% DMSO_fitness	0.5% DMSO_error	8.5 μM GdA (B1)_fitness	8.5 μM GdA (B1)_error	Baffle, 1.4% Gluc_fitness	Baffle, 1.4% Gluc_error	Baffle (B8)_fitness
53	Diploid	Diploid	Diploid	Diploid	TIP1-upstream_point_variant; YKR012C-upstream_indel_variant; APM2-upstream_indel_variant; RPL11B-upstream_indel_variant; YIL161W-upstream_indel_variant; YIL169C-frameshift_variant	Diploid	0.2897195678494313	0.031252055893297125	0.3239193953260771	0.045242087110306764	0.1651984025868033	0.07516463627235118	0.2604812895018688	0.034492893640720536	0.34022764913859954	0.0348629701649213	0.475085743933185	0.055648664107036984	0.42268495178648063	0.033918885619702716	0.4677213618473895	0.033554000926316975	0.2157698605684885	0.037287506327138766	0.11746332958023788	0.05233863854029043	0.4130075738343983	0.053274635672470254	0.4234164389683924	0.03843235330991762	0.3004957077334785	0.06173212114900136	0.3395889214353798	0.09764670354914716	0.533692685991776	0.0933080328334224	0.5878668397534357	0.054177716212295744	0.8705199968854417	0.06982241579887079	0.059552009478596665	0.1127961752639592	0.3073168306424837	0.03730080386273325	0.31197070910034136	0.06431218145277165	0.5562625084669397	0.04875602551165654	0.5648298558036692
151	IRA1	stop_gained	Haploid	PKA	SEH1-missense_variant; ZIP1-missense_variant; MIM1,tS-upstream_indel_variant; YFL019C,SUF9-upstream_indel_variant	IRA1_nonsense	1.4016427713517787	0.01798190659902505	1.1809014824495458	0.02134607470785823	1.4133062576530866	0.0320396901573863	1.460395828145945	0.019769434898330367	1.1979433415312466	0.023814061947805932	0.9895508758181956	0.05039043610305181	0.9332993883895712	0.028010140182560227	1.057368353343472	0.02982429666134233	1.436496567493757	0.019396218092093208	1.1104275698240074	0.02650667313491812	1.4479100187789942	0.030836781157032787	1.5916912439111903	0.02569219326028641	0.5685065500094404	0.050972066976556964	1.501074365680133	0.025895593610490056	1.5559327383675097	0.049054507342106014	1.1353726105465485	0.04420158296272159	0.5183713636325727	0.066495044753625	-1.0844907876918657	0.10144889295004006	1.0421043784316002	0.028376423424046424	1.1841223789642468	0.05584282453814656	1.553902724281919	0.018647317223159324	1.4784249633515636
262	NotSequenced	NotSequenced	NotSequenced	NotSequenced	NotSequenced	NotSequenced_adaptive	0.1302718240961546	0.0225655162490056	0.13908496025833095	0.030740066134003013	0.059790446776026976	0.04785336899431256	0.10954745102170413	0.02571265609673461	0.1619688158029409	0.02756086672310148	0.3901633090053138	0.05718973526489679	0.4807882781587518	0.03537771882823106	0.44716409502885707	0.034312002670621136	0.0694716267117742	0.025818803473275285	0.08167111781479443	0.03468824378147289	0.3588537381139565	0.03949134354457174	0.2685650810247101	0.03043787048799022	0.29864282330020864	0.05425377634411655	0.1667267477422908	0.061347343588512265	0.3474758041902135	0.06749337789720967	0.4126741931123925	0.04949146071521485	0.5749363274847615	0.06971113850799901	0.0038020998525986624	0.1043192739608421	0.16491521107119406	0.0316901246653915	0.13162033547233046	0.058792293732881085	0.3627271659288697	0.036943129465531424	0.3878585183278017
273	IRA1	frameshift_variant	Haploid	PKA	None	IRA1_nonsense	0.99827246182509	0.018021615867361847	0.824757360581081	0.021403094741759842	0.8440019136928277	0.03207093250496347	1.0450723454888668	0.01981280997815067	0.9285629496710196	0.023835653902733043	0.8389501546787915	0.05145765120876429	0.8522981126700591	0.02879492361698891	0.8936697516183175	0.03031043760165757	0.9618972635463424	0.01943114970155164	0.7240403206515876	0.026590095763827103	0.9371222297167074	0.0310263143612912	1.1365687367370356	0.025729566604628686	0.5302904247428117	0.05098549157716272	0.999479818592152	0.02594424049036195	0.9916691704706464	0.049075537972834204	0.8165833630380639	0.044222029181950895	0.5928585652935191	0.06650427978081218	-1.1287982283483655	0.10158388090239903	0.6779971964481896	0.028409789439801526	0.7607270311508139	0.05587641598017677	0.9274824162491244	0.019505195433007237	0.9128481428893436
323	NotSequenced	NotSequenced	NotSequenced	NotSequenced	NotSequenced	NotSequenced_adaptive	0.892173300603244	0.0180922783571982	0.8577832487540076	0.02146519162232149	0.8727798040178966	0.03210048433188786	0.9411232985536212	0.01988211546671647	0.8811477490635731	0.023888563539103187	0.7384822813653835	0.050875046961167895	0.8439593902720889	0.028447950548620045	0.8248125325842889	0.030067213239919982	0.914085317855518	0.019483937222059763	0.7391040467309282	0.02667005064804633	0.8747276895434122	0.03128738394192832	1.0832346258867884	0.02578986827221167	0.2285122932041358	0.051030914432804775	1.1492477028047858	0.025957983928732626	1.5008042907231076	0.04906786871920836	1.4232771851515105	0.044201169546082365	1.4630674860237844	0.06648128640400082	-0.5369840487619824	0.1009197123948756	0.6198814065115921	0.02848533079206628	0.7358157460133026	0.05591808563481588	1.003728358229649	0.019962376825396297	0.9289998523966584
415	IRA1	frameshift_variant	Haploid	PKA	None	IRA1_nonsense	1.0951337595952009	0.01860596262264591	1.1926800912692117	0.021598704717446	1.1785927889032737	0.032190016401961286	1.16984636058852	0.02039361171317608	1.0863651846242588	0.024309632802776017	0.9488933469618182	0.05096919352654917	1.0957770120995212	0.02860763217004478	1.036958936321042	0.030034365583319737	1.3271236177878891	0.01973017988312904	1.034257689188211	0.027377758619753303	0.6258739604214786	0.036412041754238185	1.3526871831274	0.026382793169370557	0.8534125881380692	0.051214901302249205	0.9920608539577032	0.02662787244147301	0.2443609294836673	0.05348158214826649	-0.9457712386642788	0.08188020377339528	-0.4599886851826976	0.1212167488747422	-0.942219787219054	0.2635740732432039	0.9200835526126404	0.029003984585963663	0.9613637264808296	0.0564192909241434	1.0191010761746295	0.02766314365345571	0.9378365354138436
689	IRA1	frameshift_variant	Haploid	PKA	RPL19A-upstream_point_variant	IRA1_nonsense	1.1130501640547918	0.018306454062574702	1.2041448023489276	0.02146883771266415	1.1212055604925182	0.032138631559689844	1.1640908821843092	0.020105623973131453	1.0517600441057766	0.024130559095092048	1.0480880887362936	0.05239850790584783	0.9169497446062512	0.029312048916660064	0.9909794515623128	0.03165698583634086	1.2585265481197894	0.019604616612107904	0.9921516785892532	0.02711174801520789	0.392410691428511	0.036482783340770805	1.280917997447622	0.02608548296786706	0.8487026189840989	0.05108125941071776	0.8697689060244426	0.026414077494111024	0.1625023299042233	0.05314314911639829	-0.6875793574872464	0.06518845099117965	-0.7772124735344431	0.11458656268949265	-1.0039938928270062	0.25414101661445154	0.9178879053176546	0.02860694087408401	0.9756562860983948	0.056074404319401035	0.9593104050631468	0.02498762137263629	0.8989301166781926
697	NotSequenced	NotSequenced	NotSequenced	NotSequenced	NotSequenced	NotSequenced_adaptive	0.19810684991846803	0.028213772884986638	0.3309132502078377	0.03926026928469021	0.1860976194648876	0.06494620993043933	0.1639960076683348	0.03177670984149165	0.25663911862908656	0.03380316933570942	0.4554177222093314	0.05489496980962827	0.3884708448564019	0.033147569659862375	0.3959617031814521	0.03324207467252748	0.12620589289755585	0.034022662812798914	0.09578150182103534	0.045708075153502906	0.3948318485568176	0.04888898003609026	0.3489575267453399	0.03681011086596206	0.3741920953530457	0.05869944336710173	0.40599589512739737	0.08190557864440137	0.5235308114547078	0.08348517146893412	0.5579835936509076	0.05280291223291317	0.6511340871853578	0.07230219566734906	0.06303837976220975	0.11188586742057292	0.2558678982387557	0.03567426017951016	0.2667628840711924	0.0623090932111522	0.5657388525717032	0.04641379457096382	0.38978800001206093
1379	NotSequenced	NotSequenced	NotSequenced	NotSequenced	NotSequenced	NotSequenced_adaptive	1.2753404592805382	0.017975099403098802	1.144038605428143	0.0213296093297287	1.2439418915548133	0.03203903729485918	1.3140129360350383	0.01976207357231625	1.102380275459643	0.023810285213141203	1.0751295442389746	0.050457792177114616	0.9538210562051908	0.02803250584627424	1.1178955391447152	0.029841480028912494	1.3892766129549952	0.01939078659960933	1.1056468560811696	0.02648471183627788	0.7315787518919817	0.030985398270408783	1.4251390920053588	0.02568845550059828	0.7384829031947633	0.05096977423932119	1.0056213940913616	0.02591063427314024	0.5365064528299045	0.049116618240704187	0.07750209427852446	0.04441991238574017	-0.8601306515589944	0.06805940475610807	-1.2729878292870849	0.10847473800629208	1.0047695114432829	0.02836308640528173	1.1057610679656371	0.05583095024213197	1.2472564781507631	0.01882207395354102	1.207404194870324
1488	NotSequenced	NotSequenced	NotSequenced	NotSequenced	NotSequenced	NotSequenced_adaptive	1.1872433113563703	0.018075951759901284	1.1721999734608606	0.021389689585109808	1.169699716753874	0.03207261616975095	1.1713948803326166	0.01988893442726709	1.078399685425338	0.023915235933452864	1.0668913175004957	0.051012964565010775	0.8533806701088195	0.028376785489017505	1.0179449803459988	0.03015051350839153	1.2771661857428869	0.019472690068958583	0.9907720589493996	0.026724295902392812	0.5933739829699965	0.03250708567062284	1.327163908516949	0.02583459529081962	0.8576765780459813	0.051007881748931526	0.9635391509083152	0.0260645960597931	0.3880595920317108	0.04983142059095395	-0.12994169445651016	0.04699261620515082	-0.2799015542071693	0.07845321438890925	-1.046396136370925	0.15660652727138233	0.8759253285062404	0.02845324315691305	1.0179839733701694	0.055914961844916115	0.9944586724493344	0.02067064146550795	0.9611457391629472
1564	Diploid	Diploid	Diploid	Diploid	None	Diploid	0.17461937161258315	0.032013364248762534	0.32077771993782705	0.04476296046789021	0.12363504722185108	0.0811831598634535	0.1576986528054174	0.03506883182788189	0.23790749049843676	0.034872170554152364	0.38780963301975496	0.05798961427138182	0.5059164164957313	0.03595313890525309	0.4361956350228397	0.034454796207306716	0.13024875200800454	0.03737902508589792	0.1294140788620979	0.05095518248740007	0.5087893934393971	0.0497318884769476	0.3464380479410713	0.039628878450074616	0.4742607334858248	0.06047032336099185	0.1717058172215256	0.1121153005685262	0.4512212606355983	0.09661260089757866	0.3794467226066732	0.061671319254423665	0.5843179265584232	0.07487103817720543	0.18399125941526015	0.11455049202216493	0.290953846156054	0.038339252154361465	0.275710148570266	0.065009664505387	0.5641682458080102	0.044476558424596635	0.4289955397084956
1617	PDE2	frameshift_variant	Haploid	PKA	RIF1-upstream_indel_variant	PDE2	0.8420688132749895	0.018688851518367657	0.8108684527172532	0.021988087642803758	0.7389586214601057	0.03241513971671128	0.9265410510109832	0.02043527790006348	0.8246806103156845	0.024202182914138348	0.8024007356263193	0.05234358881426434	0.3978891704850071	0.029844431908230582	0.7259133832491468	0.03149490274436415	0.8505608910522414	0.020034802688256744	0.6923608664728049	0.027927625476318413	0.9797362688716172	0.03261975441211073	1.088134126307999	0.026349051183963444	0.6959525522029769	0.05105235669086189	0.9073505253957792	0.026566526277484345	1.1609442447154723	0.049184130056926914	1.1405603206284796	0.044300997733996664	1.128153134716516	0.06653368956321394	-0.3043033723637646	0.1016972582321458	0.6499097645660328	0.02888020426453749	0.6796918114633493	0.056469811478180934	0.7100365283560125	0.022867081946303915	0.7775059102486924
1641	other	other	other	other	nan-nan	other	-0.0479445432098497	0.030404794700887583	-0.004768608175317583	0.04375714472691036	-0.02993813493647025	0.07090628678513071	0.013569101864067436	0.03483604448180688	-0.048889209551042936	0.037687732404476114	0.011205446682548059	0.0612493934090345	0.03471635414964688	0.04025641301260985	0.011895320407801314	0.038223293596716605	0.008263915084729078	0.03632674281493232	-0.01141873178711625	0.04603028607955115	-0.11207260127134358	0.05961290887037455	0.025486436117039667	0.041816208054206536	-0.01030253629437208	0.06698342201714498	0.1592711080719801	0.09175156196741756	0.30458308661976746	0.10646935864004588	0.02805908447993822	0.06837175660706186	-0.01563994170647682	0.09344449150458316	0.07010166363713592	0.11100094080858022	0.03040420874040993	0.03891698160221045	-0.007462587670425138	0.06737795934637157	-0.034039407494901336	0.08395884690077468	0.15682629477025373
1683	other	other	other	other	SDH3-upstream_point_variant; MFM1-missense_variant; YIL169C-frameshift_variant	other	0.021953004465211114	0.039762676238865334	-0.10769499303703284	0.057751763421187235	-0.01689318334426234	0.1090631353324156	-0.0599943495923216	0.045452924904916515	-0.013795187947507451	0.04921833893365084	0.06885096031933459	0.0603962203755035	-0.05138897064266958	0.038537954851454635	0.015973170352224918	0.03878185983785035	-0.03812543073053646	0.0504350757941427	-0.02538980078895661	0.0578210487495599	-5.4206998433368455e-05	0.07210538875992249	-0.04110839716054983	0.0580591947095178	0.0011724295817829415	0.07965860213123724	-0.02008671837969305	0.17781454502108346	-0.32609055205762033	0.19185965524189494	0.0332813257335382	0.08727470474734482	-0.08411452931931633	0.11257632054449884	-0.13240153577245753	0.1378049925798129	0.04344665392172558	0.04556808679439103	0.022064114057359408	0.07452753478396608	0.05261146701263068	0.10801439030629124	0.054830424092677466
1866	PDE2	stop_gained	Haploid	PKA	None	PDE2	0.7071505201209208	0.020053107893839062	0.8721973040248295	0.022932555192844088	0.6562020232712842	0.03360780676305942	0.7509086406690645	0.021721056020345242	0.763909901058531	0.02506672645335841	0.675820878233919	0.05312813759667676	0.5917407870596075	0.030879240288786164	0.6642132337507377	0.03150836197763498	0.7337632374583368	0.021292684583490002	0.5770480866686116	0.030361946864526475	0.6238759110489563	0.03828660117706987	0.8233306388671269	0.027592988994785714	0.5936168807132522	0.051350213673972994	0.8672125225824023	0.02834669551518108	1.1314851966270572	0.04963712991761325	1.0087723747131447	0.04448248325954232	1.046377514864482	0.06671392503577016	-0.3848288268535757	0.10383614432039152	0.5892770833317141	0.0304045848191697	0.6083811348113602	0.057679695251500025	0.688930711853572	0.029325489023072263	0.7304848696194237
2037	Diploid	Diploid	Diploid	Diploid	None	Diploid	0.2847640965793583	0.02792779210695729	0.2784009235837639	0.04060444159664305	0.061198850819066834	0.06369336851029396	0.2862750953635314	0.030006289788398824	0.3203564185354075	0.031175983691005313	0.5173067982954439	0.054523566436548036	0.33865656821148776	0.03250405042929555	0.4728109712693262	0.03317393975146638	0.218854906093244	0.03196439833835808	0.1888089646015268	0.04410532319660971	0.4789629310639757	0.04837700440221264	0.37035582308979104	0.03638698553757578	0.4347335287864926	0.057770088524648565	0.1897845264203531	0.0893821029084795	0.475294838091851	0.0776832759218502	0.5436783719633611	0.054348926655091216	0.7538409584849877	0.06988735848617512	0.05368058951048352	0.11196942285688584	0.2565714907609551	0.03426254498158608	0.26324822773486944	0.06184025352347775	0.4796130368169216	0.03919395447441395	0.5081693231664112
2039	Diploid + IRA2	frameshift_variant	Diploid	Adaptive Diploid	ACF2-missense_variant	Diploid + IRA2	0.6405201443441593	0.02123135728835904	0.6420859977046275	0.02550733865372897	0.5419377291298126	0.03559162315333469	0.6132774712507391	0.022870910198149217	0.7693130987083037	0.025447913708411526	0.6758546827741719	0.055084039716830464	0.7278211479071031	0.032687316519999926	0.6866371283953718	0.03255764197347273	0.5707256489942143	0.02237641190304621	0.4607982076817404	0.030931063645173583	0.6472845649204672	0.0386625763460254	0.7751318948304243	0.02808817740894893	0.3731827921859222	0.05231387696664933	0.8823149345370372	0.02924140331138206	1.3108777896614978	0.04976645592827266	1.358393453170043	0.04431773137361621	1.7070120260195478	0.06651134330326577	0.36735384426986745	0.10119815617736254	0.6830446280529182	0.029481305073325	0.7342801434974634	0.056658112987135675	0.8505633451572846	0.027780143687662896	0.8125109128602165
2288	GPB2	stop_gained	Haploid	PKA	TAF9-upstream_point_variant; SHE3-missense_variant; APE3-synonymous_variant	GPB2	0.8172668712601658	0.018846850509281848	0.7655362040201811	0.022455330412337784	0.8011709930044421	0.03254352475992417	0.8842002221937854	0.020766793236944518	0.8046231627016789	0.024490649216112468	0.6925316261358708	0.05161483705273415	0.8814186797462582	0.02915731434942028	0.811325046186078	0.030413210436142906	0.8819675461889804	0.020045929216551458	0.6980611566510443	0.027696707718948037	0.7909313408997528	0.03348152779014623	0.9856011820484416	0.026516624091649812	0.2726694112079001	0.05152806189329673	1.0226216347762829	0.02650289505243001	1.22376129712403	0.0492518714614118	1.107706724566359	0.04427718963990995	1.0097745944627208	0.06654948333980333	-0.6654807977920093	0.10312452929436657	0.6083083614554747	0.02935111942128849	0.6744035381302966	0.056519131101695985	0.9252145908742512	0.02727433235514023	0.9279347681657988
2608	GPB1	frameshift_variant	Haploid	PKA	OSH2-missense_variant	GPB1	0.5412638110405665	0.022037228709783398	0.5424470993171119	0.02759334336735985	0.4111748065336481	0.037723405850244536	0.4665520422252005	0.025142361936103697	0.5682606667625958	0.02615189072485285	0.4924501456784678	0.05366604415129372	0.5022073708683004	0.031361538975148484	0.5178303504295686	0.031766448270220564	0.4382603888223677	0.02517540163974237	0.2852591874201718	0.036008726993504526	0.5584095315005142	0.04107399253160313	0.6091678663807709	0.02981829565527262	0.4360084261059416	0.052902340887390514	0.4932626652375226	0.039511395658218935	0.7255336741492946	0.05344212236574576	0.5477136640469709	0.04787136323674465	0.6284993018285099	0.06982108453941631	0.15370157810817872	0.10449412701933496	0.4322905640849437	0.03236091862578706	0.43372303724210215	0.05950814572451649	0.6158080581207087	0.04607375673125524	0.4859663044764962
2768	GPB2	stop_gained	Haploid	PKA	DUS1-missense_variant	GPB2	0.9142609972694868	0.018125417615710508	0.7375426601997215	0.021544659458757144	0.7881774576891775	0.032125147009810666	0.95671020472894	0.019928308340299104	0.843443425699136	0.02392200951999657	0.8378644688457516	0.05132474028111367	0.7385378470431728	0.028632064666578437	0.8781025327403378	0.030389234714371095	0.9055221785639924	0.01950047700012564	0.7280765349716156	0.026707365214807016	0.8420211578552574	0.03145919995417108	1.0460819148053966	0.025840439101271352	0.24937491232616876	0.05106044112857799	0.9960847687604164	0.02600864492063567	1.2110571391833824	0.04908243059633916	1.1467465306295723	0.044213523710529626	0.9878071051521252	0.06649006183133474	-0.5049181433468543	0.10119480423824062	0.6187801265344186	0.028478594041711908	0.7154008810040446	0.05593784117925902	0.9732406854616052	0.02006854492951806	0.9447681889369602
2776	Diploid	Diploid	Diploid	Diploid	SWH1-missense_variant	Diploid	0.1319847728669431	0.031787938940264104	0.3697951587791569	0.0446790461212443	0.2383042807136379	0.07350469982755907	0.16020421392811168	0.03580714259742986	0.27691609629811803	0.034702696801952995	0.31330942128080946	0.059763029799509024	0.6784114259590246	0.0382594421678794	0.4435167337135413	0.03435654058688541	0.08758181046924886	0.038213088585464836	0.12927805130706108	0.04993733303692832	0.3944795616048412	0.05039193451272797	0.3737588304918357	0.03800856475952364	0.4184893714017968	0.05813472245301226	0.4525464299449666	0.09364577870686804	0.5130333949446915	0.08962736563320896	0.4929539338152141	0.057987614222034876	0.7337547691653448	0.0735659789557403	0.05123707219555795	0.11165914001094447	0.32072055897421664	0.040830733063789384	0.2381226214223443	0.06643140234690212	0.5691044634086342	0.053728441170552484	0.4991491828509221
2808	Diploid	Diploid	Diploid	Diploid	CDC39-missense_variant	Diploid_adaptive	0.299072780946949	0.023246869732557147	0.3896893366639003	0.030467901808726064	0.1963276327894032	0.04652542640673294	0.23802576757052016	0.025972999789489568	0.39171086184390375	0.02785653594608699	0.5350128104325489	0.05464178173902625	0.4903930457634757	0.03262891848404242	0.5231146524603542	0.032875872778713094	0.1958132023993424	0.02671093999011613	0.10473866287522644	0.039417209582241305	0.6257666279782854	0.0365441128181344	0.4394235079074362	0.030575662437833686	0.4564230640428989	0.05324852348478478	0.4023353398453304	0.0521332440886454	0.7379058436781996	0.0577917702299466	0.8035475395242218	0.045815498897857326	0.9636176361208496	0.06753206621169126	0.6982105185403873	0.10147583268361954	0.2984680239630708	0.0336577093509671	0.318005314288667	0.060745084034161886	0.5708429501669705	0.03153260002113674	0.5533744752392669
3250	NotSequenced	NotSequenced	NotSequenced	NotSequenced	NotSequenced	NotSequenced_adaptive	0.28565133263319004	0.027510225728966598	0.2753941452341488	0.03948152731669162	0.12086343042361775	0.06172126129933326	0.2528730678625241	0.030319671002620688	0.2958403197493267	0.03183680108699753	0.42624404484135603	0.055360784861974134	0.4317535872303687	0.033830670887426716	0.4670109107055115	0.03334469599044175	0.16572643698356665	0.03217260701341736	0.13164809833883198	0.04502233562549384	0.4232699359804406	0.04645025002592357	0.4136289035103009	0.03472644478857745	0.4031895637975929	0.057675178625994125	0.2813642320897498	0.08066837461240697	0.32767370276683183	0.08069572988278755	0.4792099338782062	0.053458170026344516	0.5832343110171876	0.07198539196270255	-0.1417626317865744	0.11612679512141146	0.2662592070898428	0.034899345240256716	0.2532251100369731	0.062005292158473474	0.5432915929727845	0.040769986127528655	0.5295546866519163
3379	Diploid	Diploid	Diploid	Diploid	DTR1-stop_gained	Diploid	0.2469820325377283	0.02445939448127693	0.22206223480602708	0.03270920910008367	0.08245045648551498	0.052697855402279496	0.21349920566380226	0.02638568480754805	0.2671304805894748	0.028374869508721468	0.4642643550531258	0.052160563353555116	0.3441218489074888	0.03013217428743558	0.4723936302020452	0.031260300953634336	0.13681868042228934	0.02680078001431814	0.10525746066369336	0.036876952717994974	0.4781337487846543	0.04104607271205518	0.3564632199468062	0.031269783081877	0.3977265872119633	0.05501922914499532	0.2680686430068351	0.06427528863422853	0.42858352888886103	0.06945837060710122	0.44689205810659616	0.04968208359067959	0.5934286711184223	0.06962330542865577	0.136754685963364	0.10502860372583504	0.27846033570581474	0.03181159944046253	0.2557221912195685	0.058802951015605585	0.5062427517184366	0.03435367798830374	0.4698115257616072
3406	IRA2	missense_variant	Haploid	PKA	YLR157W-D-frameshift_variant	IRA2	0.9022049586123684	0.0182825932034831	0.9530417720042	0.16803795236346875	0.7863902259639438	0.1285070539090763	1.2774271021764534	0.12075701479856668	1.5491714031673407	0.09667691924651267	1.0980850787288752	0.2243287903485379	0.7937855202127431	0.121268755517894	0.92346684043946	0.1021910100034343	0.8445258111183422	0.01960173669104401	0.6699896406534315	0.026921181529125714	0.8276634880321694	0.031876061812526155	0.9559813748413774	0.025990876319024737	0.19701329314871804	0.05116270278895201	0.9232596846877784	0.026136564173579548	1.207796299353119	0.049112516273984205	1.1133143556693317	0.044228415522095006	1.0535221897710176	0.06649740405066573	-0.3714034172811284	0.1012804736373599	0.5993285180640184	0.02858667072751805	0.6372785785973081	0.05602192037581373	1.0881561278326646	0.07985541954081209	0.9654250487751468
3577	Diploid + IRA2	missense_variant	Diploid	Adaptive Diploid	None	Diploid + IRA2	0.2327351959268291	0.03567981949867862	0.29540910330253645	0.053543926232989786	0.10683362903578657	0.08620589051907271	0.2023160142009683	0.039698967429447264	0.27271349241554105	0.040769119155016034	0.2381177970486461	0.06174273321108836	0.35577813029767746	0.04098481083787309	0.3166269365382197	0.03691328871255448	0.1956091442370004	0.042306183123882235	0.1638248776846296	0.05757706367312094	0.5004774241744948	0.0576113478175599	0.364412175492484	0.0433547870012956	0.4070095564219504	0.06401332732720406	0.35715346829340017	0.11339857275855565	0.5081955132155376	0.11065022079596833	0.4397021760665496	0.0705726821596093	0.6555060673450718	0.0787978219799478	0.14763182799002586	0.12292623860326485	0.2137545296695472	0.04309878911186475	0.24358532090241716	0.07047260831167057	0.5229904641223376	0.0513362165937319	0.5690745611019785
3585	Diploid	Diploid	Diploid	Diploid	None	Diploid	0.20940354267402425	0.026123071928056445	0.32435185077898643	0.03516017674714145	0.07569699848048451	0.057280406011504865	0.2049009746480153	0.028089640552536318	0.27679214620132425	0.0298982647940846	0.4337337319222543	0.0560468321301089	0.4372286412616512	0.03411535196941653	0.4611986244658541	0.03377288593957605	0.17426308990700362	0.028631458502038843	0.1381760723112291	0.04047286068002078	0.4649022409540337	0.04298990130985697	0.3798832387923406	0.033231764403441395	0.4098800825889319	0.05529798007774464	0.12083878808131085	0.07749438090559056	0.4409972440927722	0.0739666694953544	0.471725644698578	0.051686730169020034	0.6316384250228938	0.07044201431771106	0.0009772090836482241	0.10906958147986176	0.25468576533965936	0.03303693943538438	0.2591004530220862	0.05988281508113619	0.4876033356224047	0.03429880041625533	0.5012507419465683
3675	IRA1	missense_variant	Haploid	PKA	PHR1-missense_variant; POP1-missense_variant	IRA1_missense	0.9536915741664562	0.01813811580813478	0.7803669621881875	0.02150383282345879	0.8253291313850286	0.03211363233301109	0.9532503532985832	0.019915464393665514	0.95527824035872	0.023884877826131974	0.8353245398051242	0.051621635465180365	0.8313753450561959	0.029111985210767667	0.8902048679929395	0.030668304055999105	0.8764183411623628	0.01951720518075765	0.6671810218279934	0.026786302512644317	0.9052807888770792	0.031427731321109036	1.119223728518752	0.02582104095460464	0.5536528151045098	0.05100940973190486	0.9984595829415932	0.026009694534842715	1.209245562831105	0.0490916344958592	1.120682464729552	0.04423816618925562	0.8877370804532578	0.06650963319997008	-0.6585399742005719	0.10171859496237437	0.6753003545814443	0.028535238910493862	0.7406912141116795	0.05597715994698523	0.9404576836301196	0.019624633808539363	0.9550384367451218
3730	NotSequenced	NotSequenced	NotSequenced	NotSequenced	NotSequenced	NotSequenced_adaptive	1.12312549344394	0.018067340205035868	0.9847867051612048	0.02138977841389856	1.1201726598672102	0.032062727619201266	1.115974457925302	0.01984520593060373	1.1974482995587103	0.023835674321991383	1.1751282468207271	0.051330699421796425	1.3321824652733507	0.02913796450310968	1.3163445642118865	0.030214932898633355	1.0358758942022896	0.01947911724341876	0.9323509687313758	0.026581299378219927	0.9560721221431786	0.03115400157159547	1.4304688214280123	0.025724924295631668	0.9550077147410848	0.05098782355786391	1.0332600773363667	0.025992569033278925	0.4503288968012302	0.04939358043800897	0.3620302913016683	0.04461834470338056	-0.5238801344520791	0.07496420970996344	-1.4683149924661487	0.12706922772844673	1.0559449848168914	0.028432757654629395	1.0890731780209928	0.055896037782004915	0.8857182389775741	0.020626197455214417	0.7634930595898871
3920	Diploid	Diploid	Diploid	Diploid	None	Diploid	0.1124635663675848	0.0277629210568776	0.3246176547558285	0.03789084307567776	0.094958054886982	0.062148512966885	0.10091513719780856	0.031095199401944967	0.2841254108198372	0.031543474595682686	0.3353732891150709	0.0604074738732148	0.6174598447773316	0.03870646224975099	0.415171284796818	0.0349930402943235	0.062310936666289986	0.03230847761960783	0.1722565292524416	0.04148232972497992	0.3332053672112993	0.04549909638586943	0.2933949366373937	0.034680261386174	0.3964632515673096	0.056237951518469886	0.2957183249315681	0.08740229673427459	0.4757024518310591	0.08674275853391543	0.4307076732571928	0.05488693149247127	0.6872520786809677	0.07197456451748738	-0.10210738177436718	0.11241859611793828	0.31066530950761895	0.03697116343373386	0.22002343224954127	0.0623525687853075	0.4737983689647354	0.04819816236476798	0.427469494393286
4418	Diploid	Diploid	Diploid	Diploid	YIL161W-upstream_indel_variant; MAL31-missense_variant	Diploid	0.2513648540183231	0.02890413861215492	0.3656529470973997	0.04165059476309245	0.12661075485066936	0.06992812328129479	0.2277724881491885	0.03245963950596573	0.29040476589100084	0.03348190026138244	0.4529841025986322	0.05596251592718128	0.4209053536754823	0.034168521177707696	0.4281797033134308	0.0336500853479868	0.16556598746072584	0.034470259972846605	0.0657961438630472	0.04864127798473577	0.4235563430056136	0.0501759007653152	0.3786380997910385	0.037372500918847265	0.2919764381910748	0.059961568907227314	0.3335668132719289	0.08959476511853523	0.4455506766612857	0.08619098111123252	0.4988870328264964	0.0545413165044271	0.7494803851660552	0.07125609543428862	0.22512948935626728	0.1122139184278626	0.2903877694908072	0.03679353681655676	0.33155806652549297	0.06315752782081847	0.526419142516016	0.04160854171212788	0.5195550433449942
4691	Diploid	Diploid	Diploid	Diploid	YPL205C-frameshift_variant; TPO2-missense_variant; GAD1-upstream_point_variant	Diploid	0.2343891484345432	0.029030321285201444	0.3982238984153604	0.04127373720549719	0.12887416885867656	0.07084836877417483	0.1914693774657813	0.03313139942384508	0.3243299336910224	0.033774484289666666	0.4558891812316664	0.056412740421950575	0.3853037036476555	0.03469062484915798	0.3834529387728457	0.03430822935857957	0.1818560589507721	0.03593475931705655	0.06987978096912031	0.04887153694635799	0.5055057272391198	0.05113465652811474	0.3143823195903653	0.03646045034674816	0.3855936373854151	0.05820103563395235	0.34159883619457176	0.10380040039472288	0.5543290620880204	0.08544937220379024	0.4948916153287085	0.05357966235577587	0.7247500421693941	0.07234175832277878	0.14490467011264474	0.1091313343677068	0.26004227073928865	0.03668129465145641	0.3194931361633904	0.06261334043643693	0.5493749904883133	0.041878679256187074	0.5138928004624015
4791	Diploid	Diploid	Diploid	Diploid	tL(CAA)G3-upstream_point_variant	Diploid_adaptive	0.43659982968218736	0.02235362403313737	0.4814839809540559	0.02847766284287258	0.3921280038773408	0.03776782082139677	0.4873853606225131	0.02415940987710397	0.4836545504474784	0.026729719073515314	0.6589404614739255	0.0524880869323913	0.8508829456620185	0.029952248707637588	0.7297522040841192	0.0310303052471519	0.3862602624049605	0.024041207123665226	0.2722632061488357	0.034159459429585794	0.9313580095913624	0.03518834102440176	0.6568604991562503	0.02873113122704288	0.2588875456817488	0.05330882753920707	0.7514479571619409	0.031806672477342514	1.071962973263341	0.050334831307020975	1.2705066733633157	0.04435275888740363	1.6360104004981977	0.06651676873113054	0.32841635694904114	0.10217533860726777	0.4261896725201737	0.031016522611582567	0.4549296003579506	0.0575764531615614	0.8996855285474159	0.025946885774453587	0.9011902830815636
4949	IRA1	missense_variant	Haploid	PKA	None	IRA1_missense	1.0140494740073618	0.01822250780827327	0.8025134530211129	0.02157276774533742	0.9426794852884668	0.03215070515086238	0.9044572060521312	0.020048920722702597	1.0405700172935168	0.02392176938099389	0.9503428872726732	0.05181799306550226	0.8813927048438921	0.029203624323397282	0.8952002990888791	0.030851945837885326	0.9419498042695842	0.01959111948812649	0.7217409868778516	0.026957707600425027	0.8945775156252541	0.03176225000268036	1.1215942950126203	0.025902261678710875	0.6753358565261068	0.051024564131645384	1.0534470756486305	0.02605092601681731	1.1733188921955908	0.04913285319609136	1.201831143927569	0.04424875039846492	0.8505942987202777	0.06652955580259687	-0.7867318363694792	0.10289997999859726	0.6884148441505188	0.028616454138740362	0.7813505203072385	0.056048307039571	0.9864872408828096	0.01998564378416324	0.971632204896458
5564	Diploid + IRA2	stop_gained	Diploid	Adaptive Diploid	None	Diploid + IRA2	0.7023658698444275	0.020424805430405226	0.8873682853889543	0.02378860687130674	0.699039415110325	0.034063311314830064	0.7949397794188433	0.021994299561411305	0.8478482295248837	0.025079606343106384	0.8494682023292777	0.0515336052193367	1.0115160326498045	0.029324350785578563	0.9216141836937836	0.0302960120401258	0.6942051297968284	0.021713320034159943	0.5939294797431033	0.031137069435418826	1.0543469751243104	0.03461332751498886	0.9923876276569134	0.02729482181419491	0.5330743509324243	0.05156577291719624	1.0675607270808147	0.02774682263881149	1.377386662004979	0.049477541393700766	1.4544356452713132	0.04426691785581408	1.78035021576946	0.06650114767133901	0.1399568331538845	0.10163552196382633	0.6080683250561256	0.03059651025615926	0.6107467308937615	0.05755830408831113	1.003091495256586	0.025472909229495053	0.9011961989540404
5654	NotSequenced	NotSequenced	NotSequenced	NotSequenced	NotSequenced	NotSequenced_adaptive	0.15313730441436685	0.031070197732895075	0.3798815094448554	0.041475282500638484	0.09996127158558328	0.06865697808765514	0.21541275858899508	0.032106326035441696	0.29960524457112403	0.03282308426626484	0.33298494985917665	0.05645957484682061	0.6001632574417674	0.03538090081691172	0.4570763786873181	0.033081641705610884	0.1272922263900476	0.033944757700175486	0.1514183425826084	0.04575493320466724	0.5199799074444736	0.05170831911290605	0.30483405466422914	0.03693961495799774	0.38519383261449003	0.05894540821070469	0.179144448845529	0.10547622963727332	0.4414434685909754	0.08801755602923299	0.4728771828117523	0.05781360782529886	0.5883596460009188	0.07325055336373452	0.08906006902353016	0.11144456367447422	0.2755830257670719	0.03766598590054933	0.17399867964110372	0.06381681011107025	0.5242130551678001	0.04344546119194555	0.4623247681727998
5804	PDE2	frameshift_variant	Haploid	PKA	MIA40-upstream_point_variant	PDE2	0.597872892785125	0.019437733375677592	0.8095644887715091	0.022386304285838085	0.6854270058483579	0.03291677719101401	0.6754746329773142	0.02116239144643274	0.7300314231049473	0.02451474928683309	0.4878853942897284	0.054448724262699366	0.8859742496087686	0.033466634283124776	0.6578956489440835	0.031267332803932686	0.7159946163972731	0.020488167231386842	0.5391416033507855	0.028697705081883237	0.7079391869260113	0.034599490643835225	0.8197571182552758	0.026766412262394543	0.6249378830319624	0.05119878771247088	0.9002817147985529	0.02731283937094484	1.097268864072408	0.04941327084037399	1.0354803929755425	0.04439064893197758	1.107949835512018	0.06667211638465928	-0.4031479937298563	0.10229949266926998	0.643526826487883	0.030654589678933187	0.475418286189574	0.05779273400294475	0.73723599942139	0.030270029102700532	0.5792254571019272
6174	IRA1	frameshift_variant	Haploid	PKA	YMR010W-stop_gained; YGR125W-missense_variant	IRA1_nonsense	1.0629036224987156	0.01839306095752424	1.0625627836957592	0.021466674596716195	0.981491827058714	0.03218752852540049	1.005496234527522	0.020143173148031674	0.9862940620728452	0.02408566936457822	0.8408021986258603	0.05224900733204072	0.6560883476654782	0.030142008215808893	0.7598682186278105	0.030926163766779417	1.0614623414155575	0.019637291870244454	0.8470677834919952	0.027137460852447625	0.3249477416210899	0.03777102530672438	1.1548753429847602	0.026113494018793253	0.8381260094497444	0.05107050439448441	0.8206265395298722	0.026576774659598804	0.29548349622180603	0.05083667807353896	-0.5320857441202953	0.07746021807084331	-0.9865987413747128	0.12148055463184275	-0.7998912942627966	0.2597204487701993	0.799082617075984	0.028658259090633676	0.8927319040293892	0.05611526089043053	0.4358036338161176	0.03578052527497058	0.3263224068604267
6271	PDE2	stop_gained	Haploid	PKA	None	PDE2	0.686169100108709	0.019446889844615532	0.8649127272317387	0.022486456167224275	0.6986676369204458	0.03302037356374108	0.7227868549243823	0.021181872135538474	0.7262665475940416	0.024656570350667827	0.6288655836953447	0.05230232766084709	0.6515526933615198	0.03035113058248135	0.6557181255086707	0.03096229239655329	0.7368389769151732	0.0207010748273084	0.5586265879258409	0.029277128697672256	0.6121137681074325	0.036481081381841626	0.8266122391473041	0.02693720289840889	0.6000925949250776	0.05122738869069721	0.8907929643982552	0.027546269920813604	1.1098988015462077	0.04946439941516286	1.0099255336587074	0.04439363609050538	1.050202531751124	0.06667062506633432	-0.3444830535640497	0.10262897371839096	0.5986321322061323	0.03001459650359451	0.5932791966840786	0.05727232537989744	0.6822178531288173	0.02793692834001329	0.6633159559071014
6391	Diploid + Chr11Amp	Diploid + Chr11Amp	Diploid	Adaptive Diploid	SYH1-synonymous_variant; YDL144C-synonymous_variant	Diploid + Chr11Amp	0.5570900169470088	0.02224022706734604	0.6073887285164628	0.024979218510403325	0.4809244553754831	0.037440455366565824	0.6413893683530553	0.023246993355586533	0.6620457314319051	0.026639567262368352	0.6258492055808272	0.054012580182548814	0.7212540952940965	0.0328833651784301	0.6354558838307459	0.03180477548242644	0.6139713846123863	0.0223875277508965	0.5050696566859738	0.03169110862550721	0.9916205536312116	0.03697927867612568	0.7616141017491069	0.028559655043435692	0.21082752120114576	0.053546644373555705	0.7467320999788787	0.03222612156527445	1.2103538217867222	0.05012892206180762	1.3453283413150137	0.04432981411227868	1.790587666211943	0.06652560515175013	0.508845515044249	0.1009389793501624	0.24799949822512066	0.035760488277696775	0.2474120570283561	0.06185750465724365	0.6621713401527904	0.04691238278104122	0.5657187779391993
6582	IRA2	missense_variant	Haploid	PKA	None	IRA2	0.6749455274622735	0.01905304979118247	0.7269172512857287	0.022889322614445717	0.6614730362376745	0.03305349691755965	0.6040212431736508	0.02124108495309	0.7632225407881094	0.024378852068926853	0.6139087394657103	0.053332445187861365	0.6427503448559528	0.031346013837511066	0.6360047300815487	0.031469704149816015	0.6429167604915669	0.0206112032508813	0.4564655869169456	0.028635140115443318	0.6888985790197649	0.03437550842489635	0.8185546592120713	0.026598863055269505	0.6310631031511651	0.05120917538729335	0.8409115819243037	0.027525288234405487	1.1586098092117352	0.04951542161218042	0.9924013716912587	0.04447797452550351	1.136180034426502	0.06663206236561857	-0.17086210646230762	0.10223093276308272	0.4415432647888893	0.031649614932093964	0.5020179659768057	0.0581314115246044	0.6510795220051276	0.02640974355194096	0.6355222718764226
6814	Diploid	Diploid	Diploid	Diploid	None	Diploid	0.20813951735170907	0.05328374203068529	0.4217325080621068	0.0827485646744977	0.07716836403385638	0.15964734310844314	0.20411349609853666	0.059391914620642874	0.19632644274645264	0.06406203878153051	0.41723935742190293	0.056942519522390024	0.39443331502792267	0.03540897044864924	0.32850706355882475	0.03464799887446938	0.08003546854372515	0.0685104147620733	0.1733956528858326	0.08545102452166506	0.23576748218882956	0.09886540153914518	0.19289751843189226	0.06798856110292519	0.3530401721223225	0.08250171913947654	0.3204601052374851	0.20894893872734105	0.6633949094397219	0.20665687669020694	0.11842891236010662	0.11049079094560224	0.4843510508616386	0.0939768374651255	0.2233289950861888	0.15065561118007229	0.2945739527328024	0.05608811543483743	0.3841060969349592	0.08832291122386511	0.4414615350127109	0.07799411896071648	0.3777287351415868
7269	NotSequenced	NotSequenced	NotSequenced	NotSequenced	NotSequenced	NotSequenced_adaptive	0.591691383546246	0.02006295497910745	0.7770235196605949	0.023886209214249256	0.624884725582426	0.034180548051555265	0.6982919731065359	0.02199589167228189	0.7152578319481592	0.02511069030563401	0.5635642416392523	0.05222532338570525	0.6644577864062512	0.03021058441495585	0.5925056692558514	0.030787584856074957	0.7449458301434683	0.02142188283839376	0.5382281904911309	0.030400929834386668	0.7379500716070756	0.035562725907832896	0.7960294809148089	0.02754197226479221	0.5206221424389759	0.05154245258915593	0.7516834493785146	0.029864347934269536	0.9840189169882388	0.050094798381085166	1.0020661884486717	0.04457584942607781	1.225186583842969	0.0666816846599041	0.10627513152950334	0.1020625215260949	0.5049516798737703	0.03225341156585892	0.4637069167237653	0.05925323030897429	0.7377401463985698	0.02744581052808588	0.6782262663817147
7291	other	other	other	other	IMP4-missense_variant; YER156C,COG3-upstream_indel_variant	other	-0.060682959550209574	0.040316251768283705	-0.06625071855594263	0.05865202356182341	-0.06813782789949409	0.10876217328517024	-0.04440931689208144	0.04511732504677203	-0.04630475646584135	0.0508336411045144	0.033536747466591375	0.059069758170696124	-0.05136583362227316	0.03720868447229516	-0.015532873917562803	0.03724815647018507	-0.008587578050556587	0.049216562345051104	-0.04249167843089793	0.06037120476674258	-0.07200708631615603	0.07981729521746732	-0.08050734588181338	0.06297953233452502	0.1085042651772202	0.07598683252128252	0.23804850720309545	0.16193308480689925	0.11656615670880092	0.17965298618921352	-0.098353196722896	0.09137409085272774	-0.0738932419450789	0.13324085537796632	0.09379366928931496	0.13502219242645744	0.0188891697673176	0.04931272985517362	-0.013447383850894041	0.07829871644615218	0.026795492690511936	0.10713742089463464	-0.11666352395136854
7375	Diploid	Diploid	Diploid	Diploid	HEL1-missense_variant; MSS116-synonymous_variant	Diploid	0.21898523606996928	0.027262746808738955	0.3024257025264	0.03690174777232105	0.17899975859322587	0.05952994375307511	0.21363745924974772	0.02950844527707665	0.2644455170654581	0.03130049490084566	0.4065477318104792	0.05541650660093287	0.4348326557864751	0.0337710463115	0.4140519425813552	0.0331150402006146	0.1148558833609538	0.031125593502997945	0.1905574985807756	0.0404177188508881	0.3613423718733316	0.0464714039150534	0.3477461726093334	0.03481998455351155	0.3618140894588693	0.05723048595905375	0.26830824814902937	0.0774132211731862	0.3841798591687026	0.07969220323493523	0.5346014612495689	0.05083749543774125	0.6800084006890563	0.07096438628063054	0.10318542686344903	0.10696123046985123	0.2925304804744802	0.03439398389671204	0.2968363663531229	0.060949518691565535	0.5019005427309685	0.03941464307981171	0.4302084405522239
7423	Diploid	Diploid	Diploid	Diploid	None	Diploid	0.2409525991265387	0.02741532551482837	0.25704270092484144	0.03883925428157838	0.09241814435365396	0.06079655557457508	0.26768438731231753	0.02922659107012658	0.31488205399368896	0.03043956150231948	0.3959565137709434	0.05605678087152488	0.5322488041714191	0.034447434451087645	0.487775461296091	0.03326782341750932	0.16596646346900978	0.030531838932637355	0.13755884896876716	0.042746495514399935	0.4322639802244991	0.04564914749911063	0.3859240925117373	0.03385686130414936	0.399754269479637	0.05659815602300777	0.2804598489292359	0.07945629250844936	0.3641858188830483	0.07932475729842964	0.5034227953911821	0.05186605895677944	0.694646325014046	0.0703073442007096	0.1685525816429255	0.1067372004273538	0.2839380493652075	0.03460615719409682	0.19487919110904325	0.061475350449436486	0.4718118619551501	0.0400841086269832	0.5572191265590514
7538	other	other	other	other	SEC31-synonymous_variant; ERG1-missense_variant; THI3-stop_gained	other_adaptive	0.4584808499518314	0.02182297900536223	0.7212820590970536	0.024734269073105258	0.6371992960010173	0.03459381152494364	0.5935825929524534	0.02398039190509546	0.6453765017268418	0.02603488989436696	-0.01845241201242869	0.07365618509707245	0.3464254713044516	0.0520858225930347	0.040387838178105664	0.041781883974341766	0.6326824743099012	0.02251072031429908	0.5164191944961307	0.032060249242784035	0.4816128997475442	0.0413861088560076	0.7252148647443899	0.028720126326166405	0.6313441173361848	0.05156568522623165	0.8930689048184701	0.029907181315356912	1.0774315926713458	0.05016009938254841	1.0364899253687498	0.04489935752004995	1.0615383972320696	0.06713591075305729	-0.4239195513822409	0.10582005486228094	0.4778438859400472	0.034039833134078434	0.3185088307809765	0.06119563806928442	0.6314835795603567	0.056600546253983586	0.5522962473132612
7539	Diploid	Diploid	Diploid	Diploid	BEM2-missense_variant; YNR071C-missense_variant	Diploid	0.16114167672863647	0.037167916605628015	0.3327479508193044	0.05292936665107335	0.11604756476093625	0.09224216725270264	0.2271829488452527	0.03966386848667671	0.1724177289121442	0.04479346890971519	0.3964120278369156	0.05595285426423241	0.40665212108618265	0.03410303913310199	0.3827658958535711	0.03372645711497856	0.1588908853011632	0.043748627544705904	0.10454382109278214	0.057864583240007934	0.30124513310647605	0.06395318403077092	0.3030211436036417	0.04545122824279196	0.34100707697409016	0.06619423519259382	0.17213390670029174	0.1268684612602729	0.6261995202937429	0.11717845347488386	0.4705889402333249	0.07162498767568626	0.599934692876528	0.07973834527269016	0.08061681453076826	0.1324908096487485	0.23779195380107704	0.0431835791218265	0.23296400180383545	0.06955633165232379	0.5223282411569569	0.057380717120619214	0.496791656806668
7774	GPB2	stop_gained	Haploid	PKA	None	GPB2	0.9202020692379836	0.01830625247071764	0.7482270583291377	0.02175917051774699	0.7894876956632625	0.032234340336286985	0.9124516629101068	0.020118604278461242	0.8053522690077479	0.024061606439336858	0.8555463100525976	0.050986945422777666	0.6494064403656273	0.028411016703701518	0.7926896805090378	0.030211056523842313	0.8762276301376427	0.019643212472174636	0.7073109938944275	0.026977610753240767	0.7838187333885346	0.03212932779451691	0.9891105474951428	0.026047098078513437	0.20553028263177486	0.05119100407537437	1.005056597980153	0.026149297541053888	1.2590673302591358	0.04912473694772517	1.0982766283011756	0.04422948512526367	0.9788752875050089	0.0665041861019279	-0.6135735213565249	0.1017404076460171	0.6075830365038914	0.028617770268377408	0.7430211114745798	0.05604761764321317	1.0186198558060957	0.020819757308424183	0.9608408608812536
7799	GPB2	missense_variant	Haploid	PKA	TDH3-missense_variant; YLR257W-upstream_point_variant; HHT2-synonymous_variant	GPB2	0.8019517403876886	0.018630975150370654	0.8073088368691053	0.022064394222204783	0.8282136109487459	0.03238342015123364	0.8577548650423349	0.020489965580539216	0.8366600237438147	0.02429783210802476	0.6447791554331517	0.051334277765459686	0.9319848666183486	0.028907967932401718	0.7888782197480642	0.030198404768301563	0.9097654709587744	0.019874495624780757	0.7375644034123839	0.02741622160128716	0.7419160754909463	0.03336582599290813	0.9792206329830601	0.02634602509795221	0.25067756623193005	0.051376469695210834	1.04953770608662	0.02632983412380999	1.2609985784655529	0.04919250392963058	1.1305654340396414	0.04425000072463498	1.0562132046958157	0.0665267110680434	-0.6129930860502716	0.10287808793377558	0.6363704587734856	0.029141540580741625	0.6703456508781445	0.056362796550445265	0.9888865666093996	0.024373088591069292	0.8620119634492993
7836	IRA1	stop_gained	Haploid	PKA	ABP1-missense_variant	IRA1_nonsense	1.1591937829523271	0.018162618513080545	1.1841080799182933	0.02140755907104716	1.1745417540618606	0.032085380693325324	1.1864294103622155	0.01993831872326981	1.0234199868095872	0.02398676359847275	0.9716509720067962	0.05112916757884412	0.9154095574456568	0.028545988433931836	0.9833787236268438	0.03020930967230064	1.3084585053376092	0.01950218543296181	1.0071318946123593	0.026804536622989702	0.511498025095115	0.0334748991269915	1.3041475477613125	0.025928062884955395	0.8755070515340415	0.05102609847391767	0.9678300726040228	0.026132317691983167	0.24417091643146	0.05088392121635306	-0.6615855329958256	0.05994439585504999	-0.5202148473871648	0.09257780581457042	-0.9820924568187672	0.18437007787751974	0.8968903663163842	0.028502704566516268	0.9796932227390838	0.055968755273101634	1.0317371591779396	0.02264478585397994	0.9086684987430886
7953	other	other	other	other	nan-nan	other_adaptive	0.9239451303396162	0.01826767078519564	0.7159500454672834	0.02166110513038515	0.7607585014319999	0.032185365872814675	0.9432491179226842	0.02003553933954411	0.8492995673147061	0.02399739410404696	0.8320401800851905	0.05123139463082349	0.7089734569826829	0.02854560357524775	0.8677578024612385	0.030343445240841545	0.9048219798346762	0.01958452131589393	0.7056993626088989	0.026921681656767296	0.7907972780199034	0.03216094056675033	1.019904908954978	0.025998919173317453	0.22361957391223272	0.05114614994961992	0.971463290180106	0.026104011509008217	1.1938816049826673	0.04910906902392398	1.1154823016553668	0.044226348394738345	0.9316061544636294	0.06650090316301124	-0.6356936102456623	0.10176937948570497	0.6159549822062627	0.02855588173494552	0.7093132173788607	0.05600365396239625	0.9570227659971692	0.02002769834018716	0.9573910770949068
7961	IRA1	missense_variant	Haploid	PKA	GRR1-synonymous_variant	IRA1_missense	1.1082485499121946	0.018186554668064816	1.0216685776006391	0.02141565408019808	1.0184657305347091	0.03209617923727478	1.1393486219990163	0.01992874081618861	1.008657683240428	0.023936229798949844	0.9889335918845218	0.0511089049344839	0.8050154155633621	0.028518239804712218	0.9814623390229904	0.030270248521493875	1.144858407587895	0.01949538472006852	0.8848181460475828	0.02682052881776402	0.5484120785837902	0.033380510088074064	1.2715237963938724	0.02591402319553777	0.8410135145508252	0.05101793730578901	0.8780770332269909	0.026145468633951976	0.19062693287487786	0.05030655018299848	0.03481635595275373	0.046331752370499184	-1.2677963936560048	0.0850165842421234	-1.227063802508966	0.1312837502334338	0.8747345155231296	0.028481379105423213	0.9193011855671352	0.05595575434956397	0.8791269424046012	0.023778236595079303	0.8823385369400218
7994	PDE2	missense_variant	Haploid	PKA	MYO5-missense_variant	PDE2	0.7082149581398779	0.02028299121624615	0.7991157953583878	0.023432460910218413	0.6232873534937419	0.033754409526166186	0.7084897503689241	0.022289609677218204	0.6713261763851397	0.02519631285905332	0.679226448203735	0.05235685436345552	0.5186041166919809	0.029986640331137605	0.6306113924007056	0.031118502173703762	0.6732574412498896	0.021874262890841028	0.514872910038678	0.03126477478336239	0.6935242776181751	0.0375738242948497	0.8615879489878523	0.02767862390039769	0.6451793451371133	0.0513820814544174	0.7954011340973065	0.029120011063328156	1.2627460868326523	0.049716085495365936	1.010754077340522	0.04464326985551212	1.2005704818972949	0.06672323784420701	-0.085627521456788	0.1034041156545675	0.5583382707274062	0.030914532468780107	0.5916947833174437	0.05835892957931806	0.7358711637729687	0.028238704601304718	0.703136281772719
8297	CYR1	missense_variant	Haploid	PKA	None	CYR1	0.7163019765313053	0.019334304289325602	0.7442967417717771	0.02280650371705405	0.6721858469428116	0.032829631274874316	0.7362424277542994	0.021239911851313964	0.7454554929731017	0.024656923221731568	0.6109485439159021	0.05289287816050111	0.7596036850762118	0.030632264462806175	0.6939751132964134	0.0310457424217496	0.7789957530164325	0.0204854754956016	0.5919061810095536	0.028438808642636718	0.5179132182809915	0.03661711179627339	0.8702003881517633	0.027018490506799192	0.3917006713460486	0.051537860646055235	0.8802865945770258	0.027308512932945284	0.9388115072810068	0.04957660603916167	0.8322042321816309	0.04442134783765581	0.6449744263204452	0.06684869643429851	-1.0406494593950573	0.10708745934496	0.5309546220111523	0.030150543017169462	0.5339748971456658	0.05721424984246009	0.7699277011637924	0.03059354737745549	0.7183838839819089
8459	Diploid	Diploid	Diploid	Diploid	SHC1-missense_variant; MRPL4-synonymous_variant	Diploid	0.2966420944798622	0.028547585249349836	0.25274551276725443	0.043707769433741335	0.14448852690228434	0.0614887065938914	0.2905798467524923	0.030822849211448795	0.35687627148829904	0.03234041657062789	0.5432119906043689	0.05532855643737815	0.3752503051336841	0.033394208148605206	0.5137199627308904	0.033843633812313485	0.1791053090430173	0.03181069437374452	0.2102509127775529	0.044762444787114886	0.6231797760876034	0.045885620574378616	0.4294528906492612	0.035074808607701576	0.4194639967478184	0.05734192933987463	0.2845303975949157	0.07764943202932117	0.4100707014115539	0.07350500794081441	0.5347226876716346	0.05209957637161212	0.7255468544564103	0.07031906764097229	0.13889372361741575	0.10791560669647317	0.2703588644733825	0.034566580730534265	0.315734869370916	0.061307092209080837	0.6662629899572108	0.03611741087602662	0.5964852877553377
8825	other	other	other	other	ATG32-upstream_indel_variant	other	-0.07887925500193567	0.03305421067106158	0.01079356518818089	0.04819097546730699	0.11748261395754132	0.08161463466221168	-0.08988011215311509	0.03863293028002236	-0.08168280542627537	0.04346066023424988	-0.06798514476941538	0.0663478545202703	0.07929606672782193	0.044646919967971516	-0.028306287115635306	0.039917728633480434	-0.02710686129738557	0.04082707328289478	-0.0160688743300447	0.050894961569844265	0.007835796842863552	0.0632397305233934	-0.04924621472309386	0.048101969540767564	0.03647500081425262	0.07004574381676502	0.08253570108723317	0.12834213813693493	0.07136432370201116	0.1280569487410018	-0.03187988694421725	0.07774729075750318	-0.061511261839844275	0.10873974887880118	0.011477715955345056	0.12015000450099833	0.02042052940567944	0.04533770534190597	-0.03884057750073562	0.07321775958973806	0.13349553020216778	0.09773004169586516	-0.014222717959187175
9293	Diploid	Diploid	Diploid	Diploid	ACC1-synonymous_variant	Diploid	0.2399988680541003	0.03215359111028899	0.3541694380797987	0.044745062292217266	0.1297591534369595	0.07668751973935907	0.19122273300371295	0.034187257116449064	0.26993193935529464	0.03565665570631358	0.4109112935721537	0.0552184444851711	0.5104978628657565	0.03381301876860108	0.4390738942683985	0.032781800636672354	0.10263981134251464	0.037754086881104834	0.09595140557245076	0.05191704349654934	0.6091390615033805	0.051140692306990455	0.3719893009737701	0.03923754285330993	0.4245635807434114	0.06093370381361025	0.2894035931127041	0.10696218446056972	0.35850397862866057	0.10566482132979736	0.440100409905859	0.05998185237314325	0.7116412894516668	0.07327081369156893	0.05540635450265894	0.11507036809372301	0.3156391220983992	0.03868477556489685	0.2390551352860825	0.06588064751093464	0.4638909906023713	0.05422470992056114	0.5077548465428947
9518	NotSequenced	NotSequenced	NotSequenced	NotSequenced	NotSequenced	NotSequenced_adaptive	0.19663930112513373	0.03171753989082933	0.3386508795963245	0.044001464292579805	0.16822576571645162	0.07281872925384064	0.18097286931588769	0.03577586075058877	0.2875401194506794	0.03641728632196525	0.3415517307874591	0.05787790309574194	0.5742181868831379	0.03650263335364281	0.43836846279267655	0.03392964000164374	0.2320663243275654	0.036076637732811764	0.11924819304843147	0.05006721363791693	0.17551941571176732	0.057658831137744164	0.3812198123584487	0.04005382344943486	0.4683953420680912	0.059412785512042675	0.3012588258586937	0.09496894228246867	0.4739118257063253	0.09130759611532956	0.4412065382401643	0.0578443717650984	0.7466524351807884	0.07320257380007136	0.11094900715960293	0.11139412710629784	0.3391224424454148	0.03969850746413578	0.2478653939112087	0.06544947092249946	0.5042036313155047	0.05867280964677584	0.556110904369805
9589	Diploid	Diploid	Diploid	Diploid	HDA1-missense_variant	Diploid	0.315722052022167	0.033064701017334164	0.4250650026972385	0.045398465716344635	0.2831977262281597	0.07045040121274504	0.3322366593432411	0.0341004457798169	0.4407099764388492	0.031890181861529115	0.592539015762946	0.0518975736617328	0.6536675222106709	0.030082068398152667	0.5806568038874428	0.03089123343242658	0.2738207925216459	0.03730736718835196	0.2693229414719552	0.046317130582821296	0.5256664944572158	0.04838956112137421	0.5551342530698266	0.035315295815461764	0.3292932147392896	0.06512945973255363	0.5504195374036698	0.07467406305000854	0.8249898356269918	0.0707562748683511	0.8140258422591323	0.04725543435372444	1.1420430115838591	0.06759750712711812	0.11974899383425315	0.10685398439135976	0.3956067161955672	0.04106518624080487	0.5128864693304209	0.06708041385364467	0.7229045759533326	0.04179998481479171	0.7083055793690046
9689	Diploid	Diploid	Diploid	Diploid	PSE1-missense_variant	Diploid_adaptive	0.4667795532941453	0.020458795509997785	0.5530928743910647	0.027825168973944117	0.3319021705150147	0.03795381482267885	0.4494031200896215	0.022675542164374885	0.5667721094946799	0.02524370790941657	0.6732846866551363	0.05337370916158568	0.6808104515016994	0.031530026664565815	0.6662132900388003	0.031534579644704366	0.38004477667895903	0.022742301992898572	0.2859632005579941	0.032316074275940354	0.7995567291381888	0.03399231242711566	0.7460364678206872	0.027363829792947585	0.6608916395224028	0.05182924543765313	0.4964676092782843	0.03924698927438639	0.6637185685670035	0.05408239159250069	0.8410770976555761	0.04562839066205515	1.1808593546767698	0.0671203765190173	0.6387930210343126	0.10202897781309828	0.40972227174078907	0.03065064380124776	0.4292972141662371	0.057784613730221236	0.7680645560071508	0.02374303330931466	0.7367037743964637
9864	IRA1	stop_gained	Haploid	PKA	HEL1-missense_variant	IRA1_nonsense	1.1181051376003142	0.018600457775184227	1.0983828661486532	0.021820238133999508	1.0843876504835903	0.0322991443856726	1.154901901087512	0.020485177814201685	1.0993631508540698	0.024243620893669937	1.0403089326255432	0.051084042207963615	0.9860028390440796	0.028519552039844825	1.0219256122291858	0.030157963341887983	1.1644466876112345	0.01992761279267036	0.9071758641656076	0.027719575585890284	0.7594563360979073	0.034795932629041015	1.2473535475079909	0.0263313927070281	0.8276777327715149	0.051213026874908064	0.9571087287639358	0.026652188294336517	0.7854524828864836	0.05037222840889069	0.3270096455262937	0.046073113825036566	-0.6162662398706893	0.08601651317180202	-1.246271196161294	0.1825144586940008	0.9335330514751988	0.028984710256244387	1.0496701798188484	0.056384653992381864	1.0380974390020623	0.025068069432420476	0.9344198695631868
9888	GPB2	frameshift_variant	Haploid	PKA	None	GPB2	0.8517100000046917	0.018330170991348264	0.7888145895986081	0.02173350983951755	0.8128597791065382	0.03224047729701349	0.8489176617863649	0.020145472014752516	0.8330218685634411	0.024058214364442384	0.7747268037989852	0.05074914465573211	0.8262427125627383	0.028353646922171957	0.7842638830829829	0.030032189964353594	0.8449281896256644	0.01967777610257776	0.6712857883370084	0.027000971921362315	0.8685394192157121	0.031990192248186264	0.948206812602134	0.026009953911811236	0.28579173094524224	0.051167479435289855	1.0064607783610824	0.026144326202362792	1.277399927922705	0.04913692452418943	1.1335478442132645	0.044225274603298635	1.0354737125862514	0.06650328384141728	-0.5938585963643919	0.10157068575945596	0.6151429935813678	0.02873992996679137	0.7533064887142719	0.056072804724880534	0.9653648805872072	0.02083387434392341	0.9479786740530654
10050	Diploid	Diploid	Diploid	Diploid	MET10-upstream_point_variant	Diploid	0.24129263053706665	0.04106794414245279	0.3374493253679489	0.059421346831367676	0.34178328394592483	0.10675441643887514	0.26672281572856893	0.046031438716416614	0.30717888697325896	0.04464901284545415	0.4129969919269048	0.0589567810552929	0.4714089229118151	0.037422842314383434	0.4454584205407986	0.0351722932388445	0.16184957348336906	0.05070802396420543	0.1552281062248752	0.06600536107672811	0.4564205822801002	0.06800271309069364	0.3618618780735469	0.049552741792495386	0.3544494320857349	0.0721399805470898	0.42371127427699495	0.13826446884897992	0.2801898524436018	0.1300400290079362	0.490076241730993	0.06953990012856827	0.6053902246780534	0.08160355749652541	0.06166509841610296	0.13027432719193302	0.292883296980528	0.04485725092413394	0.3527404160279326	0.0738154574071177	0.5345842349220481	0.0620109005641087	0.5649265613873183
10103	Diploid + IRA1	missense_variant	Diploid	Adaptive Diploid	PKH1-missense_variant	Diploid + IRA1	0.6839335869413845	0.019749577136917048	0.7979956797310421	0.022903924915558958	0.7082451029512972	0.03342382321801072	0.7637829008223163	0.02148949683246698	0.7940254179703321	0.024807243312517373	0.8174792335548918	0.05201468067660288	1.075532286902256	0.02971681560218665	0.9532043446306888	0.030486453416700057	0.6514729663159224	0.021073313133640525	0.5132045633635324	0.029963410964615005	1.0210870803398335	0.033416650316917186	0.9534000209909116	0.02682655940512408	0.4737737779959371	0.05145709497159584	0.9648014742275666	0.02742574631495685	1.4051632068018651	0.049357181622900925	1.3498367524691879	0.044305864089966465	1.68330647562006	0.06650124644119505	0.09157631837027197	0.1016571865478545	0.6099754792449296	0.029534707613691487	0.676644455370278	0.056704697126234674	0.9087908816493088	0.02408646273343575	0.8927068544382915
10307	other	other	other	other	nan-nan	other	0.00946093569420562	0.033202934804168124	-0.0396326386718795	0.04814140964713996	-0.019881276278988214	0.07716395146616975	0.11146123838186107	0.03733694699225163	0.060133124161900135	0.039668651210446965	0.05100791684863642	0.06251963727541171	-0.0760125026302507	0.04041040838761828	0.054589191090024115	0.03975815426772634	0.07420274898879804	0.039086815651671575	0.06670370373117275	0.0508710422062072	-0.012044113234090943	0.0637885982507833	0.08131236484562479	0.04790088813362616	0.0071928751900260015	0.06895963180267649	0.09915776766441063	0.11425240833455785	-0.15465254744298618	0.13250497760651336	-0.12267508556318656	0.08120793714806672	-0.060129725255407274	0.10154476958255576	-0.21051682010943165	0.12351559138496485	-0.00412848983703488	0.041027084213825685	0.06690214492862369	0.07034012267673276	0.15414006188877824	0.0728343856914485	0.08457902718755657
10316	Diploid	Diploid	Diploid	Diploid	None	Diploid	0.256646335810945	0.029275330730987755	0.3698424340688188	0.04316214696903917	0.2311433569880115	0.07109742730106422	0.21717479438130324	0.03328972397616884	0.2575948675003348	0.03558578377624773	0.4583806900685056	0.05488454926547535	0.3872758550667205	0.03304486894804911	0.3995583000409077	0.03318494818419907	0.15147653467318334	0.03713091799295031	0.19735151114792399	0.04788568787562851	0.3330969983989785	0.05045722384965167	0.3564171035515099	0.03790646331700085	0.38077713030073984	0.0600091871525276	0.04250098842061205	0.11197788760839858	0.3925108773915379	0.09360401348149884	0.3563346830879426	0.05833313310229931	0.6693034317513922	0.07290526570257815	0.041179558391669785	0.11344252598336475	0.2522662287232616	0.03649426375570464	0.2974967697736535	0.06306953658243594	0.52365671716171	0.044041976356226864	0.4955739028080257
10794	IRA1	stop_gained	Haploid	PKA	YTA7-missense_variant	IRA1_nonsense	1.083162821431146	0.018180169175554182	1.2024534389221841	0.021392646495092826	1.1828639815377353	0.032090351938302966	1.136070672146546	0.01995683205647179	1.0274016456562958	0.02397420091678754	0.8793359716175646	0.052396748970679134	1.0898847060704615	0.03002179127976065	0.9801593907827134	0.030875857371263193	1.2884806509687887	0.019493665076876325	1.002362583178965	0.026748775108172692	0.5758200163617405	0.03309474006972648	1.252474959825855	0.025880367748104486	0.8811675314118848	0.05102182040737438	0.9344986548792176	0.026127713792884512	0.11971822812067075	0.05110038743806344	-0.6838807848797331	0.061120046783569415	-0.5376122231765847	0.09997071705515348	-0.8571237065251809	0.1927345028141665	0.9933780735588866	0.028519081305465082	0.9992641382456896	0.05596570255316707	1.0320371947364726	0.0247126872214526	0.8973404918394164
10851	GPB2	stop_gained	Haploid	PKA	SIR4-upstream_point_variant; MIM1,tS-upstream_indel_variant; tA,-upstream_indel_variant	GPB2	0.7949414861649612	0.01901798328919992	0.7973780658489245	0.022514935640821854	0.8337336169005639	0.0326203105853856	0.8542023559563793	0.020914744867779143	0.8181499847926605	0.02459538656536051	0.683550650063502	0.051575622521563294	0.8309283019372281	0.02912247200063138	0.7742774759566151	0.030385607025817062	0.920170372296174	0.020127491174707128	0.7677253799683048	0.027863916556569415	0.6340320131401528	0.035840095191746066	0.9721664493241828	0.02677115749468392	0.25251195397013576	0.05168393350941526	1.0513205148916185	0.026592948569572124	1.204998007702413	0.049312812511148135	1.0689327433383708	0.04431495466205215	1.0039667102520449	0.06657516055464917	-0.6238541356777914	0.1044484465067923	0.6250183009761752	0.029549111520172325	0.6607414219461522	0.05671973662915913	0.9431927447815628	0.02543966536697737	0.8175356569133545
11430	RAS2	missense_variant	Haploid	PKA	SPO74-frameshift_variant; HPA2-missense_variant; SCW10-synonymous_variant	RAS2	1.0444119227222155	0.018827074619398476	0.9451868029274684	0.021939077995485008	0.9909898183844604	0.03227554257959324	1.0207033613010823	0.02074174422051796	1.0211553829115811	0.02438242093387065	0.9372673502450468	0.05320564739485631	0.937966135771063	0.030343608770952657	0.9702206707667188	0.03154406407227711	1.0605528664266628	0.020125272643324862	0.8913472889314615	0.027762897429196957	0.5396066067935823	0.03754838941114458	1.1366286989802854	0.02668696774370078	0.8265014122478728	0.051225651556530936	0.7366286249288253	0.0275589094486629	0.15176304833707954	0.05614612686072715	-0.24409287531078935	0.055830452014349316	-1.2354089363496923	0.11347082568527125	-1.038312420454623	0.20415697787671827	0.7951424090509557	0.02904813723176898	0.8948287466986271	0.05648381454683779	0.9145201949097236	0.028123275533268374	0.8830435622283108
11586	Diploid	Diploid	Diploid	Diploid	None	Diploid	0.1501646416459914	0.03489539239587982	0.3900166599362808	0.048587114461049866	0.17730755203032295	0.08994109703585293	0.23884023227977486	0.03614000167938821	0.25428570006721624	0.03792068828638828	0.29842140032541353	0.057326245477582825	0.8139307059673105	0.036518275967174114	0.441108337518104	0.032510028778562856	0.1612616296835031	0.039678328068731214	0.10556009483964897	0.052913472740778934	0.3691991998437242	0.05350698483462036	0.32556374035766106	0.04075528715568779	0.40872791272352293	0.062266059864613026	0.04666025999877158	0.1226002817921212	0.3957653170226544	0.11204387089130008	0.5790450141892863	0.05594666891345648	0.8711856532448753	0.0730861455571969	0.10365024475311707	0.11721564364311413	0.390270061993705	0.045669620623735335	0.266520222547793	0.07002892162226218	0.3879552862894837	0.07892472949600388	0.5523051722283084
11667	Diploid	Diploid	Diploid	Diploid	UFD4-missense_variant	Diploid	0.255992148712868	0.03001473536474846	0.3410423635214687	0.04569595286013832	0.1397455040253072	0.07328486675300906	0.21551238067714287	0.0359784870770751	0.28476001673959084	0.035351181089443656	0.4625340196334426	0.056375220162415	0.4053162865060714	0.03431138320196546	0.4578756203612511	0.03390066989050899	0.16568401802185365	0.03709580466233018	0.126817959454643	0.050056078775284674	0.3907571810796271	0.05250272421031538	0.3877607367865499	0.03757071135749348	0.3359927108794532	0.06014270431686423	0.4028995514532774	0.09077199885098887	0.4672074867741984	0.08772286663543667	0.4242106235769339	0.058129221822697225	0.5466537212353518	0.07462282935240605	-0.015224958463746226	0.11471752488820955	0.3038488394092175	0.03650843568908058	0.3262578918785363	0.06370948707994244	0.5534130804554416	0.040649957864902594	0.5587987479176773
11752	IRA1	frameshift_variant	Haploid	PKA	None	IRA1_nonsense	1.098641342068128	0.018140427856602425	1.107275446832555	0.02138764739040966	1.0900797118842669	0.03208008932323827	1.1737052568650024	0.019898407040325496	1.01633420555373	0.023921633337181804	0.9386923574590256	0.05145649190104465	1.003327468919267	0.028977033685046182	0.9913413029689236	0.03038054435465222	1.2446063142011563	0.019475188306249263	0.9794786945287384	0.02672528174691393	0.5256193217515039	0.03294042615722607	1.2892495874395866	0.025845834473149237	0.861232096946006	0.05101015273052584	0.8849025856093989	0.026116988791098163	0.03444215123330991	0.05097829061782872	-0.41826562100556747	0.05621674543830287	-0.9212436815951096	0.0978591565879797	-1.0549021897140678	0.1856139667393595	0.8821155827834712	0.02847542581433677	0.9022106320694364	0.05594952699183346	0.9768206762847856	0.022729994444161645	0.8674122296873744
11933	GPB2	frameshift_variant	Haploid	PKA	YFL034W-missense_variant	GPB2	0.8578526827825785	0.01851526223608766	0.7579847546894493	0.021989793095742685	0.8204428345124699	0.03231430288910465	0.8800023613300412	0.02035773807471021	0.8136258705140049	0.02421861409309331	0.7605085998706496	0.0508945599836638	0.8068006999487287	0.028417265837904007	0.8243476809740027	0.030100118870751494	0.8942756350950933	0.01980978839911293	0.7251021114796006	0.0272576231042818	0.7161165903243484	0.032893285143496674	1.0085600663570282	0.026251415225688676	0.2363101458911487	0.051314241138795014	1.0357944783797972	0.026258928971531318	1.249221790753679	0.04917092192387592	1.0972920853409585	0.044251086562041166	0.995762829375746	0.06652220392797296	-0.493050453132384	0.10217010972157303	0.5997058840523934	0.02887583980328765	0.6943827745294564	0.05624802208934389	0.9747596240257836	0.02386305182233846	0.8715391777525927
12090	Diploid	Diploid	Diploid	Diploid	MHP1-synonymous_variant	Diploid	0.16978597330305534	0.02428599334961749	0.3646635372950261	0.031701640891029635	0.10413132330179092	0.050819982516805855	0.1956901628056222	0.026762439404182586	0.2811312579870057	0.028561723080870124	0.3240739986430207	0.055144627989200994	0.5245062556205485	0.03380890265383135	0.4072527857287047	0.032379609192152214	0.14997259752652028	0.027448797943236642	0.1359681231250087	0.03774766270379613	0.2662445438107558	0.04255079671829853	0.35422720817655057	0.03108326619874346	0.3635952385636503	0.05512076662945802	0.21271336654337994	0.06673171221029901	0.3919846501703431	0.06973208648764159	0.4876242170656492	0.048814571123017486	0.7737283245763851	0.06833266896718004	0.07877230044234985	0.10520434265553773	0.2410106373332861	0.03332880055068401	0.19986753154752632	0.059948631458335025	0.5035744883505628	0.03820957235476	0.4411760388362761
12752	Diploid	Diploid	Diploid	Diploid	None	Diploid	0.2081696192575989	0.04377081508629569	0.412765662608004	0.0607886248102727	0.21171907144745394	0.12467014322761676	0.17778949761037366	0.04821851316165702	0.29753185103779634	0.04810279022755647	0.3412394642978531	0.05695629684957192	0.5496687530383825	0.03554388941089928	0.4153446532552592	0.033594714371454434	0.04685852311661404	0.056281745533072455	0.005883644925932937	0.07240672397021337	0.31651290617772165	0.0715134006666401	0.3630936539126125	0.05276640279090029	0.3830931673082172	0.07239012481366731	0.6595569453020079	0.1365661031899464	0.4657090662108806	0.15417831869538073	0.6389542893591347	0.06773517002805117	0.7734682380313994	0.08012377715774427	0.09732166356251797	0.1291029999581261	0.3165715218587538	0.050423113329953966	0.28765740719789074	0.07530939480170397	0.42636931974972414	0.08528310039772438	0.4975618143788684
13029	Diploid	Diploid	Diploid	Diploid	None	Diploid	0.24175787178295025	0.025664940754469817	0.3597680658734042	0.035158617418644296	0.1410963997488632	0.0569166484283649	0.1728882830504094	0.028815424629660538	0.3056402430072935	0.03047498239998115	0.5087950903383511	0.05416097486724936	0.3276242968739703	0.03211633193267971	0.4015805620880992	0.03274153632195146	0.138013367691206	0.030207044230542983	0.1347092031606252	0.04072395031474518	0.5062166832168492	0.04428751049009393	0.3482833387634187	0.033874452486505315	0.3593062757335848	0.05571499990588706	0.3704827470391634	0.07399889049587459	0.4725816346413497	0.0763432457291867	0.4479110056370737	0.051470794614488204	0.6316105437708747	0.07041597699151121	0.06666778256661231	0.10719033846844564	0.2598100963088532	0.033147039288401466	0.32110236184477275	0.05982829687205232	0.4801631174500407	0.03669286192021838	0.5033551775230799
13132	IRA1	stop_gained	Haploid	PKA	YER133W-A-missense_variant; FIG2-synonymous_variant; SSH1-upstream_indel_variant	IRA1_nonsense	1.1223751515984306	0.01832092893966443	1.1230242969758757	0.021454822826355885	1.0798700136096235	0.032129718522391264	1.135718148354182	0.02006351551331944	1.0021442123385251	0.024063940084561426	0.9970644095769212	0.05136350438249232	0.8917761313661545	0.028757425831361313	1.0009345944236765	0.03043451367294455	1.1979242846780498	0.01958897069328725	0.9314515376016792	0.027027506113523343	0.5436682071809379	0.034752779384717075	1.2186997436491265	0.026061844032209545	0.8713194416294344	0.051062394699391576	0.8140688371818116	0.026405134280820062	0.19583141647153865	0.052514964474184064	-0.6003473374264561	0.06493491030369512	-0.7590617167561321	0.10945810168565008	-0.5128865521742585	0.21590687374716516	0.924248108196532	0.028556628765362826	0.9841950483428019	0.05603198296567498	0.9148011642095784	0.023365673007603654	0.9044838373966022
13183	other	other	other	other	nan-nan	other	1.1552503116782742	0.018715754418758692	1.194193781365448	0.021669674606535273	1.1689391241616518	0.03224705137436959	1.2159588787152011	0.020475242930359683	1.0853234948699657	0.024400747406366184	-0.002453038824751555	0.060191897194601315	-0.03504274388548456	0.038351897835154865	-0.014013223830535151	0.037587709420095115	1.2605495735589325	0.01986815713602804	0.9764328063182692	0.02775329329421639	0.5271435904063788	0.037786538921871934	1.2729399055888484	0.02661194294133473	0.8555001074829617	0.051292499498700767	0.9025481180322479	0.0270245976332584	0.2913660305446266	0.05510846339538065	-0.4569620632203465	0.06470270844058673	-0.6736575780334515	0.11159911060449744	-0.04881698089723284	0.15278940874799252	0.9632058768305061	0.028870603892516843	1.0651119814975347	0.0563256694621743	1.0034163274910972	0.029543439489396733	0.9914838398218668
13852	Diploid	Diploid	Diploid	Diploid	None	Diploid	0.15853840880113435	0.02715871168373828	0.4077163155349197	0.036830518198347324	0.05729449043093916	0.06317368764364284	0.2022816432771974	0.03003644038838311	0.30615926515754993	0.030787443710270743	0.3465947088873597	0.057049946205715664	0.5293915176055738	0.035929541173854815	0.4027664606694335	0.0334708530051517	0.21563191522121303	0.03094334550151713	0.2313628802512752	0.04235298301638955	0.3554702194660885	0.044392772459734435	0.3314223080174411	0.03381648423905816	0.3555173571254826	0.05755093738549196	0.2552868340101461	0.08335242781995007	0.2620871888372805	0.08830984260626185	0.4416933363222658	0.05376411715001517	0.7330476870882296	0.07150416669867833	0.04668316396439545	0.10888660956583568	0.2532314164721299	0.035974784364175734	0.25515780178274233	0.06227048933279341	0.5530455921322538	0.04440348132270384	0.4364576588267877
13872	Diploid	Diploid	Diploid	Diploid	KIP2-upstream_indel_variant	Diploid	0.18815455204514425	0.028734062244955956	0.3121875327713094	0.039792804651811016	0.10078124749945017	0.06586970873578049	0.21514181008044933	0.03156561283872592	0.2593386266947259	0.032937298767030436	0.3658160374611797	0.054230404630194906	0.5226972889478693	0.0326054927115457	0.4053059929878227	0.031989222304139975	0.14626227709650866	0.033898429834668516	0.16702519757641862	0.044545211805920214	0.4684390825225018	0.04790937832112683	0.3341806251958301	0.03608674160652013	0.37375919993930906	0.05867548275990954	0.2903289174777443	0.08390607066138732	0.3545423657080393	0.08653760744588859	0.5673599418309916	0.052833388364039766	0.840965700315717	0.07058816240797812	0.07247358921840137	0.10946298545454664	0.27182381573793	0.03653156305712038	0.24692508416711365	0.0623721499447707	0.4901547137413753	0.04801431863823	0.4532785720322087
14160	Diploid	Diploid	Diploid	Diploid	YNL234W-frameshift_variant; KIN1-synonymous_variant	Diploid	0.2652781414900585	0.029076002956589582	0.3150470318209529	0.04359924901905857	0.2309250076153689	0.06962755374731576	0.22289604346082434	0.03296726857622252	0.33387070028151805	0.033368525285349115	0.42629959383286403	0.058197785079519934	0.5645950839447473	0.03667807394156738	0.43136813535619856	0.03467766327711832	0.10410713987841687	0.036613511215195085	0.16336070346413686	0.048361140953750034	0.4481242461593887	0.049477860422220535	0.43887718105514506	0.03682909726873727	0.4556852199561595	0.05839895776320815	0.2559231532628662	0.09593086055600318	0.4214077124973357	0.09951088812075777	0.5393254318137733	0.05801349905665741	0.7811579333494518	0.07184405006434558	0.2272592439969766	0.11268395786277716	0.3640302191948714	0.03700051281865238	0.39907851624626695	0.06379623131756973	0.5316556455006578	0.04071431194301444	0.5614636664785708
14280	GPB2	frameshift_variant	Haploid	PKA	None	GPB2	0.8720949337535978	0.01829395343882318	0.7006935395656305	0.021723384557830287	0.7614312549797021	0.03220226944354836	0.8894411627511681	0.020062182081577	0.8073688534432623	0.024013447751626667	0.7441932695674678	0.051440328554030273	0.7875606016723858	0.02883289877478779	0.8406626939113486	0.030401217327666555	0.8445957813515771	0.0196092935945661	0.6712200905294107	0.026906403787188327	0.7590210528553699	0.0320810680218743	0.9803999451426144	0.025995040666705382	0.2604018840368655	0.051143101999695635	0.9942324007836868	0.02611112653972408	1.2766227073324687	0.0491143932246165	1.1232660156293972	0.04422642910714033	0.9750645495105044	0.06650210192367015	-0.6168436148208069	0.10156110944588577	0.6261210255146749	0.028632366723711437	0.6746141880991678	0.056042203214655334	0.9334768195845624	0.021106341608562548	0.8950384496996973
14485	NotSequenced	NotSequenced	NotSequenced	NotSequenced	NotSequenced	NotSequenced_adaptive	0.7062176694528541	0.018513857305900033	0.5830089021414344	0.022274796027997628	0.5854240785507688	0.032449061069167416	0.7068488006563026	0.020217604200746392	0.7327736188637953	0.02407096514336	0.7663822214263998	0.050964067786775175	0.6911727942816983	0.0287688956155738	0.7292090411076514	0.030219686712237064	0.6536549290163167	0.0197937843257273	0.4865889820968432	0.027190625600803136	0.6304003318339394	0.032414099269062684	0.8658572451414142	0.026059060365406287	0.24008471413713425	0.05125218052119546	0.9014420004292016	0.02639205950537529	1.382746522438156	0.049142696733559664	1.2440156648411722	0.044239045344602664	1.591361854745554	0.06648740694086347	-0.01362953167775144	0.10107330108129862	0.5165219255320308	0.028708804138171708	0.606367938415623	0.05609702923161875	0.8346483661808634	0.021751822279151185	0.7259599947176749
14849	Diploid	Diploid	Diploid	Diploid	None	Diploid	0.15508030223824598	0.023496952979169438	0.36414977397731935	0.03083956043953613	0.10460170193806537	0.04922344252643395	0.12328474113169735	0.026486643243719143	0.23550238616713506	0.02801027836468253	0.3120358339513111	0.054727297957798716	0.517848690998074	0.03345951613363517	0.4074100655657785	0.03223510907956726	0.1197923408080904	0.02625896971905896	0.1326073895557536	0.03642922661131364	0.3501250998618317	0.04108141663357257	0.30136582411744145	0.030445217710379568	0.3661304751317618	0.05398543559219508	0.1524437608470155	0.0662671680785158	0.2757362921829452	0.07192188697511105	0.4376103416278203	0.04998930068730556	0.7626858987252044	0.06883703469402128	-0.029777309744547495	0.10580689117418217	0.19039582875724986	0.03291149700960775	0.2120448740110467	0.0593533303622792	0.4645216103628622	0.03549917651556282	0.461408693881443
14915	Diploid	Diploid	Diploid	Diploid	EAF7-stop_gained	Diploid	0.2871976130279464	0.0359393960448839	0.4615505415078813	0.05245749735368101	0.3038830589359484	0.08265907133651303	0.2652207938060239	0.039757567922572234	0.383100266596582	0.04254066717954059	0.38598645585357577	0.0571588031842408	0.4270203776666206	0.03578091121681524	0.4074884861201297	0.0338748987690976	0.18021939356641486	0.045239428675382665	0.08422144215280354	0.061512989889994235	0.3277493375351237	0.06454392302092014	0.35294854201700104	0.046356954060356746	0.4342737945054408	0.06566058380961626	0.4641844974949671	0.1480889475043577	0.2998626940534845	0.1335637382455222	0.4093984262278368	0.08852184104555527	1.0395795213189492	0.08349134564171468	-0.2747450206489224	0.15232653817353128	0.4175402141403664	0.04227454819189979	0.3439430145730588	0.06866734382565337	0.4894507360813422	0.061299592663254514	0.38744942988417175
15221	IRA1	missense_variant	Haploid	PKA	PCD1-synonymous_variant; YDL026W-upstream_point_variant	IRA1_missense	0.9690349622783456	0.01857090745685716	1.055884145979462	0.021760144849920775	1.1975302841971895	0.03229317804727624	0.9140723044277008	0.02069216616042674	1.1355979591679934	0.024189678228264108	0.8121423719852829	0.05324119175998719	1.2402230162024968	0.031084204564743763	0.9802582200833468	0.030896598665779075	1.2188816190781042	0.019848569108902092	0.8810249826040276	0.02734897605710087	0.9659775470459484	0.03333864240389427	1.1803472877837338	0.02618947401705209	0.8406244383271784	0.05110840613786488	1.12330712779025	0.02625205802995754	0.913361777736724	0.049605991136428065	0.8458218994867248	0.04444722237435581	0.0366365804454703	0.06827935940728493	-1.8497141619989763	0.12333609868687408	0.7881019789568391	0.02959668861845265	0.7672479340061974	0.056643353734709065	1.0888648504093044	0.02584714703469417	0.8830498843436004
15232	IRA1	frameshift_variant	Haploid	PKA	YEL043W-missense_variant; MSK1-upstream_indel_variant; YGL036W-missense_variant	IRA1_nonsense	1.1347904636022086	0.018219255482225426	1.1392876859548182	0.02143794106229379	1.1239022800755345	0.03209919735076307	1.1385534252774872	0.02002697088328133	0.966572560267528	0.02404601820554337	0.952375820348172	0.05120875186054113	0.8779546711388672	0.028663854089361306	0.9563255464620662	0.030293014225327437	1.2344172831566893	0.019539064879348145	0.959278789031784	0.02687545944705541	0.437930721961933	0.033830234691206065	1.2644115943814322	0.0259628140061182	0.8765543927283143	0.051031627211241715	0.904560119848641	0.02622121069548417	0.17528959552253465	0.051639703282294336	-0.7203904205650834	0.06504562883553615	-0.7814803295001203	0.1126512477334695	-0.789527435344535	0.18732089205531088	0.8846984211962472	0.02853614966736344	0.9711333701257094	0.056003757312672035	0.938294875309608	0.02562953463393521	0.8936337102675219
15337	Diploid	Diploid	Diploid	Diploid	VPS3-synonymous_variant	Diploid_adaptive	0.5021301898438078	0.024406404177040725	0.4389218034017411	0.031463916192964896	0.4236322188352544	0.03811162856235626	0.5882041479107798	0.025425067384746397	0.6001877841798253	0.02737558455969289	0.6853794792294006	0.05554317991387001	0.8618058442295431	0.032440785653250766	0.7848508937884476	0.03326881877576908	0.44403663890776457	0.02586200645027975	0.3547897006393925	0.03735364951399349	1.0819286710189566	0.036017108609512336	0.8064587727744582	0.029447701377641418	0.1645218220556044	0.054451079348795464	0.7608570553638359	0.03198120946414837	1.1958692445754906	0.0503073344187288	1.4053793736266047	0.04439631067824198	1.6805672695379523	0.06652102888105008	0.2737661510330886	0.10362720226737654	0.4331737037001216	0.03207089377632677	0.4654621813849382	0.0586509682890926	0.9828931571337024	0.027588902623037103	0.9955190616719602
15787	PDE2	missense_variant	Haploid	PKA	tW,HIP1-upstream_indel_variant; YOL159C-missense_variant; UTP20-missense_variant; DED81-missense_variant	PDE2	0.6149807457670166	0.020792848927862918	0.5825678954113424	0.02448100628483658	0.4691426416666538	0.03448606632349375	0.6473930659696417	0.02214955043851283	0.6202190857667433	0.02548249049998495	0.6296755339598368	0.05183804611413331	0.5491177088431628	0.02945246498013745	0.597540147105152	0.03073479664737092	0.6099480301783644	0.021574054399771617	0.44670765135694185	0.030443928107236305	0.5228831024887479	0.04035778844619305	0.7253115023642491	0.02823090743659244	0.3602217394113912	0.052078784965665495	0.6680923276747281	0.03034823951299202	0.8938759227314537	0.0500350302360208	0.9293383165626156	0.04462857380545908	0.979295013906498	0.06671834700000365	-0.2900055368815517	0.1046780423931292	0.4391690400450746	0.031141531993121894	0.4813492534771308	0.058690587233018135	0.7312376132957767	0.02861990616832365	0.7177816103765623
16720	NotSequenced	NotSequenced	NotSequenced	NotSequenced	NotSequenced	NotSequenced	-0.0032422773067486772	0.03295959171259581	0.003215042177019189	0.04963393785889247	0.06647375752338809	0.0840809889139924	-0.027443869914463757	0.040719069334488336	-0.0037167051503141937	0.041776498735967935	0.4519697962187338	0.05828692364535756	0.4148364238017969	0.036376931142688085	0.471092565487305	0.03577266594421219	0.0686486945783466	0.040607450050732116	0.03356307846001507	0.05429880147382842	0.04877557503265285	0.06946275858567658	0.13457499423891692	0.0500512588556305	0.10221298705971188	0.06768152616529899	0.36649884435693975	0.1124814037130713	0.1383128304053167	0.13526538685920753	-0.02222242097098364	0.08076514708607238	0.18953510525159792	0.0920860022640867	0.07020083040429517	0.11731122286586035	0.07237628516389592	0.041363895715392375	0.046650189312321635	0.07124288114688727	0.31320558983359875	0.07875769522992006	0.06954686518431563
17499	other	other	other	other	LCP5-upstream_indel_variant; PTC3-synonymous_variant; TPS2-missense_variant	other	-0.02072845432541569	0.04459196508661236	0.04923291469714314	0.06773992710179358	0.08445727424302336	0.12808710811677648	0.0438683005053677	0.05442197483395092	0.10638521411420583	0.05758159443481256	-0.016525552322994363	0.0638998288765812	0.11589536120698922	0.04275936066183244	0.020172750934223143	0.03792559543854413	0.021194826200214262	0.062032515610846564	0.08099922130860293	0.0717934839991606	-0.21465749405439652	0.09862725265193566	0.11125235646896386	0.07062754993465345	0.08483537551524688	0.08464931658384854	0.10684718444346933	0.16744311656621405	0.23955860110514066	0.18001279937442932	0.04596552889723285	0.10786934791512556	-0.014667816645985087	0.1341155151656459	-0.002376752804013114	0.1415717310564188	-0.05349836943579738	0.06567170880276424	0.022389672624610262	0.09208059958767588	0.2738211011197611	0.15806467392123966	0.10798437592647404
17691	GPB2	stop_gained	Haploid	PKA	None	GPB2	0.9268137800875802	0.018197614344584927	0.7733347399076521	0.02158435786970304	0.7778605809618391	0.0321671199070214	0.9168992711702916	0.019988053970449636	0.8189629121388525	0.0239770605689793	0.8398859558838272	0.05131193916509642	0.7053743695728821	0.028587506668466864	0.8498622758447012	0.030363043541149163	0.8838817070283107	0.01955451541836441	0.6945318872132794	0.026823133757241012	0.7434380734133698	0.03186322994163076	0.9724514424917808	0.02592424274890197	0.20986226730926527	0.051122458629822745	0.9950915061711834	0.026066743949660274	1.2484574303493683	0.049100442869461414	1.150108550486707	0.04421627075995089	1.0212107884669241	0.06649419389002212	-0.4508706864334053	0.10122219878315576	0.6223070918381227	0.028528368754259733	0.7502521386867419	0.05596940214906738	0.9456063569414446	0.019905086707030874	0.9407783274195202
17927	IRA2	frameshift_variant	Haploid	PKA	YLR177W-missense_variant; TUL1-synonymous_variant; RNH202-stop_gained; PGM1-upstream_point_variant	IRA2	0.9666271713084776	0.01994608214889749	0.8094086168751627	0.022959882638867567	0.7946063037998311	0.032885758710939725	0.8494045391115496	0.02206813165475497	0.9030559724287772	0.025146639917080174	0.8011685995790784	0.05360454483636568	0.6066102103023927	0.030669194400089143	0.7717316555166942	0.032015532397260626	0.9144833135644708	0.02102723667710452	0.7299266197163121	0.029980963962391364	0.28347471360480203	0.05088107388389497	0.9414747469655362	0.028599022891525508	0.6554974942164594	0.05179705120566981	0.7757829867566737	0.02914725068905146	0.5729788441637157	0.05223410444957157	0.5096374768190151	0.046145500955566486	0.5247739235134812	0.0699107343260223	-1.7858465593819568	0.21205969821166146	0.5949509937796933	0.03010861849015887	0.6729278006359901	0.05770108667417281	0.7593812030271894	0.03991836418134313	0.7009717883044685
18152	other	other	other	other	KTI12-missense_variant	other_adaptive	1.1180347275445452	0.018120028451902505	1.2276584309968388	0.021387846919898063	1.1686181989826498	0.032079024239097496	1.1676533175757549	0.01993093744611662	1.0224804923575297	0.023972869371431598	0.9913743733121748	0.05123977433333868	0.9372533783692087	0.028655116133733487	0.9780070805474976	0.030250118380407056	1.2885101923993492	0.01948706296852718	1.0000688154424109	0.026742845440679255	0.5442430566624525	0.032829197364340715	1.290538144215172	0.02585789315885221	0.8850060995132627	0.051009101276106465	0.9472960094027189	0.026099228177958518	0.1551572626123451	0.05092809724419119	-0.5271223361001295	0.056616848646655525	-0.739327983355891	0.09974552642648757	-0.8819257199285855	0.17103865254027126	0.9179500612569976	0.028476104425343887	1.015448783282024	0.055938259692346254	0.9713797077996782	0.023314814261196744	0.91056142475328
18200	IRA2	missense_variant	Haploid	PKA	HXT8-synonymous_variant; SSD1-missense_variant	IRA2	0.7436832160412561	0.022609199562864415	0.6901360829784485	0.026452920093232468	0.6523897238446951	0.035239845821613484	0.7892773946917261	0.02480634735801053	0.8427758430745481	0.02584702696699752	0.7858215278664914	0.052817713329160985	0.6001062421903367	0.03059812036755546	0.7353909120736045	0.0316028226784398	0.6938510440091885	0.024242895093688675	0.5780962788237258	0.034626777470896965	0.8224945727220264	0.044624131972177995	0.8818099634969362	0.03009707893346817	0.7120071241994842	0.051744220936178094	0.840738421277238	0.03085631984711096	1.0969788923045352	0.050559872684366174	1.0625742194284709	0.045531581573272986	1.0259767501023451	0.06736811564647202	-0.3664103231991501	0.11145731151891734	0.5595436543691426	0.03351610485637137	0.6375299856369743	0.06089753283854148	0.7643541018705741	0.03120794064238068	0.6934432467194517
18352	Diploid	Diploid	Diploid	Diploid	None	Diploid	0.1835760673674232	0.025214189207728843	0.2499060500622992	0.033268628275531	0.1381949695044568	0.05281814019772707	0.08635970320649057	0.028216493910342512	0.29489777642044845	0.028779642908315087	0.3536705846716131	0.06129348962420044	0.5015768838305346	0.03949498015236722	0.3844877626339391	0.036412009448907885	0.07189871136650708	0.029044175541294126	0.11268667135822967	0.03744874949520848	0.40989666982152695	0.042373558680887984	0.23919810691466045	0.031861497644939	0.4334039276357041	0.054617819403944085	0.3696172020291517	0.06859027962455977	0.4699829525289238	0.0715316193288871	0.5578611362210175	0.04970541633688007	0.7327787932847833	0.07029468898498158	0.02718479866551836	0.10497369310836988	0.2407492223569415	0.03367561488225982	0.24211728714699804	0.05975722150374185	0.4602012766394355	0.033283614330533506	0.5007126654582852
18420	IRA1	frameshift_variant	Haploid	PKA	FKS1-synonymous_variant; GEP4-upstream_indel_variant	IRA1_nonsense	1.0644174168694025	0.017996997811262624	0.9649185835415012	0.021346152027115557	1.0623967587249257	0.03205084333478148	1.0427652633936628	0.019787688801787745	1.0482727901308864	0.023817252542972848	0.9407996373797358	0.05108421326777827	1.0740875537579484	0.028651102286177118	1.044128371303234	0.030152091212854764	1.0910297376688	0.019406954253955253	0.8688630422536155	0.026517738621926447	0.946136985986899	0.03097518751851917	1.2173998867264064	0.02569891662983213	0.7773908788986371	0.05096932302337795	1.0288110551692509	0.025918150218924137	0.9212305118470951	0.04908723303839308	0.7624033402192489	0.04422417971973197	-0.1716594896249042	0.06661935091350114	-1.4763665278811406	0.10244148700586853	0.8755356351988511	0.02838935807631616	0.9565167538950512	0.0558468813774061	1.0718292779357952	0.019123503638554203	1.0232586209330137
18501	NotSequenced	NotSequenced	NotSequenced	NotSequenced	NotSequenced	NotSequenced_adaptive	0.17793744392633346	0.0332586459409822	0.2245637611436144	0.04742867883256136	0.09546839699962464	0.0785317157775817	0.20164871867937245	0.03527773680012776	0.28496108599859243	0.0391623998509748	0.4607486819744886	0.055380324802992015	0.4460590388660247	0.033409756023605436	0.4454249774991551	0.03322543772860537	0.07219641023355024	0.03919220752611097	0.02584573220081437	0.05158628054865319	0.4701140963545875	0.05507220230144312	0.3374933457434301	0.043238620054610565	0.28919429406027697	0.06285918784035392	0.28173364204915385	0.09954956778818837	0.3261397914215325	0.09456438745899502	0.5421023101361834	0.05960729443795852	0.9055590121152248	0.07178620890018557	0.1949451484062728	0.11427198636659572	0.2708201404159525	0.03771283735040693	0.3100805582878501	0.06481849849464147	0.539909724503251	0.05279719422153199	0.5230056596902756
18860	Diploid	Diploid	Diploid	Diploid	None	Diploid	0.20607962688840284	0.02710707450613374	0.3519879763118747	0.03709429246017815	0.1461120799124159	0.06291815261810506	0.18716779255586166	0.029894183738254095	0.25569047005437523	0.031629371826252715	0.4126418599369954	0.055249642648209994	0.3862095528551812	0.033596378377713045	0.3910645316374973	0.03327761011600376	0.13918138728092053	0.031313093414324984	0.1354438296898417	0.04273037596991221	0.3233072623273565	0.04573763875270637	0.34009169301509845	0.03434337646676598	0.3722889373381079	0.05737205418555854	0.4753348083302286	0.0772653881506637	0.35941132354191224	0.0828050901968629	0.4983815829423068	0.051001829070878336	0.6018576923878153	0.07179446319910457	0.02150968468065851	0.10722888628061823	0.2329642721362009	0.034712210862943835	0.2475027927379817	0.06125328518384169	0.5163417154065031	0.0400281008725784	0.5400798344735053
18950	Diploid	Diploid	Diploid	Diploid	TRT2,CBT1-upstream_indel_variant; PAU19-inframe_insertion	Diploid	0.2092868079413185	0.02584357699866956	0.3464246296837997	0.035257142045038416	0.20105939549499335	0.05450522660509207	0.213456331897121	0.028701636483806987	0.23149973468642204	0.0303467338836852	0.4045985795775325	0.05436160734589203	0.4621520530320546	0.03253581347416775	0.41148874722226575	0.03251421381473681	0.16960653184254598	0.02985463633618316	0.10813481422391018	0.041357966500322384	0.450336510558947	0.043694886287159576	0.3605768439864891	0.03309826899509175	0.3359972453313437	0.056353549449949615	0.21956813133635672	0.0709284666098715	0.3924237984946236	0.07390940922725169	0.5847419253061509	0.04931510597701653	0.6578748272923953	0.0702005002077196	0.12686201264759792	0.10576195065729006	0.23617009875213124	0.033799808940493836	0.206050201593142	0.060938576650640765	0.5493832365967535	0.03760282537794054	0.4824224790843967
19184	PDE2	frameshift_variant	Haploid	PKA	RPO21-missense_variant	PDE2	0.7829205795242737	0.018736981907719046	0.8342011446479602	0.02202572684503065	0.6748648812607004	0.0325636445254268	0.7922935564091782	0.0205266378404668	0.7645688713705812	0.024287148728273027	0.7650321999275896	0.052971921665614034	0.4995316976626456	0.030330389631863762	0.7179977117875287	0.0316003465498325	0.7642707415977247	0.020127438116791716	0.5601460932160368	0.02824274798304972	0.6188968118177678	0.03481889806889656	0.9172785810009516	0.0264518241839583	0.6228415630401795	0.051090200452631525	0.8825022712124043	0.026834407367480568	1.196362326197852	0.04924341766810725	1.0420561354197608	0.044326301364341285	1.054173304358401	0.06656803486238244	-0.3214697633720669	0.10177068211476686	0.5551892353698267	0.029103696573902056	0.6616163046148259	0.056630816786320724	0.7606590652006677	0.022384851127317463	0.7575388579471949
19219	Diploid	Diploid	Diploid	Diploid	RGA1-synonymous_variant	Diploid	0.2885588431245261	0.03560835999826687	0.4375331997644899	0.05467955855872979	0.15344361484575636	0.09296156379440444	0.21543179057727488	0.042165112001086975	0.3288691574475085	0.04280290976036653	0.4740078861346191	0.05494146004580595	0.3455195433310545	0.03309456963972249	0.4113235535180699	0.03333519587682982	0.13832255408886154	0.04720459684625973	0.1357771132614791	0.06018694598660367	0.3420916547603553	0.05999481947397795	0.3489333876141706	0.04627159211378647	0.4662330888642017	0.06499296192047536	0.25061496643311165	0.1218851345198022	0.3736128439084264	0.12387199335031147	0.4596541797958335	0.07205751319569753	0.7607327735450706	0.07823880937008157	0.3521708390986517	0.11918618734058192	0.2650268498601802	0.04256636864562255	0.3681007832950936	0.06905800334575903	0.5328087335675288	0.062187481403423714	0.4926047377556269
19296	IRA1	missense_variant	Haploid	PKA	DBP1-missense_variant	IRA1_missense	1.2118794252813432	0.018058989705710723	1.077808421986682	0.02137255458521301	1.0892244977923504	0.032062496307964865	1.2045659382168494	0.019846939560113862	1.0798049988652871	0.02386793428423777	0.9020454348789432	0.052456236365640216	0.7049880528715461	0.029748002405451363	0.8665724302671861	0.03117269662294041	1.2018500816693762	0.019448840847118714	0.93186925615852	0.02663961776033213	0.7415369511661505	0.031593086997749806	1.3029691961478171	0.025783801365334997	0.7363558148105523	0.0510004221341462	1.0278621983069431	0.025967371816738187	0.6523607867587811	0.04921035547406075	0.4799385591926737	0.044357160818548985	-0.3795841988236501	0.06741475394391175	-1.1355181165008192	0.10699716219032787	0.927019434090656	0.028411606181844906	1.0286118593338625	0.05588167982503822	1.0525931532655084	0.019614418021579115	1.0903786607652142
19297	Diploid	Diploid	Diploid	Diploid	None	Diploid_adaptive	0.4961750832889257	0.01919282457434231	0.4591077703344285	0.023712874649848108	0.3682232169594066	0.033492084554715564	0.5004991163136876	0.02091006273492049	0.5015142909841693	0.02454213739206584	0.7399151894025201	0.05133756021364058	0.683290956362098	0.028839012753314575	0.7315920985619728	0.03051696908337644	0.35846695538202183	0.020709413933558508	0.2511006956020759	0.02892567484921754	0.9193782846680448	0.031985901789264574	0.6677709216049026	0.02650010629848621	0.2737018987237624	0.05149791419720521	0.7197132142659016	0.02746418342105556	1.0830843163282815	0.04934627098142329	1.2503203753489758	0.04423341122369948	1.5778486916591017	0.06648575279134107	0.2601083466703366	0.10105987092329738	0.3897249717017151	0.029001314429478287	0.4763352916881096	0.05628126571607445	0.8688910657768375	0.020504683103446344	0.9160446138029728
19379	NotSequenced	NotSequenced	NotSequenced	NotSequenced	NotSequenced	NotSequenced_adaptive	0.3832885692489614	0.060780256613226086	0.28369571022708745	0.10030951163375984	0.3699178845533517	0.1516049491069066	0.18626697067809886	0.06821760622160876	0.3785797041189594	0.06883899614983985	0.5232940265793633	0.05757013981495216	0.4006162428304373	0.03555200113185655	0.4638427166871079	0.035620633102072606	0.10767841072668832	0.08144652112901582	0.2250022553459433	0.09117769985872053	0.5441934071911672	0.09417713736143304	0.3953836981661509	0.07082294514479726	0.4839651977994001	0.0852780104830872	0.6036132455293937	0.21367132969555594	0.5161880453434088	0.19393049569266926	0.6017464858455844	0.1192709189395818	0.6379514982502235	0.10380570863518934	-0.5609945208548838	0.2637445381427411	0.3622134557726712	0.0605895263916193	0.3673847752542823	0.09407224028371272	0.4861723629583299	0.08582333837608178	0.597269836432523
19407	GPB2	frameshift_variant	Haploid	PKA	tV,YKL068W-A-upstream_indel_variant	GPB2	0.8469880308813873	0.02060740665810713	0.7685753598914591	0.02405217639198508	0.7705949630950165	0.033398489140953135	0.8927626059291598	0.02201063338448008	0.8172077110237659	0.025779157131250032	0.7608443178365557	0.051495502592312004	0.7720839039674751	0.028875284987817832	0.8219673150616185	0.030441018566405083	0.8719395192585686	0.02120220642876616	0.7041356936731789	0.02979290622252203	0.7332552019516341	0.0396996332007933	0.9634806040915024	0.02827218823356317	0.2299698782351171	0.05251878192659633	0.9705471259088668	0.0277447534931926	1.1913252453847232	0.04965783399376758	1.1150219974254916	0.044485489929934216	0.9743219790142092	0.06672070824400886	-0.5236829461475916	0.11018896342368764	0.5971368529965659	0.030724882780096868	0.6808936377999705	0.057616016817986324	0.9768688982946866	0.03188357796561743	0.8779504988379102
19697	Diploid	Diploid	Diploid	Diploid	YLR162W-upstream_point_variant; RDN5-6-non_coding_transcript_exon_variant,non_coding_transcript_variant	Diploid	0.2968723770722563	0.02261883722717621	0.17738709051369134	0.030425543384907487	0.1514727962387636	0.04445453044965993	0.2786536390477432	0.024663239421026644	0.357628927425986	0.026979144771411	0.5077578315648558	0.0555099852881425	0.3944578312387053	0.03342770513520432	0.4834520202639124	0.03383704379639653	0.19389762502040706	0.024706881297690542	0.17758840096697676	0.034666182286134224	0.4513031447781541	0.0406970391458906	0.4476239702058693	0.030258952713816893	0.4613903962954774	0.05307341850056343	0.2488637526305874	0.055152687577277634	0.379200493653767	0.06148889200075582	0.4639328630090183	0.049648672039812505	0.5830990563757499	0.06896719993867331	0.009029388876547884	0.10551121126487936	0.2643155216540426	0.030628342145789213	0.2758806785722032	0.05833393265584848	0.5083333457129664	0.027486411133688063	0.5238159931831282
19707	Diploid	Diploid	Diploid	Diploid	SWI6-missense_variant; SRL1-synonymous_variant; MSK1-upstream_indel_variant; MRS6-missense_variant	Diploid_adaptive	0.6214800276171011	0.06120208607356738	0.5951385981315537	0.08689483238759688	0.4815416003778301	0.1417543143768374	0.5982110231975922	0.07307387878372038	0.5429090046699362	0.07452275775358135	0.702903664497931	0.05307837691469633	0.7032684080892491	0.03071670922096197	0.715698148885207	0.031339781461272934	0.5012084959691662	0.08085244555699518	0.6545119341374968	0.1311567265085494	0.8669924173008996	0.08050143967294254	0.6920865353248246	0.060774203838452986	0.5437710120414201	0.08885556889558544	0.9069520343613456	0.13254557254921676	0.8716044536044345	0.11036025789035338	1.0981141404716876	0.06472113048836345	1.297888586883954	0.07693951902123355	0.8214777954070598	0.12565280470159013	0.4786968251933813	0.07053557445042416	0.5221085155284456	0.09221746920888972	0.6700616153161294	0.109254534957051	0.703516511906195
19795	Diploid	Diploid	Diploid	Diploid	STE23-missense_variant; RRP5-upstream_point_variant	Diploid	0.27346957679308914	0.02341728899309884	0.3333799738449512	0.03006080633622605	0.2357004381145344	0.04557610009532343	0.25310663671300865	0.02562349438442748	0.3656777577795883	0.027418731347526527	0.42456707878657307	0.057064274680975115	0.523031197022245	0.0356081788349694	0.51642037186446	0.033831824060494384	0.2361185993336504	0.025197654498905347	0.17750805940690484	0.03502245221934688	0.4818819635993354	0.03972083588613722	0.4677896212811858	0.030001494445240542	0.4200474016221724	0.053999551506907766	0.3069652583495167	0.05620479567718902	0.4127068216428635	0.06237029406907114	0.8740647644547521	0.04654244572706859	1.0234083148263722	0.06754165242303656	0.04674391005137465	0.10556741966944516	0.3280664787514754	0.03187748758992622	0.2844557070986798	0.058567042156345415	0.58351220715944	0.034577760552090435	0.4950098541307067
19894	other	other	other	other	tQ(UUG)C-upstream_indel_variant	other	0.038723648936791005	0.03178352211447689	-0.1342296318100188	0.0527058970067134	0.11460390076768487	0.07323067953326229	0.11871149773117945	0.037883882492457735	0.05599115239180555	0.038952649879337234	-0.009283752287053129	0.0666226134279852	0.13289297379071058	0.04337326076221089	0.0375291188069541	0.04040451481483743	0.08988276774386904	0.039325940067675716	0.12500649023253158	0.04997714693924725	-0.0002557303451984728	0.06800443561379403	0.08188359523539271	0.04718707670043855	0.10304232454211644	0.06757407733950561	-0.05266312942224437	0.1318724096591396	-0.057711751192303866	0.12053777358944735	0.10534947627882313	0.07398889055400469	0.1668974171836007	0.09684094767232923	-0.3345474440543936	0.13430645313340725	0.011410209829911502	0.04260999041275925	-0.07043369733410422	0.07455014409405339	0.1632841009425274	0.092481833322593	0.11310075163559535
20083	Diploid	Diploid	Diploid	Diploid	PEX17-missense_variant	Diploid	0.1851178435264436	0.02608243134168684	0.3812229704805544	0.03511662721808667	0.05363541404904119	0.06096812079226688	0.18952238556399567	0.02861166754043645	0.2695827790343153	0.030198166896287293	0.3983425762081122	0.05672834516248588	0.4927663848321144	0.035113941085971316	0.3961320097671501	0.03390155627131258	0.08686362498904451	0.03057169097816275	0.1220028449176622	0.04048185968225277	0.40765979503513183	0.0430070960502848	0.30491774729725674	0.03319693337312625	0.3588986854528476	0.05614541099516522	0.3129981259521422	0.07615700056446159	0.3417072299109443	0.08095232662258264	0.4458189168864408	0.05204131224109308	0.5845798721943829	0.07145690991482577	0.08080999581277465	0.1062557366021992	0.2693477296019062	0.033799418639439915	0.23578780892126866	0.06048652913994605	0.5770833291032826	0.0400245839801163	0.4166135962075057
20464	Diploid	Diploid	Diploid	Diploid	APM2-upstream_indel_variant	Diploid	0.30832765591467226	0.02700466047653997	0.3870337407530161	0.03728339104593207	0.16895942064025765	0.062414261677234004	0.2580475948491192	0.02937990494206165	0.2697144943380564	0.031158784695377237	0.5030848615305802	0.055171249065173365	0.4054738232724036	0.03307884991560106	0.4196052522537293	0.033327379739431943	0.1883984297261461	0.031404430879741235	0.11639377636242534	0.042422558045616544	0.5621239819036924	0.04390182720480893	0.35838111135226364	0.03476874776165018	0.3695578235262866	0.057503061332142176	0.02623977495268986	0.09119257279245536	0.3609355427007193	0.08133474295360019	0.4422634128964272	0.0511204662034841	0.6920968485171356	0.07039791346853402	0.15184216954585367	0.10695569643454396	0.2541420364561127	0.033996658330815686	0.2862629366910631	0.0606440402802235	0.5440655356453455	0.03471611934797581	0.5269238323626735
20632	other	other	other	other	YAR023C,SUP56-upstream_indel_variant	other	-0.0033652045087085663	0.0312509357912289	-0.08520282140925116	0.04492254953696116	-0.07922899564039868	0.07741486806538915	0.07020219358815442	0.03491252033049678	0.0375010293165708	0.037530177756900346	-0.011733343272442628	0.06382846772531889	-0.004972489381142029	0.04173790918296173	0.037628928987487334	0.03970246243042863	0.014192043870502859	0.0368563157560834	0.04189373991335918	0.047006518801696165	0.20311200373969265	0.05942976495262935	0.035219410144784094	0.044970748476042835	-0.08260320179682837	0.06898356237944403	-0.08270482708264865	0.12702298058263395	-0.20576372003906607	0.13968545854630168	-0.1199513738385237	0.07833119462714007	0.11397466312764125	0.09704864480933363	0.051863901120324116	0.11611238630804795	0.011330396117201751	0.039110212287700834	0.003223693660144875	0.06743351547191483	-0.07438657159848902	0.0952640268427752	0.12306495575221325
20873	IRA1	missense_variant	Haploid	PKA	RER2-missense_variant	IRA1_missense	0.965116224608034	0.018343786724178246	1.0145889100024117	0.021701863887556568	0.9603237408451242	0.032260247728195045	0.9889546265779536	0.02022979648596436	0.95736022284968	0.024101275402203387	0.8435606278845225	0.05159895456246155	0.8327666056607684	0.029101877938243887	0.866107614518066	0.03046512431735995	0.9727698588391098	0.019749180298169508	0.7511575832411456	0.027387301054881474	0.911459561060484	0.03248434511013912	1.0851461735906436	0.02607101515581293	0.5878176824020599	0.05108370570678878	1.1321661559601646	0.0261586017898184	1.4148331242878929	0.04916288789071147	1.1768980748574625	0.04429293053122217	1.1675094593455069	0.06654379012880297	0.05690990117829786	0.10143361336010716	0.7064358942940818	0.029142251212837388	0.8012782856908957	0.05640454072695975	0.9220258251018706	0.02325653116153829	0.8914109534179325
20967	PDE2	stop_gained	Haploid	PKA	None	PDE2	0.7150687286017199	0.018848749743948127	0.7829481503689159	0.0221701535341939	0.6526094778818331	0.032621302045355946	0.7329035888186136	0.020701423434160558	0.7465557462408158	0.024304891734045802	0.6616636946825479	0.05255861321184748	0.6630464744639448	0.030385036495209586	0.7178667420660708	0.031176820643686074	0.7173319660085112	0.020138183240251985	0.5370067839199322	0.028130648291631383	0.6567073255127545	0.03376128906994884	0.8701382622112978	0.026480405507940362	0.6062667965638091	0.051106258828122766	0.8558716054264868	0.0269004175591906	1.1099922237473678	0.04926963769623844	1.02354462211875	0.044337234300706914	1.0445707177710528	0.06657762973066828	-0.3405739767536912	0.10186068631826428	0.5604704150741878	0.029261102209403624	0.5804768721930811	0.0567635621396469	0.7099875750756436	0.02783381134021109	0.7027714448645699
21440	Diploid	Diploid	Diploid	Diploid	None	Diploid	0.1984172780131115	0.049623416377546935	0.4441912119164603	0.0727736742843263	0.0983101089343153	0.14831071813405172	0.20545410516227275	0.05667876046614855	0.2829708413715033	0.05328441836859822	0.33227467305078834	0.06279613811035782	0.6582053027227696	0.04077638069946805	0.4520120704707565	0.03589880241646737	0.09800495896974967	0.06444182689015601	0.181573681940652	0.08145905238477663	0.30208307010530056	0.08115875398009174	0.3790908671887422	0.059847672852336026	0.3877448649722637	0.0742946018731584	0.5842260723812674	0.1843133997926396	0.42908944509224417	0.15989726168543847	0.4235002131535546	0.08661339491978218	0.9120222555415382	0.0800014834948538	-0.09250494196146401	0.14285463505619694	0.31862794982534565	0.06132962707043956	0.231617070802297	0.08551650797337394	0.6092606509606434	0.09143199777929256	0.6133671780841351
21543	TOR1	missense_variant	Haploid	PKA	None	TOR1	0.4692279825791996	0.02168671470276708	0.4784945908149808	0.028989361424150494	0.4161312809240974	0.03740196265983199	0.5096772554557167	0.02378521865677309	0.5080788447112048	0.026399844688934658	0.456021709342288	0.053136002143422734	0.3067882211646348	0.03126299007135301	0.3973323421480901	0.03186585968984535	0.4507037173333048	0.02363011101021668	0.2875312892090817	0.033817959957335275	0.4126489670498654	0.0400938234164296	0.5586945992172775	0.02917584566086724	0.39846291183306815	0.05289669276388243	0.4577732967299503	0.03973931055744702	0.6382424768280966	0.05498670858873099	0.3779530220966302	0.051978102850945805	0.3973234382158352	0.0771630685460872	0.2584994104411754	0.10813393042010017	0.3430462498607421	0.03336112545961183	0.3670057668245458	0.06075990968819744	0.5522626094431196	0.03407825840108316	0.5594213466332727
21625	Diploid	Diploid	Diploid	Diploid	None	Diploid	0.2654453251978449	0.03240129643018834	0.4058598222431308	0.047578336495442165	0.06372864701766716	0.08603592105692574	0.2062354483114938	0.037148297376805486	0.3332154856122169	0.0380708986123549	0.5559362903378923	0.054736008281863084	0.3329941350140044	0.032648119066146	0.4126016407365978	0.03327729500683116	0.08340564350887601	0.04157969156605528	0.15226122860892333	0.056647759160763776	0.3344739506330825	0.05685443273751398	0.3144609804777967	0.04208734692461938	0.3579697769472663	0.061541266145887175	0.4911060858488805	0.09836913138607037	0.4524222240443603	0.1055406504102962	0.5755047540992203	0.058615975785874075	0.7327209133870392	0.0735701518169549	0.08288562901492448	0.11827625455233864	0.33239944810175703	0.03863951769117735	0.34101038590266025	0.06519099279980099	0.6111611472526757	0.042901598078731125	0.5265645336564605
21956	IRA2	missense_variant	Haploid	PKA	MLH1-missense_variant	IRA2	0.8133801789394929	0.020074139545599955	0.9166613176546264	0.02351192788274385	0.7801498087989871	0.033265298356837815	0.8288110562652733	0.022036351429134	0.8663250891331894	0.02501349602119248	0.7096310048577614	0.05275560553277773	0.7187394420946451	0.030682542069916705	0.7516021529281574	0.031221500022599193	0.8073823099454556	0.02157113694918596	0.5990591555355059	0.03116182835503777	0.6380070960488594	0.039362833306955794	0.9712560851520584	0.027622716663217372	0.6230485691672212	0.051441888512325715	1.0455044524842636	0.027889004100855184	1.2216538481301804	0.04969195445197465	1.0522662511419898	0.04466341180468815	1.0213764791742554	0.06689149352765593	-0.5740133719629389	0.10820083515607036	0.6634984741365699	0.03125016352164647	0.6913207680431898	0.05819331990044001	0.7607956795558185	0.034346142600531065	0.7198622243097939
21967	IRA1	stop_gained	Haploid	PKA	HAP1-upstream_point_variant; SIS1-missense_variant; RPL19B-upstream_point_variant	IRA1_nonsense	1.0069587307135346	0.018205731180924417	1.2084629877490674	0.021404142871821727	1.1348379861068203	0.03209668372753306	1.100049894962462	0.019988180709631626	1.0179759631289105	0.024003894427263854	0.8329696404493144	0.051679401491378604	1.0964763573644585	0.029439443125101283	0.9314246362062844	0.030420313224949917	1.283473524146556	0.019519232086633538	1.002480026062306	0.02682501311674497	0.4571284037775136	0.03382997434884909	1.2429355930532355	0.025930483179501664	0.8479838310573283	0.05102921872251388	0.9075218318078421	0.02620346460938096	0.0940876680043881	0.05199554116540744	-1.1335447606065192	0.08089433975751754	-0.8692994929538823	0.13265390341619165	-0.2973144796907252	0.20059915435433864	0.9337373591998114	0.028609364247163375	0.9174672248306311	0.05602217529302105	0.9892778522418408	0.023595505813965342	0.8322822669181235
22011	Diploid	Diploid	Diploid	Diploid	None	Diploid_adaptive	0.7778823323077706	0.01871962625671032	0.7627264569557266	0.022283493184331368	0.6733332499673368	0.032619354130707524	0.7467468495859785	0.020462672211455236	0.7652189461198413	0.02419770666023373	0.901662379361226	0.05067328883321458	0.8293685637255663	0.02834172093217137	0.8884944099336779	0.029974158481044767	0.6254768521916217	0.020190055510407468	0.4910151981726048	0.02813116453605559	0.7996685752413497	0.03252775038846173	0.9741997029055014	0.026221392685536492	0.4890490483894079	0.05116510693988953	0.9782409036293837	0.026571626701816613	1.3428875375921052	0.049192939499502916	1.3353671906943585	0.044225488132526816	1.6111946303356492	0.06648583988017293	0.029121980754069025	0.10102900188166264	0.52161414958445	0.028986896148609782	0.5851908598701038	0.056345261737937635	0.9034501319254236	0.021228164846127974	0.8946259828043929
22162	NotSequenced	NotSequenced	NotSequenced	NotSequenced	NotSequenced	NotSequenced_adaptive	0.4138226101243289	0.022363058794044908	0.564359510657305	0.02669129115813865	0.4349413851733832	0.03785584002271845	0.4096075213695355	0.02520170048124032	0.5439874406219805	0.026411428590842456	0.37537680902081777	0.05651644617885317	0.6588606926183098	0.034707291357880116	0.4869570912169716	0.03247033231781861	0.3922395800681957	0.025113285902136653	0.3127092612944921	0.03514771376632255	0.5848430596588935	0.040759593997567393	0.5191586081026907	0.029909510674558593	0.4011648710940915	0.053023380522230094	0.49325901077958395	0.03893361710666175	0.6939198498162436	0.05410387996412662	0.5610159863443654	0.047498174437654264	0.7041931900191346	0.06968578174734989	0.16539983666257502	0.10392216209511616	0.4722639656510173	0.0338037793885476	0.3500584823700306	0.06006808054973015	0.4753488480941145	0.04940327500678072	0.3794290886312145
22360	Diploid	Diploid	Diploid	Diploid	YMR018W-upstream_indel_variant	Diploid	0.22339744887567425	0.02821510427822132	0.28419478594294506	0.03864603596904869	0.06312848890572732	0.0643276898416678	0.22342163414134605	0.03000511647019464	0.2816806970474781	0.031211107961771112	0.4521836600360266	0.054657013361337006	0.4106554137550157	0.033342638328891235	0.4570099814603519	0.03280519504117828	0.16504469656143667	0.0316818352210342	0.09816519301090844	0.04482240667943646	0.3946077289984548	0.047999910894924384	0.3734942997298141	0.034573898991854486	0.4312443165496112	0.05718262174284335	0.3623549166476103	0.08149469279368635	0.4447859381564517	0.07863091572287198	0.5857543891155736	0.051481251223220885	0.7008152824602829	0.07055323870723325	0.0979998586173261	0.11043905394401976	0.2949092348067346	0.034536379479446565	0.2371183897598245	0.06216588186156466	0.5653832262644058	0.0383677639360908	0.5209309981131162
22372	NotSequenced	NotSequenced	NotSequenced	NotSequenced	NotSequenced	NotSequenced_adaptive	0.28885523673524444	0.07677785321794013	0.4946065793012797	0.11104393930657604	0.3570799243213559	0.197762001362117	0.11859973706757695	0.08267635603949422	0.38996269040196	0.08259364819652927	0.3800260730039959	0.05772627935490305	0.5622955618562815	0.03658630512767586	0.3971231251744532	0.03425445474834148	0.1641881514716154	0.09087302014306277	0.31680043123732743	0.11702243770129812	0.398884493611918	0.10368595174766113	0.2675115419098709	0.09547994516310414	0.5583490064496893	0.0956763843296794	0.1484612195784237	0.2953492538956238	0.6743596995599974	0.23903317496909854	0.5596293854478908	0.1366355108109521	0.7501461031523411	0.11059958195004337	-0.18388196224834216	0.2643738982228536	0.29705545424493085	0.09156876820959428	0.29574083162450826	0.11657056626003892	0.6133485456812309	0.11548901577097405	0.7518890604035222
22469	Diploid	Diploid	Diploid	Diploid	ALE1-missense_variant	Diploid	0.2647189138416847	0.029113492711985725	0.3131456506043917	0.039371989482945034	0.11329518522017253	0.06317368961265069	0.2391884151441875	0.030511045973684533	0.32440687993818496	0.031845412166595005	0.4578530624889013	0.05770398773546793	0.3600512499115902	0.03567525190387225	0.4805267921802958	0.03516444345424705	0.14865914994070314	0.03218803711468072	0.0835089356076346	0.046228996009866456	0.4812046089373272	0.047553591456986684	0.4196432317793765	0.03471036661839593	0.4293397081969237	0.05734746127419847	0.2520600142518914	0.08101384698704342	0.4763033193341675	0.07946385753725592	0.7266651906363251	0.05112385131694429	1.013604384366467	0.06825957543648359	0.09285984348521902	0.1119463212184966	0.33208188286567714	0.03395378369787752	0.3404276673872552	0.061266071612029925	0.4990357746020049	0.043704899976789016	0.4938812822099596
22669	NotSequenced	NotSequenced	NotSequenced	NotSequenced	NotSequenced	NotSequenced_adaptive	0.209980927091396	0.037892221097866205	0.21736733312529072	0.05799596846431771	0.22360767482406727	0.09714603457836056	0.1344419398225801	0.04338111904298257	0.2214018096824527	0.045481519117858506	0.3236147818484233	0.061384035310806974	0.2478725431216698	0.03976945242339528	0.33846388817823825	0.037639094983647065	0.0753005029743665	0.04952801523235823	0.17488239548660475	0.0617091738316007	0.23265116833311494	0.06978282943306155	0.313274061563714	0.05057803738175297	0.2875331589882495	0.06887376631662062	0.2525359953948737	0.15011514080001398	0.5130694091259878	0.12381991717589068	0.39039693121356345	0.072094348622778	0.487223402178415	0.0847543262355603	-0.025833860437386003	0.13629471431127949	0.06149292002159432	0.04939170915996107	0.014918349338532132	0.07625426723654362	0.5625202804906988	0.07314621699712281	0.412333729727736
23688	GPB2	stop_gained	Haploid	PKA	None	GPB2	0.63630542821878	0.019444835071957163	0.7715139280460859	0.02281818460080342	0.8110049601589718	0.032806483850200636	0.7844296781532947	0.021628660740396228	0.8266708623322414	0.024858609648672626	0.5461450701598339	0.053804907204824025	1.1348641975003018	0.03171170737404302	0.8221053332808609	0.030791363118287892	0.905790794357068	0.020259125976485857	0.7230653265053875	0.028112274814955502	0.8394824351388971	0.03418747333824392	0.9522195765354726	0.02680575277478321	0.2607143865135278	0.05171642743589154	1.0368506372518804	0.02665349311390082	1.1886809834854637	0.049346399338195526	1.1280523983980506	0.04431134101258268	1.1101084161499084	0.06662536474965992	-0.7309048681113727	0.1040444712903404	0.6156269566068145	0.030671233970697667	0.5389830829047987	0.05735398821166145	0.9694322679450612	0.03548582673936232	0.7541350599068716
23868	IRA1	stop_gained	Haploid	PKA	YNR062C-synonymous_variant	IRA1_nonsense	1.1084114813836279	0.018132418191230945	1.0352947404230315	0.021396831103293996	1.0910835551243294	0.03207682001549514	1.1348354095447422	0.01990564380255184	1.003288875169686	0.023913166342307626	0.9379296323943696	0.05181596806827524	0.8315439437692072	0.02903889827268225	0.8677239572769359	0.030717168031938462	1.1957533186735059	0.019474139877954846	0.9778809110609508	0.026726303631088532	0.4859755577177613	0.03297414310175128	1.2572364749753475	0.02588033768132916	0.8354071202105631	0.05100964944680129	0.833377315651913	0.02614033659027613	0.049557823904414613	0.05127390229307112	-0.644287451005511	0.06116529103457082	-0.7664001234658248	0.09679722989438057	-0.6866084689316604	0.19146149029686335	0.8306413189753863	0.02845261987092413	0.8867103265498432	0.05594312070879557	0.8694378362517428	0.022722163850112442	0.8535399828148285
24151	other	other	other	other	nan-nan	other	0.14813836264899927	0.08293492968042919	0.020714971104336642	0.1306750988553826	0.09793604075656176	0.2254135206126386	-0.03303502241369052	0.10273435489797064	0.1045898784933703	0.10144548794958816	-0.06937255142480707	0.06301586578329132	0.06099058581407139	0.04124815010909303	-0.03707189884930736	0.03805424117178904	0.04601176175530202	0.10219586611840108	0.0018389179822158753	0.13381083187661116	-0.24773516970776915	0.1837606461278535	0.029182798538450582	0.12210551657722453	-0.045670490597734544	0.1444352369374399	0.3374469329627006	0.5671233381794639	0.3046794043058913	0.3670834202040459	0.022001859739008832	0.21921656944418727	0.2851541316255332	0.213959485487186	-0.468115134659217	0.4345517007439265	0.131384820847059	0.10397239496169164	0.1335008104048915	0.14741835435059972	0.3668132409623436	0.21757974699720412	0.20446386439285866
24737	KOG1	missense_variant	Haploid	PKA	None	KOG1	0.7905997498331259	0.019183810583046967	0.7027435556232497	0.024013780293793183	0.7105412424382271	0.032898395359051334	0.8310876079019273	0.020762439644384626	0.8556906348888451	0.024491371579044373	0.6291339338197708	0.0521095358433335	0.6322356377011531	0.0301416878587014	0.6134052461631578	0.03076651633973667	0.8179918463863979	0.020256370717427027	0.637602117310415	0.028079893646015888	0.587032332417386	0.03512947452178836	0.9762799262052734	0.02661051653891929	0.3169312492518855	0.05169252921720725	0.8974473570688231	0.027206887849942994	1.1011572115728403	0.04945765583630316	0.5483990364704939	0.04748717999540025	0.7557970093930058	0.07038030773999647	0.027418334700689048	0.11322337717123278	0.505029612981121	0.03073253798921899	0.5311976268250119	0.057677903416070764	0.8372593816041046	0.027223922335761545	0.7520873886908865
24858	Diploid	Diploid	Diploid	Diploid	LPL1-upstream_point_variant	Diploid	0.24966021069000485	0.027115863895995337	0.2473433176515309	0.0395671908702653	0.1329732278250217	0.06170852163141481	0.26678832089450905	0.030256545084989067	0.3240520443824164	0.03132253345433353	0.4537354007899447	0.05395323346231585	0.4572421983527304	0.03213129619198805	0.4585279049138961	0.032304305014661715	0.20713523799164688	0.03141285499624251	0.22728802548320826	0.042728259139849935	0.6108880290692923	0.04483139873354918	0.4635960880446248	0.03466148555453425	0.447273369366125	0.05664458148986622	0.4747369524888895	0.08006600984658582	0.4434380236701329	0.08030474544544088	0.4793309845449194	0.054586711324216296	0.5968925626470121	0.0725545325584102	0.28257197095100256	0.10861684338964103	0.3022362317593339	0.034309559786069026	0.33485835444123435	0.061663806401919825	0.5740434198469506	0.038917184034252435	0.4925704630980179
25531	IRA1	stop_gained	Haploid	PKA	None	IRA1_nonsense	1.0477585752267442	0.01827877528341615	1.183553653784815	0.021461892360128583	1.1835426386049328	0.032118676532313685	1.107664076231473	0.020056888706410928	1.0395533079726502	0.024044233719612892	0.8521970736783836	0.05154170226903642	1.0753655959840729	0.02924763104303467	0.997744219665018	0.030313073484557886	1.3183029876148296	0.01954487308218961	1.0373863078797492	0.026916192846198613	0.418179733113914	0.034692696727849484	1.2948254505692611	0.026034774344597063	0.8928124428749341	0.05106708343897697	0.95379043473347	0.0262616858521554	0.07118728784240007	0.05276695024759328	-0.8557326093131103	0.06928913490255971	-0.6780108438564549	0.10847649034867962	-0.9447374948206708	0.26056372449149284	0.9288974490295041	0.02868933160686325	0.8498380535152309	0.05617756186944879	0.9829048802555572	0.027815028544283468	0.8327005465779997
25747	IRA2	missense_variant	Haploid	PKA	PPE1-missense_variant; YOX1-synonymous_variant	IRA2	0.7393619284725256	0.01974297430035894	0.7830207046036964	0.02358720248045344	0.6338948296948616	0.03348820594821412	0.7512498357973484	0.021588976459946032	0.7483891029878877	0.024889753486807838	0.7222590661426784	0.05140968982710597	0.5518794980604486	0.029085832276665724	0.667018530950301	0.030548884544529836	0.7708779315921548	0.021066688506941284	0.5821354009402147	0.029778175028128188	0.5822242773034472	0.0387459501158671	0.8515686928514231	0.027485860537848333	0.4254813149562089	0.05160382026750205	0.8030691602671006	0.02839715154611795	1.0837560186813948	0.049628498099413804	0.9448342076330812	0.04451898044118875	1.1173120233533518	0.0666542713923834	-0.27948425990050024	0.10684283588004888	0.5570895087057037	0.030457687900906187	0.6015050794090487	0.05773387044147566	0.7699679591389732	0.02823440489387307	0.7310758494672986
25780	IRA1	missense_variant	Haploid	PKA	None	IRA1_missense	1.0448363743904672	0.018219721751626783	0.9842292425645276	0.021501418292241677	1.013922564325505	0.03212904036182943	1.1409380009665648	0.01999249652861784	1.0344603168094313	0.023960613366914515	0.8963835266164856	0.05122033156573395	1.0260675683246765	0.028818411460407662	1.0328697807868994	0.030236376814306427	1.127778051584178	0.019534187016093656	0.8902516173462974	0.026850231530278486	0.8474362712535219	0.03210706898744714	1.245654098003248	0.025911156490445047	0.6312090822352879	0.05106197682052297	1.1488859556419295	0.02605020008698266	0.9817956464261126	0.049176821710848105	0.9091012713261531	0.04428532305095188	0.13877619375693745	0.0667884570513758	-1.6698663203975492	0.11081877734522157	0.8343662722625339	0.02860069340142306	0.8366096259755499	0.05604301485574889	1.0624526615760663	0.02308692717387733	0.9491341007452428
26106	Diploid	Diploid	Diploid	Diploid	None	Diploid	0.19493150577116536	0.025342880645996657	0.2998842278642884	0.0334724848511177	0.08125089054977927	0.05543138730288686	0.119748741838389	0.02811884485780776	0.2478150119209248	0.02965801023493715	0.4204310282798642	0.055609546688353065	0.4880578759707914	0.033974167015681137	0.4045648521297919	0.0332466231348357	0.08217935701533897	0.028831811276913564	0.039623045865914114	0.03896293642067375	0.4712004073572624	0.04276031396362216	0.2702202849802577	0.0331014556130288	0.4514470482909621	0.05473834868270059	0.19304537461820495	0.07168613282727179	0.5094744363240488	0.07276930734794926	0.4995264209374215	0.050455624411974334	0.7826928273629079	0.06905040820385261	0.04700608103892486	0.10615403951098323	0.23189862274875336	0.03309455412556519	0.275670966003752	0.05950591039537882	0.5509959853815326	0.03288130585733886	0.4990426658137362
26612	other	other	other	other	UBI4-frameshift_variant	other	0.04213550804985715	0.042435633375517916	-0.02293050752810215	0.06255269930244849	0.030806616728776142	0.11088636233565248	-0.007757830689836742	0.04963779960779662	0.05739432168599338	0.05169769725240568	0.12329602999965415	0.06132375166340129	-0.1167042493115686	0.038751304325921096	0.05366760341054791	0.03996187473970378	-0.006258840705987393	0.05341737661918175	-0.04056030734274504	0.06712872293253935	-0.02308691071127785	0.0905060437873942	0.09355512679343364	0.057918244075939276	0.09917135588291796	0.07856036812709344	0.008324794744871506	0.2061411997341574	0.2011757747588848	0.18303050567078086	0.10998605481121557	0.0944333096581649	0.1573237082065678	0.11776859248432768	-0.0192303592888459	0.14196572341935024	0.03777980771921567	0.04747443973510415	0.07352463765457683	0.08132761505094296	0.1375175382224286	0.0920600558606342	0.1691852954977563
27346	Diploid	Diploid	Diploid	Diploid	None	Diploid	0.3453561232192543	0.03472826869522422	0.16472198411120054	0.05381565260623004	0.3722675031574267	0.0639463290087477	0.3306293039335905	0.03629741781901382	0.3259440658600769	0.03679542301506408	0.5221220353618616	0.05695065335859535	0.2998835283819985	0.034670347800170274	0.4801031048158549	0.035360950230306644	0.2491994651546224	0.03895501589637273	0.2361098996381502	0.05557149673069792	0.4580513366609794	0.05905113075529096	0.42082473583395263	0.04275500268504336	0.3986700003895446	0.061615260771209324	0.6742888101307977	0.08286686581441402	0.6776028730657563	0.07953863313972932	0.5527113163263591	0.061005757345163024	0.6081732845798816	0.07808950446103985	0.15371677647941867	0.11861194507709907	0.29670970237614497	0.03716908705988887	0.3463541626674035	0.06495042128042801	0.4699513093480479	0.05004803947608502	0.5151192127708246
27473	Diploid + Chr12Amp	Diploid + Chr12Amp	Diploid	Adaptive Diploid	NUP157-missense_variant; YPR015C-missense_variant	Diploid + Chr12Amp	0.2918109050315977	0.026030036094514947	0.4185049204938231	0.03160296113531461	0.2497463794261207	0.05523040589522296	0.2817831094580861	0.028113326565230242	0.3754155068982834	0.031001920574523813	0.3959002690106767	0.060989817214280914	0.1822756421101516	0.039175699630325016	0.33667944077925666	0.03795046141727555	0.20654905929317166	0.029826017948319038	0.25655956000379204	0.04075974579402752	0.5772844586989775	0.04309427766507492	0.4819886575240076	0.033461698419089164	0.652675755942329	0.05344211751268471	0.32802588069232164	0.09759134611076142	0.3727601393649453	0.09509841921524706	-0.2440258296899981	0.09005725593706633	-0.11169895644946784	0.13774212522986493	-1.2576536717721107	0.2117032784213621	0.2984634018011266	0.03798149754923615	0.3574719486410827	0.06487513917478438	0.19106272618705392	0.0496051160071046	0.22039337704176865
28533	Diploid	Diploid	Diploid	Diploid	None	Diploid	0.265178682916781	0.033108194934498195	0.3391778859350352	0.047413444771321214	0.17741346963266727	0.0723146792722986	0.25576229635398123	0.03696228532143391	0.2692685196010011	0.03823485662137435	0.3845705549199076	0.05531266728450434	0.6199444876436739	0.03386071697744897	0.41233953316970734	0.0326029860411953	0.2263468170153377	0.03993206993979443	0.15991446192667838	0.051309266521135474	0.5395634248167627	0.050353737817449486	0.34775195478473625	0.0403741979564021	0.3377163052088512	0.06275377170786023	0.2529320115630716	0.11169937927669447	0.3848833603805682	0.10154334713467936	0.5431690279856745	0.05537697143242321	0.729751575990277	0.07289583508745008	0.1402960070376922	0.11079027500311836	0.3479082524012053	0.04130047746878585	0.23712569831565405	0.06796926596555752	0.6170077058830891	0.05296368905910626	0.5218784111737665
28740	IRA1	frameshift_variant	Haploid	PKA	SRP101-synonymous_variant; YER138W-A-upstream_point_variant	IRA1_nonsense	1.164737504033357	0.018214936398305525	1.1143884442426664	0.021426453079187197	1.0857327058803492	0.03209697820458467	1.178063024983255	0.019967351178979145	0.9983525565428062	0.02399638202261937	1.0246179288100823	0.05088105854788151	0.8319704433337513	0.028335256781279475	1.0012294153594286	0.03012295469989565	1.245986201385491	0.0195165212180457	0.9553071544960832	0.026852215170445514	0.4583698988176482	0.034235499559811144	1.2569284995868324	0.025972434321960943	0.8591228140375061	0.0510343103074299	0.9069993175233758	0.02619604257852827	0.14655349887760427	0.05126966257846998	-0.5370751053805379	0.05801007070766469	-0.7226768421482203	0.09800379442258116	-1.041477141075163	0.17439464481167066	0.8986049819178155	0.028494395466749582	0.9650219337702078	0.05597790596281266	0.9063464239088588	0.02250545797990201	0.8992673339330663
28888	Diploid	Diploid	Diploid	Diploid	None	Diploid	0.21682089300177512	0.030495021818626712	0.009046520065453544	0.043849218091989946	0.10555844029231197	0.06714168691556058	0.30910322500579795	0.0307911848052708	0.31026068348619856	0.033234391587214626	0.4967444579752927	0.05583431934271625	0.3112900341051698	0.03394657723092127	0.4319279931535594	0.03459820467094598	0.18105930006020884	0.03236493988362288	0.23571567503038005	0.044033269174883184	0.5728845440282245	0.054201352463520834	0.418703605061336	0.03830283619493945	0.438214804046968	0.057964933773142276	0.02270713717977041	0.10253651247572483	0.20433789910204955	0.08208439194804404	0.4188370508736212	0.06232304360098374	0.5817584350146493	0.0744678015482909	-0.06562044677608116	0.1303283999990203	0.2717518435470009	0.03522308284030773	0.23540182243887545	0.06391514654911175	0.5154848288628959	0.043031585228775135	0.4119436632771149
29375	other	other	other	other	nan-nan	other	-0.04017561551306882	0.02921713444448046	-0.0034336712262319747	0.04236560576940762	-0.007790982741036145	0.0711915007053852	-0.014811683588612118	0.033894090434193384	-0.03218216524819127	0.03706685763042472	-0.05463442320409165	0.06506014210195077	-0.010493281223867916	0.042834079352552436	-0.045111702549631566	0.040447669399848826	-0.009466030542155009	0.035351205618519815	0.0245863569464918	0.04411761512195582	0.024904342465562727	0.05522426236199116	-0.0242305670987924	0.042405637467202786	-0.0034024944048871245	0.06493736213611019	-0.004587403206739357	0.09710027016042612	0.041103934779773636	0.11381805929686925	-0.08523136542343558	0.0685689233732567	-0.059176510949345076	0.09475304997995228	0.05731651357628899	0.11265752003547885	-0.013530378131246228	0.03806701514740697	0.0022264755898192034	0.06622839725510686	0.11721680799015766	0.07075820872730366	0.07405146213459568
29473	NotSequenced	NotSequenced	NotSequenced	NotSequenced	NotSequenced	NotSequenced_adaptive	1.1903073761626284	0.018197745805023112	1.1198884925598525	0.021417060535192274	1.1358252468066454	0.032088920312843466	1.2137773546555826	0.019956884043501055	1.0400707141492536	0.02398811622080673	1.0869096927211268	0.051414846752425115	0.8569802681841663	0.028659289723571436	1.0162054376839786	0.030440219342705167	1.2412306455944702	0.019514109661176858	0.9769238377385518	0.026833546731181327	0.4640794681674577	0.03393945847970229	1.3249883710758947	0.025937145903334114	0.8687477562687714	0.0510290568656005	0.8632275239079115	0.02620351736932618	0.115198463461683	0.051312254545687976	-0.610554213079048	0.061342940163605315	-0.8850959475728354	0.1030363689987564	-0.7949395467574932	0.2080279373451213	0.8995927748412121	0.02847872563258848	1.0093826057416	0.05596542589120388	0.9656644505759338	0.02177935198343956	0.9480769835883588
29840	Diploid	Diploid	Diploid	Diploid	None	Diploid	0.2627085480775817	0.026287274081835538	0.3704213066324333	0.0359336941701599	0.13098758913946462	0.060445184988957734	0.15999166327872735	0.029160860316764955	0.30492977347697964	0.030281614962467306	0.4888953376333814	0.0562641125961262	0.3916512141096437	0.034457049045901286	0.39390971838631017	0.03432217211830657	0.12552373596838648	0.030937329822608894	0.08654918300878214	0.042296648994168726	0.4256600057418549	0.044193031789205736	0.3212883682705305	0.03399957684568223	0.41839686875662413	0.05623248148560153	0.24567297880009206	0.08382398541513257	0.3658410515236556	0.08412202058292367	0.4398103571736056	0.05204880430477802	0.5991285375319448	0.0711859850598839	0.0840852900746176	0.10766944899060207	0.25046598534725484	0.03367759473763515	0.3397505964327834	0.0601020571886773	0.5354510647460389	0.03335650925241456	0.5423862507629297
30578	IRA1	frameshift_variant	Haploid	PKA	None	IRA1_nonsense	1.0232521969211352	0.01864086745507402	1.1663862974257364	0.0215501299174344	1.1544124478175315	0.032177770457569366	1.0974104010203691	0.02033798618017516	1.0388239396769678	0.02430461389763444	0.8630624782517894	0.05218626042007589	1.0603626858804511	0.029879537391691868	0.9510750320907512	0.030761505809578267	1.2317280680790046	0.019773349140497543	0.9865122920806664	0.027399938643562296	0.5013936678555221	0.037186367827314014	1.2507861977082435	0.02634272307101524	0.9158438467375064	0.05111593009172756	0.9238241897813314	0.02657239552467449	0.1841132879731984	0.055298150717476034	-0.891455446586799	0.07856739274880635	-0.5441440123054038	0.1260556057323317	-0.6851820783050816	0.2581052537858258	0.9167525467913438	0.02895650162481561	0.9465492064240496	0.05633141463415649	1.0522648028669592	0.031029581418909977	0.7796262900131766
30769	Diploid	Diploid	Diploid	Diploid	YBR027C-frameshift_variant	Diploid	0.24774745955874736	0.03104793061890892	0.3643602600329267	0.04602338538023242	0.2188454440220725	0.07251515597793225	0.1645918132771761	0.034708312972950614	0.32480782254242585	0.0342329959181546	0.4504233125368277	0.058259341557968115	0.4738100450272052	0.03655196721957992	0.3977227447706015	0.03493017615600544	0.03978041940093295	0.03960834205734118	0.07253124141651199	0.05086322388840736	0.5186955467088269	0.050433366129690994	0.2943397287716649	0.03797072204979837	0.4324534950546495	0.05920705252834496	0.3001172637540226	0.09757204287026852	0.41410693893139866	0.1002078786311722	0.5328830024853222	0.05498975187302793	0.6922917567811029	0.07252477722079177	0.07649870654531495	0.11194478559617146	0.2709362292338262	0.03852376044975304	0.31054458038488275	0.06402926911312963	0.6515563903867911	0.04107451454790069	0.5414787133427276
30795	Diploid	Diploid	Diploid	Diploid	SEN1-upstream_point_variant	Diploid	0.2632975396310994	0.02589588960040819	0.3219851160297533	0.03590104695451739	0.13650549949999566	0.05814638087592991	0.1230616232873272	0.0298408350085748	0.2983491789931789	0.03140144887438743	0.5209403821504959	0.054961310460220514	0.35960752609415364	0.03308947774698213	0.4270109993400974	0.03340562465296295	0.07002957145502879	0.03138393898012767	0.03236435289485668	0.04238459519671062	0.4290297539935968	0.04503132262752412	0.3365453147825888	0.03385978510979575	0.4090049794332787	0.0555916598818824	0.34114667106525304	0.07526751639899952	0.5279766414198471	0.07319390107105657	0.5070756482335524	0.051813266341730835	0.6005550638848984	0.07113678055847697	0.12319472860152095	0.10667705998511616	0.2889339000569707	0.033604505709524064	0.3508490203537901	0.06050871118195901	0.4955298133890797	0.032716446698956916	0.5413176822525845
31360	IRA1	stop_gained	Haploid	PKA	YOR032W-A-upstream_point_variant	IRA1_nonsense	1.0945571471372069	0.01815638789442816	1.1591213098212896	0.021419551583425667	1.1335729551335507	0.032086108287124944	1.1317192803189462	0.01996351346252564	1.074524889414768	0.023951381170532998	0.9192362463845268	0.051465966578736505	1.0686549949066881	0.029056044621603362	0.9857941541912332	0.03030788215056896	1.2684644206845386	0.01951422007343905	0.9876553886728188	0.02682297572661475	0.5677244526238374	0.03313881786573388	1.273876740234117	0.025900712899463527	0.8409097484927344	0.05102918448547688	0.9246509797759408	0.026137987975397202	0.31056453054939426	0.050333133484431546	-0.4661783213804291	0.051673928868053234	-0.6674199138916511	0.08631217592235417	-1.233124549638937	0.1564465189910137	0.910770482546232	0.02855365007483358	0.9582953839649532	0.05599590752793219	0.9964186617076146	0.02171797302989302	0.8969166986069784
31607	Diploid	Diploid	Diploid	Diploid	API2-upstream_point_variant; SRG1-non_coding_transcript_exon_variant,non_coding_transcript_variant; BOS1-missense_variant	Diploid	0.2557701272945591	0.03150543004753397	0.2942765706367761	0.048240855942972775	0.1482346651873508	0.07978441066277299	0.2238164357980443	0.03423804741203964	0.2630948955066799	0.03597602053936931	0.4614241613789508	0.055351558658665485	0.3798461056950928	0.03340419427697798	0.4250879677759645	0.03344851576275374	0.1452790388023819	0.03765592250055097	0.10528449868085196	0.05130671040756918	0.5511453467778495	0.054337996457660916	0.39897666989436026	0.04027846208969575	0.33414578773669623	0.061537262573267075	0.56252365856429	0.10961504176773464	0.6217277114468487	0.0927654941956431	0.459051211618957	0.060758571901305534	0.7658822800327285	0.07184531200603303	0.06134683980835405	0.1175300668180498	0.2403424089585169	0.0382356054636482	0.2970017546779728	0.06534620775356396	0.4888395366281624	0.051275087504078685	0.465673142807408
32075	Diploid	Diploid	Diploid	Diploid	None	Diploid	0.2314170110795521	0.032209393008551614	0.17458094545918248	0.04959381244102297	0.07848458389804969	0.0790777785009373	0.1966068081902544	0.03540299854611798	0.3066627128736946	0.03633900033039636	0.25082873737194084	0.06998708316470513	0.3726476819197931	0.04785753359075797	0.3251595095813887	0.041583476615044	0.1762767605777915	0.038517208788565516	0.19239467153705728	0.05085648745238749	0.3732741691325651	0.05635169043981705	0.31983215563789025	0.04099485393668058	0.3558688527486783	0.06090780847455029	0.12594894414848873	0.10689021288256888	0.2510991401805345	0.10057507926127736	0.4582813544220232	0.06347903381847783	0.4739543777703575	0.07682395082997763	-0.0735702007207586	0.1205864211195602	0.29162107548604543	0.039054698973376004	0.17832708403500436	0.06761870765367481	0.5450167409709282	0.05418907369518729	0.4632153629808594
32201	NotSequenced	NotSequenced	NotSequenced	NotSequenced	NotSequenced	NotSequenced_adaptive	0.2557127239328201	0.03913332022352122	0.1954593976293285	0.05950821862387647	0.2477945687726296	0.09482592839613686	0.14122386342030052	0.04539583534181156	0.2787528618757642	0.042309939144969416	0.42229068900087385	0.05717094436178854	0.5069305288588069	0.035647758838217684	0.4417904299791681	0.034581322496246486	0.17656412076817893	0.04723286255976964	0.13661711688435035	0.062444776002606665	0.3439357104665396	0.06540282086625009	0.3732790190866925	0.047774864389755006	0.3815137509532927	0.06502597791041795	0.3663118271679745	0.13430429837996194	0.5017066087869335	0.11520673014377075	0.4210322465110287	0.07202844717709757	0.5898523137402538	0.08182131444052264	0.08458667799552874	0.12964490739710144	0.2329758461215267	0.04471475482463352	0.2640118023998932	0.07168327526985728	0.5898195943265171	0.06302516096921383	0.408119659436395
32262	IRA2	missense_variant	Haploid	PKA	None	IRA2	0.5007440724639178	0.020093570694065026	0.5217632631261044	0.058385199937274326	0.4834740920383144	0.03423022540402302	0.7199572387622845	0.043240688977158284	0.6845844840954531	0.040744572481056784	0.450900323451512	0.053227126393909266	0.611119044120709	0.030911589269538683	0.5299101763601856	0.031340306412988135	0.5841840836495269	0.021527034552187373	0.4467522697902757	0.030174352102612087	0.531835747267553	0.03723058961410863	0.7084217159956206	0.027834029351725943	0.3138407646693569	0.052016158283723433	0.6347362120798615	0.0300568130727167	0.8446923622821555	0.050112499167511	0.7992528608343467	0.04469351845261467	0.9674816567135364	0.06678832047297438	0.00811942567305249	0.1028058545203846	0.4242024718198704	0.03131376712996213	0.40779581363980255	0.0583248712734313	0.6101765304169336	0.03305770205925655	0.6105293351183105
32675	Diploid	Diploid	Diploid	Diploid	ECM29-missense_variant	Diploid	0.29428618252097544	0.039631250693756816	0.3611608064090209	0.06110496807876958	0.15807076930963376	0.09901489392183804	0.2541211808617107	0.04393768204380447	0.3719118878822866	0.044152008992440414	0.5135628772513751	0.05476306767449827	0.3430680734240565	0.03284133025144965	0.4586936361463369	0.033247922779750264	0.2162824295463308	0.04975961688008231	0.12471479728052452	0.06829968510946756	0.2579844115740228	0.07099390947803202	0.383910140836806	0.050357216028985616	0.3639735076909539	0.07148649163874891	0.31540233625184244	0.13743626478487506	0.4494451331737903	0.11289426591017912	0.4369787859930235	0.06852588615398111	0.6241641777670397	0.08075845582694842	0.30846834661283085	0.11504065170249783	0.26378309563074465	0.04345220516108885	0.34676420466631624	0.07016452330565104	0.3622039906663832	0.06455843443958885	0.4704765986998286
32685	Diploid	Diploid	Diploid	Diploid	None	Diploid	0.253334678249477	0.030191361222047856	0.3177600036312795	0.04272980060441735	0.197167049323998	0.06920077388583235	0.15596797422870096	0.03423823048065565	0.31132057318407597	0.033693671185566564	0.4732128979332357	0.06049275445428786	0.41761126855066427	0.0380093246875918	0.4415999406077238	0.0368850322451608	0.14680249810477136	0.036167295880312436	0.13012685267075486	0.04868342415074823	0.4893892888160308	0.049311261826885854	0.3575117209204915	0.03710793546539007	0.4427100234206601	0.05877695157582395	0.29478057398002344	0.09908213308631783	0.327039623749988	0.09169841492828852	0.5079505087455123	0.05489636964989952	0.6764307188961026	0.07265506394854862	-0.043798890998848	0.11258079430710856	0.2847715569439898	0.037320783681427286	0.331393769532902	0.063647236575885	0.5325702432989601	0.04016940659201202	0.5438611862904983
33617	GPB2	frameshift_variant	Haploid	PKA	None	GPB2	0.8472213802056234	0.021798856496633604	0.7248839462427575	0.0259007183845273	0.7980198147880524	0.03408564346760752	0.8696459466358004	0.023903873560691975	0.7672789063194958	0.026953503780158948	0.7990515988394341	0.051197441831127635	0.7378217962477384	0.02864182338797181	0.8079789810543078	0.030396389441371886	0.8504479387013841	0.02259340458336755	0.6995312549200239	0.03184000015250441	0.7990607606819661	0.03984664045293422	0.9770326065320152	0.029457067461825692	0.2897943650897597	0.053195145448630084	0.9850058687835562	0.02836512267377497	1.3203387472618646	0.04991182517582525	1.1186862235052957	0.0446414042817889	0.9489846239064402	0.06689493366209398	-0.4713524978286553	0.11112565748385893	0.6105397831763923	0.031510430723766754	0.6895687777905143	0.05833822755009525	0.9055257243349716	0.035548736017982696	0.8678308903669156
33976	Diploid	Diploid	Diploid	Diploid	None	Diploid	0.22191055076858648	0.026545596564212477	0.3930111469698465	0.0359490055289001	0.14875975386301188	0.06110884496437809	0.20653993010563965	0.029809366864550633	0.2545268545673697	0.030939456054626162	0.41318710942551595	0.05551111043276897	0.4706673580848546	0.033959635861253494	0.3936538066625704	0.0332097913470542	0.17250932185141096	0.030085482156103082	0.12729659639649898	0.04158380920088479	0.3958429735698446	0.04720224949573242	0.36518781418408497	0.03405619150195649	0.36541980340100144	0.057330692414937004	0.4311256698618144	0.07279556927676081	0.4203487637858681	0.07501898978162401	0.5985375401937093	0.05066422514422212	0.6596348216929563	0.07025700849853363	-0.11063224068940868	0.11053218530528748	0.2822896622061276	0.03463751930504741	0.28496652111477605	0.060949649374805535	0.5484674127898904	0.03861573285017703	0.4706989900718415
34189	other	other	other	other	nan-nan	other	0.011140187861859044	0.034124111574341004	0.0986902088193178	0.04604994787055263	-0.019580709294928268	0.0852785548764847	-0.026740518155590056	0.04074634331998051	-0.08231031138251371	0.04388396360315658	0.07487382426871594	0.06102394093172631	-0.03270429455659407	0.039288730104262405	0.024320356222259986	0.03809856677644348	0.043566144314217854	0.042672295519330036	-0.0730138948544989	0.05634010240777845	-0.20991879967119825	0.07572081593424093	0.003197034540191607	0.05012590326859341	-0.06313283987534074	0.07686073982432648	0.13194359909245296	0.13377714675914534	0.026764831090874252	0.13793930080710962	0.04384422797044465	0.07624036201020712	0.09036288974111856	0.09944043525008736	0.041381748011043634	0.11664269092891667	0.01882012006795753	0.04280620565145235	-0.03703426355018867	0.07271119989613531	0.18439291674458694	0.08085481301350074	0.08303108261059744
34808	Diploid	Diploid	Diploid	Diploid	None	Diploid	0.23974472605189365	0.02881061014823508	0.3641230310768513	0.039882839219553705	0.11806442225976445	0.0682703926379186	0.20079212860285334	0.031993990570389014	0.29705011518794955	0.03319854043643501	0.3689424022912299	0.056355586843289424	0.4730123481900008	0.03478954998370348	0.4129416217620247	0.03357327747503692	0.13881341403062747	0.03461269472424965	0.04626876772839092	0.047054400640696485	0.4504613940384478	0.046498621708579685	0.34575527108308257	0.03619240176158688	0.36330689617570905	0.0586519587142833	0.16996412555734502	0.09670208292381614	0.3925631076765581	0.08670263318777098	0.5065871363845937	0.052765609675230994	0.9261032269199116	0.0696174278242237	-0.11611792855079155	0.11151112965367838	0.27408205819341946	0.03606377921694895	0.27960060342771625	0.0625629964770039	0.6409993687745463	0.039950128358551724	0.5568222119046783
35898	Diploid	Diploid	Diploid	Diploid	None	Diploid	0.22901800312220186	0.036620441438108935	0.3294707972374566	0.051351064590492136	0.11973258205354975	0.0889335739996753	0.17977235543895198	0.039233667226536005	0.3394762255874736	0.03856291355016683	0.404909687793248	0.0562830545609341	0.5305192504517988	0.03479021505246231	0.4482939584623253	0.03343013312371591	0.1267437551533862	0.04488888933618946	0.1154260973650223	0.05715142233908195	0.4158844897621456	0.0552843729594066	0.3418647031198291	0.0422656858258858	0.4427006740766054	0.06328281017920437	0.3649548646823424	0.12169844105375995	0.3616866612504737	0.11681453176408048	0.4840170548170298	0.06366612063907827	0.6322114134264196	0.07735804932153971	0.14156309260928882	0.11921032832806733	0.22839859151229466	0.04296919379287256	0.2498231481661111	0.06936848171112077	0.6019582806697261	0.05325381726179841	0.6015733160786251
37238	Diploid	Diploid	Diploid	Diploid	None	Diploid	0.2702450991664333	0.03199281613174257	0.3668040309124904	0.046315980811527546	0.16046473987758614	0.08290561304871202	0.20320894719927848	0.035159660832394524	0.33100863106208445	0.03680492505084272	0.5162063586789574	0.05641268193414025	0.34560998331859555	0.034137557467704166	0.4304409002802085	0.034335561143502565	0.1638425895795035	0.03936844048408157	0.024023893327270927	0.055429491138773525	0.5435397817811505	0.05503670964776596	0.3810104050182114	0.041616501986115814	0.4330283312128533	0.06138038830933947	0.24404935798694585	0.1086004352969106	0.4481896108643833	0.097494218259818	0.5204172314980233	0.0585046074697909	0.8012032842587664	0.07215821630100266	0.15470985271659998	0.11468029382070367	0.3654723016559583	0.03725989389280809	0.34413231920803344	0.06435455617357667	0.5790728345434067	0.045036684210164935	0.5196471993016125
37241	Diploid	Diploid	Diploid	Diploid	PTR3-synonymous_variant	Diploid	0.11839963974930645	0.026167878288222025	0.3191401277966	0.035719221278854976	0.1498028229751368	0.060079368990228574	0.17388194201583906	0.02856062292845755	0.2370070465979463	0.02953485406528693	0.3718240541784375	0.05609773089338265	0.4770386364967802	0.03486694533979428	0.44423562413088	0.03324361488988863	0.1151772491753756	0.029519633501514462	0.15129993958783453	0.03883577122021351	0.3876114990654416	0.04279827083401093	0.3022889359691756	0.03326437520519773	0.3857303558582788	0.05595598636077002	0.36721726807982297	0.07326639267522114	0.3013717805764451	0.08374384184538633	0.4027494811614784	0.052187539224322725	0.7999995194383978	0.06913627644961724	-0.07975356013567482	0.10732758792061052	0.23817926377710294	0.034551491867186875	0.21068493469712826	0.06079908339212869	0.4538415310714605	0.03911172941342884	0.4673803296796669
38775	NotSequenced	NotSequenced	NotSequenced	NotSequenced	NotSequenced	NotSequenced_adaptive	0.18794473522302824	0.035311337096869226	0.27517723883495226	0.04768261576860608	0.10883622834053172	0.09124791413102144	0.0883260476641523	0.03900424709903001	0.22583205358027095	0.037232225591476265	0.3997720548469615	0.05586785739931063	0.47211793133407204	0.034408686627257684	0.4046236318109259	0.03355849377972546	0.07357672628600605	0.0413286874120607	0.07613429350370947	0.0524749382008612	0.3528770808928615	0.0539217922647224	0.2585720548580287	0.04187055631897349	0.35271449144883754	0.060651783921687526	0.3556963728313897	0.10504471748717796	0.4663807474489341	0.09780445107338064	0.48637479851634396	0.06072886971619086	0.5514612929012659	0.07602318141464237	-0.027948299533428717	0.12219803148019455	0.2610359931785987	0.041762775367731854	0.266727235277447	0.06684366032204406	0.4722173748787803	0.04752601359349039	0.5052089529115306
39066	other	other	other	other	RAD30-synonymous_variant	other	-0.003438082150849201	0.035960694519195084	0.008109437583831553	0.05476869349105175	0.07085835921415927	0.09011961656966536	-0.01898071093856251	0.04453262986036547	0.04194382105422635	0.04559750784845382	-0.011736102016636036	0.06678542049154522	-0.130109826751538	0.04493427242855124	-0.024530513354079585	0.04303498894616856	0.07287881294240102	0.045725869220611615	0.06791285071729714	0.05935618295192663	-0.15154786813873994	0.08153490454519625	-0.00410584171491348	0.058992441360405136	-0.0014155069084016403	0.07503284681615999	0.0850254088531294	0.15746315633583585	0.091222535057559	0.14373991147643142	-0.052965897435931567	0.08896110116918611	-0.057016710640797774	0.1148079078851084	0.033868864115117366	0.11992938066190148	-0.06829380428514446	0.04592523602517912	0.029427142380338063	0.07483771571461405	-0.006280612922296746	0.08906794290666016	-0.05272058269873029
39270	Diploid	Diploid	Diploid	Diploid	CDC11-upstream_indel_variant; SAC7-missense_variant; SIR4-missense_variant	Diploid	0.2140543120887467	0.03317535003942855	0.426482963512832	0.045003087721685424	0.2453248899876951	0.07967170856890993	0.30169496832776155	0.03581775680092802	0.3807406382269699	0.03814384368775815	0.398488083128964	0.05800787851346007	0.4993752403193269	0.03637026822545908	0.4590545007005096	0.03452719923820183	0.23725040031655956	0.03849270798770582	0.19280863743944385	0.053366653390382025	0.4132578881352443	0.06118585613776065	0.4060179125233049	0.041915514574350735	0.4406010238624714	0.06227773887636792	0.3270385129923569	0.11371254998520387	0.4031242475798785	0.10230405369392533	0.5397030032696121	0.056146635962664435	1.0771949624960946	0.07038110619546932	0.21183649082944905	0.1149822324897394	0.2674512066855203	0.04031921479032476	0.2875444604708384	0.06544935440738663	0.5863280420995883	0.05191354272169072	0.5188564588534028
39633	other	other	other	other	RPO41-synonymous_variant; tA,-upstream_indel_variant	other	0.038819790117617485	0.03892768710964492	-0.17649532102319027	0.061423151504077574	-0.08951626695802976	0.0990449363858048	0.12347553551645915	0.04168094986960093	0.057568497920219876	0.04475301934149285	0.0456484945655249	0.06224296781474788	-0.051197875963134916	0.040913583277335235	0.03737446273831962	0.0400668477117206	0.011960901519284577	0.04689392066361977	0.05363428723694829	0.05823263646835514	-0.013600914834599529	0.0844272172663893	0.09423779935514448	0.053479761915524636	-0.03923302814927706	0.07950259148241935	0.10454016249922088	0.15240450278107207	-0.10533924198290376	0.16065432362438709	0.15206663185104696	0.08410718774862767	-0.1930712856093796	0.12014670765699233	0.053591356228767886	0.1272497923741386	0.04669353551097472	0.04551720731184685	0.013028075098874015	0.07896975878144409	-0.10933415506167513	0.1233125911366296	0.004116765346550303
39674	GPB1	stop_gained	Haploid	PKA	RCF2-upstream_point_variant	GPB1	0.5748335296135088	0.022732092571735096	0.447809131591578	0.029262407980868207	0.3619333677575725	0.03935997314907972	0.5376020415991942	0.02518862167600752	0.566265095631249	0.027121566769998884	0.5058411692438044	0.05355466423499347	0.40827747201601655	0.03109158526930837	0.5127691702507774	0.032050027473464526	0.3997787045323968	0.025713087193097284	0.3084863054720117	0.03639666072770412	0.5974775613362083	0.04171894721841248	0.6599381907089658	0.03028971201337612	0.41569059643079787	0.05334194878550738	0.4560497607461442	0.04174653795035261	0.6967409423538868	0.05423292179982203	0.5555800612095276	0.05028664631722853	0.4906632447398571	0.0719102741887822	0.2668382577405342	0.10651248477864647	0.432625252934768	0.03259886068876065	0.4960224708015756	0.05990334415812095	0.4711538657578628	0.050606055261638916	0.44812135604323533
40409	IRA1	frameshift_variant	Haploid	PKA	None	IRA1_nonsense	1.1099834514892897	0.018424249032478992	1.1494313697345264	0.021530553949881414	1.2185845154959738	0.03216473511118255	1.0387503567312912	0.02031977757272396	1.1350423276956716	0.0241183742647947	0.9786321727193488	0.05162565792194725	1.0778233226603953	0.02914682113360525	1.003091797676415	0.03042225998254922	1.2687156675356608	0.019694966612915414	1.0088935199969709	0.02714017872848301	0.6912316529520789	0.034666013946657165	1.2702421298392788	0.026141585849207904	0.939065973566852	0.0510871109059366	0.8766671027238124	0.026457429376560256	0.3139148095770793	0.05310516483018162	-0.3233577851320316	0.05808534746084335	-1.047290393604308	0.1057739454441237	-1.0931965917740356	0.24580665261784915	0.9382475249575488	0.028791546810267563	1.006003351813907	0.05620033667831187	1.0560401033478537	0.02289365415187217	1.0192643224410165
40779	Diploid	Diploid	Diploid	Diploid	None	Diploid	0.24781499243883096	0.02284453630288134	0.3080673680282569	0.030636705653830417	0.1867087444432983	0.04711081247697786	0.1823218055720663	0.025662160458724416	0.2396093197839224	0.028244190737715964	0.4896207188858309	0.05268995756525882	0.3323122666340719	0.030801976778278874	0.4113808224778577	0.03165988156081033	0.12622760967093646	0.02623881532213134	0.05955355394154412	0.03655048059450823	0.452816692653574	0.04024820765040832	0.3565735526809828	0.03056570762356521	0.3868071879411341	0.05407955100855581	0.2735860528752168	0.06103933683148573	0.34741178872537265	0.06730020145245899	0.384705017906566	0.04915490063887765	0.5950278689122659	0.06940747890123053	0.04048735320182818	0.10520154263199004	0.2379743037416159	0.03149452347451833	0.2782441885369097	0.05859057032160497	0.4524898606220895	0.030129854159992926	0.4823442317239448
40865	Diploid	Diploid	Diploid	Diploid	USO1-upstream_indel_variant	Diploid_adaptive	0.5263516545545066	0.020851991919356886	0.5425819658952897	0.026335055310590057	0.4095194544997013	0.03582025679221892	0.5449806610289111	0.022669208170678874	0.529824632241046	0.0257285534451873	0.7403871046347124	0.05231168067535358	0.7412588888472744	0.02960544939751282	0.7272591518882314	0.031090218042891832	0.42018473672603424	0.022687147367163974	0.32870022051980996	0.03233775461394682	1.0473320572974507	0.03340547872917535	0.6979291165914739	0.02770094656814475	0.18620623824521926	0.05273636242863927	0.7828295978198712	0.02978370677287635	1.105535063565931	0.04986342973749147	1.300824028471197	0.044268526963704515	1.6477095227331866	0.0664945425419361	0.3785657748796597	0.10138048002512276	0.4504625837018469	0.029894889837470788	0.5351817870162899	0.05689425404821881	1.0133141568514257	0.022727309395408582	0.957372394517656
41484	Diploid	Diploid	Diploid	Diploid	None	Diploid	0.19086013511182465	0.028863711821908025	0.4166567652702735	0.039729537884915685	0.08466680730616682	0.06840170441431521	0.20745226579672008	0.03222856731187576	0.3016391508977106	0.032292459816745306	0.3399538804439102	0.056488933851169425	0.5620639485728326	0.034906547003665384	0.4171029548279533	0.033185065112741836	0.15953456410879507	0.033051043489212666	0.1279088672618407	0.04634948074270196	0.4069460233690514	0.046832224559386716	0.34091772355134736	0.03610634972822605	0.3817187707859829	0.05824063695608005	0.17327473606025992	0.08877162201111033	0.3568283292737513	0.08430446692292624	0.4700248472424478	0.053332304324213216	0.6403809154378511	0.07231961595358997	0.002956038350745871	0.11031912241795	0.30053806305102354	0.0369449968142032	0.20358040045048906	0.06315842883247495	0.5661674197892934	0.04553505350311632	0.4992506906582616
41601	other	other	other	other	ATG23-missense_variant	other	-0.08938153300070945	0.046642018013200025	-0.07203429938570641	0.06849807058564378	0.15085714913968412	0.12536450591216622	-0.061403273609707584	0.0538166853942363	0.013449340893521969	0.056050222494632936	0.033818764219249835	0.06555110633700764	0.1031200886162788	0.04315979502170137	0.0389604458948536	0.04102226121774346	-0.13664981090621334	0.06211499474546137	0.02162435528655598	0.07029177572521207	0.05861542801579407	0.08956504528509705	-0.08338457567057078	0.06922970636827068	0.09953066794313872	0.08398830822298166	-0.09512392242827694	0.2063585260241174	0.2919013132250159	0.1952490447347024	0.1424419289061324	0.09478572184685656	0.05697454897156985	0.1241416197341762	0.35092760664317235	0.12382879253782272	0.032263115459238594	0.05427216668901013	0.019938461834181492	0.08654315513825799	0.09677215808268827	0.16137798092086802	0.2583592612573087
42575	Diploid	Diploid	Diploid	Diploid	ESC1-missense_variant	Diploid	0.19113643027305896	0.027203688719268176	0.2728957381468729	0.03825912612580677	0.16172817968053982	0.05979039593217009	0.16951984123870362	0.02935372006307868	0.25460544536592816	0.0314931837508945	0.29346623827931817	0.05618421398605623	0.5135410706256951	0.03512931605175193	0.3810210979210061	0.032880581463680766	0.13833374026166548	0.030510676201660605	0.10208943691981412	0.04229053337648242	0.31972175067053626	0.046330763554743415	0.2799409688593796	0.034102217897324136	0.3528581191889988	0.05727738148851715	0.14535240780137915	0.08529965008390171	0.2775433120130632	0.08236927947267396	0.436893158409028	0.0552287941714707	0.5981908112384451	0.0719676760638681	0.014108327227978659	0.11132600472332184	0.21752256286244806	0.03668853115705335	0.17534104305031173	0.0622438034203603	0.3587138744710456	0.05046743572304795	0.42345987648416
43155	TFS1	missense_variant	Haploid	PKA	YPL168W-missense_variant; YER135C,tV-upstream_indel_variant	TFS1	0.5293960316143136	0.020891545231319808	0.35640667270972204	0.026210969676010217	0.386735493119664	0.034743453076518216	0.5111420696560947	0.023217741830819042	0.5073874842826437	0.02581548446040296	0.5951357378199724	0.051779671013418835	0.3386321579274798	0.029377877230667725	0.4993951308074678	0.03099311409202337	0.5237459581678927	0.022116648482288243	0.4348981390320116	0.029647208945120383	0.20569779383041625	0.04337502060517359	0.5702846713680326	0.029268087924169968	0.08672373863075984	0.053647216411664464	0.5810107395137589	0.031908064795199184	0.7679970659292485	0.05040142415659018	0.7833103909623184	0.04467271197953493	0.8158197432629537	0.06677692537903286	-0.6172519278935863	0.10936090943983327	0.2846605347657312	0.030960595588235194	0.35217675759902095	0.057958049485537434	0.6722739360698219	0.03616064408494412	0.5604906604548598
43361	IRA1	missense_variant	Haploid	PKA	YGL014C-A-upstream_indel_variant; PSY3-upstream_indel_variant	IRA1_missense	0.7552200395802707	0.01826846529737024	0.7459381167687438	0.02170633297988708	0.7231907522342043	0.032230489203620094	0.8018809654671897	0.020070713653524988	0.8190250513122482	0.023970839356406117	0.6597944839749461	0.05254796860741059	0.8361631695512662	0.030221220659047258	0.7982125882166625	0.030936207763692256	0.7613320085132513	0.0196267292218281	0.5662311124423239	0.026970905697071963	0.7740411768962393	0.03184344477954396	0.931762116928771	0.025919659091337355	0.4730722622546805	0.0510616162752076	0.9109140853547916	0.026166046894847854	1.1239510096213785	0.049131971887348885	1.0443072887475937	0.04425039493396411	0.9646378457718522	0.06652084529146256	-0.4789939348612702	0.10159792131002048	0.5865061010243943	0.02874063379190035	0.5954632123217236	0.056114480455581456	0.8745221247105102	0.023167000181700047	0.7899337167240262
43692	CYR1	missense_variant	Haploid	PKA	None	CYR1	0.7704197929475808	0.01911917597926477	0.6998933172608224	0.0228516287337636	0.6890016083851519	0.03270659006432067	0.706402423359642	0.02113454251469185	0.7685142040868358	0.02458073349514927	0.6968726982285677	0.0529215192200167	0.6448314583088748	0.030467421141220093	0.6786731716592292	0.03133122227872207	0.7119123133251208	0.02051759365101129	0.5377365548607924	0.0283626461959301	0.550415336933997	0.03619812982675085	0.8687298387670125	0.02689177460372702	0.4231502810487664	0.051412112171660494	0.8292076657063544	0.02719959348227937	1.060987848391003	0.049471521109102176	0.8593057494030175	0.044385897793845816	0.6690064908437506	0.06679782790063164	-1.0989414295339166	0.10721060347749184	0.5160433439166712	0.02982263131314235	0.6004518136855814	0.056913665076260826	0.7585470004926617	0.027247721806980863	0.7595364357558343
44777	NotSequenced	NotSequenced	NotSequenced	NotSequenced	NotSequenced	NotSequenced	0.24249810568486965	0.08774506393096705	0.29402879843906704	0.14410696820088928	0.2425309456572584	0.2471328800499285	0.4756921414090027	0.08078217915011003	0.24276308640061614	0.10597814463414224	0.4451746223960424	0.05731088982176144	0.44947935169455067	0.03543011120582204	0.5131492759672062	0.03480294640911122	0.1554972477711951	0.11094952377390656	0.4023823384922806	0.17428502143433836	0.2830148193654502	0.29384844775456137	0.5586858423058066	0.12688107260483197	0.4626356616033987	0.10975901080497437	0.6277870055101246	0.3565651793054692	0.6971236758943208	0.21155580635610585	0.4085336918605692	0.13557177135703366	0.6866931300548192	0.11247179426020687	0.4130808278919267	0.2363987815557933	0.2201443762842004	0.08496484636387291	0.3672635439823703	0.11888934141980888	0.484012945991343	0.12245001949557673	0.5318090879431638
44905	Diploid	Diploid	Diploid	Diploid	SNR3-upstream_indel_variant; YBR285W-upstream_point_variant; SCW11-missense_variant	Diploid	0.2316455265378816	0.04184220468901362	0.3630208994993057	0.06491864242985823	0.16667774152041853	0.1192872089146487	0.23734013460536715	0.046694239394230126	0.3248224186681363	0.04895912046607461	0.4731510382038209	0.05421942526437367	0.3976695336536297	0.03242161581023848	0.4091888003772491	0.032638401652496776	0.15233067582960896	0.055259190551093004	0.1922282195065477	0.06909563337557689	0.5185406653317676	0.06447269328655376	0.2942491103668925	0.05212769153290543	0.4126440840849132	0.07092496977740577	0.43218207354524985	0.17055922210997618	0.6040590701333224	0.1400564494639171	0.4736460499785954	0.06879374738329477	0.53981351325549	0.08767551528768391	0.24752251826286897	0.1282043735032181	0.2249872280940468	0.04800197811174558	0.2826969612189824	0.07379476062595927	0.561436211436523	0.06006240547013038	0.5574172202559929
44966	NotSequenced	NotSequenced	NotSequenced	NotSequenced	NotSequenced	NotSequenced_adaptive	0.1810467940334896	0.04687065200625636	0.1431018912336355	0.06881250106953304	0.11181690903190107	0.11121745553426282	0.2661994489840432	0.04746817571493895	0.3987921335848073	0.043339110082741966	0.4255077277713889	0.060739889369650274	0.522811847634324	0.038685196667656456	0.4706937166276178	0.03643477937143712	0.09196130720388496	0.05419165797909537	0.18619106164810087	0.06884542456503609	0.4772929932671836	0.06399174165656828	0.3543231186797645	0.05381121059558831	0.4685514091285087	0.06776903632160126	0.3454586023828745	0.16471736373909227	0.4041974388744276	0.1308603981800108	0.3624727700909673	0.08345407874020153	0.5363280702327216	0.08310489818784274	0.06529830664696831	0.14169330022412396	0.2634327266135468	0.04838951556323503	0.3920269367283154	0.07792044467984659	0.5718446583436871	0.06639541379370686	0.5096380491979182
44971	NotSequenced	NotSequenced	NotSequenced	NotSequenced	NotSequenced	NotSequenced_adaptive	0.26190666717711525	0.033223877760193844	0.18368162628370568	0.050799898306797465	0.09111797918809117	0.08333964647426012	0.2033094009267639	0.03634750975136741	0.3089538568248717	0.034814731931791534	0.5094127439168497	0.057432308926857877	0.4656612986104348	0.035486190117135004	0.4802821314408592	0.035134858198065035	0.11736903923631647	0.039664303826585	0.2343810987277905	0.0501093079204791	0.5182447659743555	0.053647951679124686	0.41434795506549815	0.038971721284690716	0.473896245907998	0.05919415280238364	0.44229909178812776	0.11568657020098505	0.4184265492785968	0.10207776254949937	0.7310097615002628	0.05693039254535369	1.079487864415451	0.0706039532577978	-0.0215968340629569	0.12683794537858936	0.2966889662615326	0.038381655016374014	0.2972544242250159	0.06624888943623644	0.502919287590924	0.04316055940967176	0.4991060669366932
45031	other	other	other	other	SUP35-missense_variant; YOR283W-missense_variant	other	0.12094114050469698	0.02862658790757805	0.020017155072926087	0.04423600019680017	0.04670613157061237	0.06450905108461158	0.09214392343043804	0.034885854096963015	0.06007540186414311	0.036131587066802286	0.1409107987097845	0.05936559992522129	0.09262585992680752	0.0374592556463033	0.16683298922205253	0.03690114460077695	0.08810607708899731	0.03652736821599869	0.0975553960547806	0.04730109959715825	0.2857016895653517	0.05457658985104352	0.1646940143955859	0.040675808378980084	0.09149839107395086	0.06346083204194047	0.02946437611230386	0.10087348946443588	0.06675956634204099	0.11885823246202727	0.023617658166466316	0.07418430518149062	0.028970499703036688	0.10153939787883806	0.012388139454992059	0.11923284140432235	-0.019578069595678458	0.04052442085893673	0.03779541586415065	0.06952343870566789	0.2418715410576001	0.06952227154582304	0.13304575774168986
45512	other	other	other	other	SCO2-synonymous_variant	other	0.07116786295855906	0.045460769191621404	0.08714100087490409	0.06890537742101491	-0.02932507761226947	0.13544699639765356	0.03906117450497426	0.050630518021069264	-0.0032447483753379057	0.0580445587730904	-0.02204386431855125	0.06196997742720156	-0.06252370820346755	0.040418381634073526	0.008833213644065838	0.03918611577843442	0.0163135683328828	0.058920605990615965	0.04078644609069793	0.06785657314158326	0.051620126152864015	0.0839002041115749	0.2018923423925898	0.0681374251957813	-0.06192225059283885	0.0921438625235078	-0.026780542321508616	0.2070922628317111	0.365339757416963	0.1794213945079003	0.1166518157719272	0.10170996664091699	0.10496199338925052	0.13752098615863464	0.1767288356583165	0.1266247640064655	0.002085958836773497	0.05403372531174655	0.005758998636295979	0.0866428738524166	0.1259132252060665	0.15704123329046835	0.08268729207721166
46200	NotSequenced	NotSequenced	NotSequenced	NotSequenced	NotSequenced	NotSequenced_adaptive	0.29255399012166344	0.07206427098456344	0.4802685095526973	0.12487411667559975	0.4896005360497477	0.18920942744001612	0.2965611283898383	0.08566280578849694	0.16307819791305206	0.09100198705788766	0.4714403876335926	0.05408344143294778	0.3292465849405632	0.03222134441942909	0.3848898770672941	0.032495562703354575	0.16829003856004213	0.10179717245974344	0.12022367159644623	0.12995398377751566	0.2037594339517452	0.12776048468390455	0.30304932831339004	0.10180779391518978	0.4863734443913798	0.10972309786537096	0.23435631502530124	0.3938661837394085	0.5554465063159296	0.2687546241454921	0.5958921640534239	0.14694644489624414	0.7703845976144055	0.11594181475410305	-0.052511633060191125	0.4102629697528553	0.33569891169140553	0.08153597166173783	0.3826093625437356	0.10150142032662407	0.4142550706515153	0.14034517596818627	0.5381281671907295
46313	Diploid	Diploid	Diploid	Diploid	None	Diploid	0.22757535880577345	0.02683498682085574	0.32058204604743984	0.038927438430896175	0.16737270982071858	0.059032582328018474	0.1991345757815685	0.03085390225043569	0.29385410387878563	0.03124833860510035	0.39920393514117103	0.05659454528418367	0.4591028579764379	0.03481763247644766	0.421842755330045	0.034076729208282384	0.14102270403120706	0.03221036055490161	0.16525099360724047	0.04312037486109993	0.6050452442539239	0.044640351094705114	0.3575308561345371	0.03388414852591735	0.44082195073122216	0.05688123432925591	0.27407443913805163	0.08266679923160224	0.4946898151392974	0.0766442809139624	0.4895050519077925	0.05267565982174232	0.690168037628151	0.07094551515930153	0.10737358059574308	0.1065638718676445	0.2878147834235552	0.034859760302754506	0.28256943479670626	0.061366691466016476	0.6426333298674751	0.04005653756445732	0.49986751952529207
46938	Diploid	Diploid	Diploid	Diploid	DNF3-missense_variant	Diploid	0.3197753177472633	0.026967578295689423	0.29839142691154114	0.03874331487864853	0.10819806680992096	0.0569838662019907	0.2615981311874517	0.02922459211980918	0.3435797832203503	0.03080645571708967	0.5763134751079638	0.05456096941971441	0.3320295113818361	0.032105726877307915	0.4806038923984809	0.03323279029127413	0.18262133704623731	0.030833414945675538	0.1256461149206139	0.04379414589769351	0.4604664205692791	0.04655921488550651	0.4043483025767016	0.034567852544667516	0.39079731054778016	0.05678199950601848	0.450860515793769	0.07092800764107864	0.5106968786574482	0.0728466802935896	0.528557474758895	0.04983471230192805	0.7057068331571087	0.06894877963122108	0.17057612446729484	0.10698043436201114	0.2611821652847099	0.03373643283675348	0.3234447481129	0.060791860278027736	0.5071400856583346	0.034921431211922656	0.5406278254856276
47877	Diploid	Diploid	Diploid	Diploid	None	Diploid	0.2404707162920721	0.03382986833980069	0.3973184615300851	0.049909625036825216	0.23926923275328585	0.08248015306907351	0.2078378743857048	0.0385630295080792	0.38606135214320253	0.03865235195243572	0.4211028436641544	0.0560900381127745	0.5133982088225396	0.03444494151506011	0.4101130876760015	0.033399158284526706	0.059763976388930336	0.043727923535260206	0.22484947686563514	0.054056469454869964	0.3645822598728031	0.05555893819322291	0.3867959594251151	0.043664897996415715	0.3953960093497308	0.06286217847150091	0.4509465849811271	0.11297061457009618	0.5882812247106513	0.10056407747790974	0.5538291085963674	0.056577266331031086	0.7066307773428167	0.07499198987108588	0.10863093257711563	0.11746027935718735	0.29572056603828306	0.04189679936336152	0.3581702887072637	0.06699118446776117	0.5373009003800788	0.047910710537176895	0.4962925229371858
48822	NotSequenced	NotSequenced	NotSequenced	NotSequenced	NotSequenced	NotSequenced_adaptive	0.428362191443724	0.023334043930217072	0.5752068255560749	0.02468745872164079	0.4497339372404282	0.04007132876928257	0.5505314666242518	0.025270210314993224	0.4921291731836814	0.028754429464093813	0.4581123980546071	0.054407625818369235	0.19696733427172736	0.03506714665153873	0.382539754795303	0.0326882053551617	0.5028861246448657	0.024826106064527276	0.27888233949488106	0.0366291822004853	0.4355213408378573	0.04495646779763928	0.5986519768337754	0.03075194951214653	0.31217291068680764	0.053859996487844085	0.5784528585401209	0.03859512279970593	1.1067341855992354	0.051065413999836384	0.9634227940185992	0.04518360565753901	1.4593085723584742	0.06669464440353945	0.11335564677456005	0.10245437303588692	0.1969215186598277	0.03420941466131267	0.28939199349291483	0.060622719595313526	0.2480806994141348	0.07192184110131697	-0.02494798496081466
48904	NotSequenced	NotSequenced	NotSequenced	NotSequenced	NotSequenced	NotSequenced_adaptive	0.20485176255988727	0.031751205380999604	0.2833702021999554	0.04785487026683072	0.23009482869281697	0.07728698009359976	0.20356488815080792	0.03740647945587417	0.3144151621923161	0.03714543589390977	0.3375587054759681	0.06179280298806454	0.4875087858829044	0.03974935506365426	0.4133091811673307	0.03627842010884644	0.19842677511854975	0.038393303112710685	0.09062359622396184	0.052716742332301836	0.37738107266535503	0.053183675245479914	0.4126630366081749	0.04159058280964531	0.3706875291881874	0.06235202283177235	0.6200223051803918	0.09919091767285493	0.3630130266991439	0.10710805347948996	0.4245277579240847	0.060865049986686785	0.8025810898452389	0.07332745898839764	0.03966921063474087	0.11826112785622425	0.1901172638442555	0.04026025214102935	0.1806432215325237	0.06749407362362941	0.4723734297814208	0.05029906312419728	0.4673269141584448
49174	other	other	other	other	nan-nan	other	0.01685341439877627	0.03227827151426373	-0.0615940950385774	0.054283334908784855	0.17818614512746453	0.07327294759087043	0.04840522112695973	0.039315603251476886	0.020693637195639884	0.043869144317712265	-0.03853875112034767	0.06835658212203855	-0.025573424606509812	0.045990176692828386	0.006145586296284447	0.041992186518662634	0.013509519442042246	0.04291073202805748	-0.01838362575667936	0.0543063181157154	0.07418484391420979	0.06852853664772457	0.125132704543338	0.04618790755585905	0.05163348749434093	0.06980956388121135	0.5580641709686475	0.1021537863365406	0.10678513679971036	0.13028641272929534	0.029875681596329414	0.07640102815598514	0.16330688450803804	0.10301606153088408	0.09743617594077368	0.12052336678735424	0.049385428744850926	0.043019406324446716	-0.03949565168978679	0.07407739650486328	0.165845206464009	0.09486309923478774	0.1487285025981012
50232	Diploid	Diploid	Diploid	Diploid	None	Diploid	0.24856164335392245	0.025780800046011475	0.22209011409554805	0.0357250348798443	0.1112163403191948	0.05622021442831867	0.26254426321013863	0.027955088231430763	0.2602580203377842	0.029844426723273764	0.4166871251094893	0.056822748735452004	0.4734556627999969	0.034759176173481364	0.5028136578892396	0.03404387780477672	0.19129788242966606	0.028740453261448463	0.22713692678361205	0.0395066016101108	0.5475967894218394	0.046414001662408375	0.3948506250251616	0.0336149053219615	0.34103765821099274	0.05593059790433663	0.3358993113283613	0.06943858321791588	0.3821812938023669	0.07273728086416124	0.5446418275272689	0.052317914247882034	0.7314329673436201	0.06956428385256945	-0.10090401595859172	0.11078414465774697	0.2720721017655817	0.03330979482456039	0.2629981604743543	0.06038635721188556	0.5503642729459362	0.034234621726207864	0.5451181858744828
50286	Diploid	Diploid	Diploid	Diploid	PDC2-missense_variant; FHN1-upstream_point_variant	Diploid	0.2929076657389966	0.0281864347874598	0.2839918279719606	0.04132473912324028	0.1450714960996947	0.06243129015077015	0.21738990846947068	0.03234020728012062	0.2713771468653129	0.0328127290010254	0.4436042171867706	0.055280752067269484	0.4816317698397261	0.03350576924614362	0.4450268736298403	0.03284592950304365	0.15334907434219616	0.03432467888912035	0.056485800211241485	0.04734562933161965	0.4925920105919266	0.047089554560204736	0.4100161913624738	0.03619671135281826	0.4077766521457349	0.057944148114682084	0.5110220942676988	0.08479597558167802	0.5530174366139129	0.08021071112327012	0.5631881153101485	0.052688556726290685	0.7055118014223339	0.07214715070506904	0.01679691284474157	0.10842374244628374	0.2571309874505471	0.03566576469133726	0.2726897912444553	0.062253939193959676	0.5056599570787915	0.04235498597786893	0.5629746581477992
50878	Diploid	Diploid	Diploid	Diploid	None	Diploid	0.2093862171138745	0.031153172327192717	0.3837280431875951	0.044524049216166685	0.2395709021795092	0.06879967132514488	0.23718639983783665	0.0338831522832281	0.2868649788237409	0.035539794147085364	0.4401134396658987	0.05460396787694592	0.4020609902241307	0.032742279550072084	0.4254406224363469	0.03293940848652236	0.2468481843641597	0.03618305048062327	0.17156887893497816	0.04993020288527801	0.46201207605274	0.050371499734365686	0.3168050274229849	0.03963522525147725	0.37799357888997664	0.059574026030390824	0.3800656165290587	0.10711898019852764	0.4492743254421389	0.09740352185024584	0.4224488262953989	0.05788587419307136	0.5721023050467577	0.0739908298434084	0.0916516584761534	0.11311419572180395	0.25203491381222604	0.0372478132669963	0.2918480886996757	0.06358808494155099	0.5164863888960961	0.04781395918423576	0.5626581290635341
50880	NotSequenced	NotSequenced	NotSequenced	NotSequenced	NotSequenced	NotSequenced_adaptive	0.2401338704265686	0.02650388111065298	0.36985788517022616	0.0356113519563917	0.1616333947777672	0.06003301518310605	0.2146611219753652	0.0296237825676532	0.3163601665449016	0.030669690128743668	0.4577866921382751	0.05500331766603876	0.4311931347638979	0.033225644807567414	0.42264428679177213	0.03298528976890807	0.17388946478781886	0.03074759798983482	0.14762208313766145	0.0414545997511959	0.42779146444419497	0.04477904662379727	0.3810554928877265	0.033622975269022616	0.36338389202723537	0.056820804616397325	0.2028766033912094	0.08138728489102222	0.4907326908636535	0.07813043764039825	0.4876509175871198	0.0519168486421176	0.8460703181772765	0.06910218140367709	0.20118214449596725	0.10717984311409187	0.2934018195268477	0.03400789686863832	0.2532502020284609	0.0612883031187276	0.5508152015719531	0.036286880762931024	0.5196787348512073
51200	Diploid	Diploid	Diploid	Diploid	None	Diploid	0.1895284864486135	0.026221624898460458	0.3590075411700549	0.03563901862366855	0.1338864601732695	0.059867372499366085	0.2225117207861345	0.028530016476565438	0.2762860329971731	0.030210731720471475	0.3934205638610002	0.055270368996046114	0.5079964513323183	0.03346602191400958	0.4373191563118986	0.03298636702893984	0.15811667045979144	0.02918263458946375	0.1173059334086499	0.03995884920932559	0.4636894340057406	0.04375928364266548	0.3651554830863905	0.033137525958710966	0.38096105326251256	0.056259650119205314	0.3609488232008307	0.07310696647855339	0.4058133432336141	0.07878286025969057	0.4218585179071239	0.052996153714948896	0.6432844598829704	0.07099142220930636	0.03208518493289216	0.10789859506026768	0.2067740096437837	0.03397163260519345	0.2334266410769275	0.06052309554274735	0.3952299901530677	0.043275922880109625	0.5289793643697918
52221	Diploid	Diploid	Diploid	Diploid	VMA6-upstream_point_variant; DSD1-missense_variant	Diploid	0.18182819050815574	0.0303101192304722	0.3810193099256776	0.042989638510437016	0.1307357888770058	0.07342249683578836	0.14167349580803004	0.03368593435273117	0.2735492591856746	0.03357410687823787	0.3795938826255576	0.05848313782466678	0.5331969678936267	0.036793476229458284	0.3805406276113228	0.03481966529135905	0.04081124645661585	0.03600896955796886	0.0827404709031714	0.04733653738600798	0.4103163291919017	0.048480812413696284	0.3267521312981239	0.037194630021461714	0.4545771075017319	0.058145365527220085	0.3761966701342471	0.10380485319493417	0.3618512425695504	0.09841758854216004	0.4509769516537136	0.05722957854307802	0.6835054464791825	0.07259020919688675	0.00151982412972911	0.11391601484303733	0.30901070128066044	0.03880336309637658	0.2529054931823165	0.06493680305745601	0.5221932203696021	0.04087863885074484	0.5274945268851343
52560	Diploid	Diploid	Diploid	Diploid	DTD1-upstream_point_variant	Diploid	0.20474588312188732	0.032813755221073534	0.4000365124806462	0.04423005302873079	0.030154941037995143	0.0794080579473895	0.1839248627318218	0.03616753148298858	0.242176095208698	0.038371572420116205	0.4104784372326119	0.055019240141535565	0.4645198794548391	0.03353586717548972	0.394988038325152	0.032853018985512496	0.16439930808784214	0.03900173346480632	0.08329990850403457	0.052875726417181	0.4371832865090337	0.05099301143339846	0.31810954517365303	0.04088429503508632	0.32660034088463896	0.06281820515984339	0.31678061646412203	0.10902383319377923	0.3022761121658027	0.10170096444131964	0.5167210145139189	0.05494454978239503	0.7242502598504029	0.07477844247753669	0.16821002314578035	0.1103765262048869	0.26369524834813524	0.038776275527453406	0.2345921568996157	0.06540697504197512	0.5132420566094992	0.050364685057421615	0.495281398816005
53054	other	other	other	other	ATG17-upstream_point_variant	other	-0.03808300888047293	0.041886011423974016	0.38423816878122624	0.04890887585718952	0.44461710778869856	0.06348432984116399	0.029070686986869168	0.052455866747306	-0.008859885704543224	0.05718276892817579	-0.1312358025591627	0.06948395533438509	-0.21792384496259554	0.04957330730193577	-0.1995551014461798	0.04461102511436167	0.3045614791417702	0.04895435476844907	-0.0022763023960459873	0.06407651177311285	-0.10489878350156354	0.0928170194632996	0.04950205952499579	0.06690657972831268	0.2836136920056576	0.0735247496450198	0.5043591574773354	0.11169239968197753	-0.04571547017980625	0.19699353013317414	-0.1693513975888417	0.11786749018078607	0.2337605090385154	0.12068649583879207	-0.2696777708707586	0.19930128342777195	-0.090976196343116	0.06178657451614936	-0.07242607059650343	0.0907159908596131	0.0917067169119875	0.13899463597210968	-0.08979455079468279
53230	NotSequenced	NotSequenced	NotSequenced	NotSequenced	NotSequenced	NotSequenced_adaptive	0.18434912314693405	0.04702482579648008	0.28045148594753905	0.07115813224766676	0.2053304875087588	0.11246289122484597	0.20612124188147093	0.0525717716384122	0.2344639717762003	0.048278067625857235	0.2902009117876317	0.057931528079548135	0.6332458854553178	0.03640879547640154	0.4643548846063661	0.033753828912824	0.21179279933645656	0.05550743289689219	0.20315338551326265	0.07512996950856551	0.4119701160674146	0.07514913862415147	0.461311622144673	0.056551835485766526	0.3893419609867168	0.07280107149441566	0.3638976140477768	0.16966660217894408	0.39346664498546796	0.13032953304616093	0.5571003412732222	0.08935074095444408	0.6693160963284874	0.08415834106820247	0.07258840094893987	0.13802425772325674	0.26883655686532826	0.05368533305801602	0.2636045873151241	0.08359494839850623	0.4801025209447426	0.0896771895967865	0.4535633104100816
54461	other	other	other	other	YAP1802-upstream_point_variant; FIR1-missense_variant	other	-0.01942099273935309	0.0369980538763981	-0.02341697320393208	0.058107869588085614	-0.11753207610816463	0.10895859664656732	-0.05513865775401209	0.04507107888539539	0.02415292270875044	0.047796979925637216	-0.020638841960306745	0.06459618313166789	-0.0371438848461726	0.04255585204462487	-0.03797288266338399	0.04052068813977193	-0.04188739847599973	0.0478116575714187	0.04517777350075579	0.05839770389754793	0.15147888495777564	0.07358275047417656	-0.0008245718527746258	0.05435788391201765	-0.004920870491867455	0.07929270219131095	0.375112604697232	0.14577124882653972	0.24949547921642204	0.1369938608094362	0.14979470381832194	0.07766995305839698	0.2750465835549035	0.10040960881750267	0.185600030640768	0.12247359565970033	-0.06850084162298947	0.047866740508181176	0.08999689094955979	0.07523297531532858	0.2234703807533357	0.10190194430521092	0.1417326689865688
55340	Diploid	Diploid	Diploid	Diploid	None	Diploid	0.3013370525379017	0.027194603505504258	0.28743560780830224	0.03917986914349225	0.1609434728477101	0.061617968406379814	0.27473858007683644	0.030043585805526088	0.2953399054166733	0.03138198755295702	0.5403642045827385	0.05386849389980354	0.367506221297925	0.03172647874973529	0.4681066504162144	0.032632416587743136	0.14076963081588248	0.031746195352265395	0.13937151293137798	0.04474682106895151	0.4156884997725005	0.04610625006383277	0.3896487801910109	0.03450268311334853	0.42449259806770506	0.056742711063620034	0.3532553743280164	0.08351661196335329	0.4582127724303585	0.08134886976064172	0.5021049753621296	0.052249299103324084	0.6630881155033076	0.07103444357292016	0.11328789740796792	0.10883690826027922	0.2429492233209436	0.03419383012633244	0.3003307659695171	0.06097378297998999	0.5028413993066642	0.03289426517055514	0.5855005274766601
55577	Diploid	Diploid	Diploid	Diploid	None	Diploid	0.2296805181038684	0.03132307574777953	0.34205522248798065	0.045601426689859975	0.1957111592469612	0.07087908045598985	0.22123449621313054	0.035123736443223016	0.3274259542127486	0.03541804575595179	0.39937097621289136	0.05531732858487958	0.4845715459033604	0.033821961848753884	0.413818659919897	0.03286406972786274	0.2214232215891236	0.036270913979517067	0.2284536270293013	0.04991390048400182	0.37888134845708704	0.053687154196895584	0.3915204547204774	0.038792074676628416	0.40178263145117216	0.06221138858965064	0.2492464519003701	0.10388963872487082	0.4498452813793814	0.09954301449380884	0.5222655712604947	0.05731166439181633	0.6550484146495926	0.07485828044628673	0.10125108836694326	0.11104658178968707	0.2939894276313168	0.039379862956006616	0.28240483746394784	0.06523918211415841	0.5219068685078884	0.0490937495584701	0.4826969195021716
55847	Diploid	Diploid	Diploid	Diploid	None	Diploid	0.3295273688091612	0.036403033129356506	0.34308471191106804	0.058036578583334025	0.3098110669930236	0.09271813363022614	0.3352074407080369	0.04120300895212317	0.3034915147202378	0.043858782100120335	0.5164435464894491	0.05592534971090832	0.33160713100011524	0.03358919188758667	0.4163070653599128	0.03406282846457135	0.17041565785405466	0.04676303400875485	0.127418351611729	0.06517564028593087	0.4651453935918399	0.05962149775078696	0.3975218106835259	0.04632130617609342	0.2596259839383045	0.06908430108328867	0.10036579281131804	0.13124105877020292	0.3965216346440743	0.13271648694534036	0.5330467210487279	0.0605347377745518	0.8431518033308748	0.07408409168349761	0.19519600607363544	0.12577323827393186	0.27454256040689834	0.04220743293312463	0.3690201312142985	0.06920590684503884	0.43245251355322495	0.056235928165811015	0.4770260723525874
57117	IRA1	stop_gained	Haploid	PKA	None	IRA1_nonsense	1.120374698280867	0.01815076009765572	1.1163259934407277	0.021408358869543592	1.1018206970281392	0.032085325137784525	1.161295130187832	0.01994976710739197	1.0473930345466396	0.02398524024150888	1.0017131739215703	0.051867165445402666	0.8604341293547471	0.029066806395985974	1.0226459494991549	0.030834113029591	1.2656116204358758	0.01949403574568621	0.9740039070285024	0.02679188869356551	0.4629719015546722	0.03349609124136919	1.3106292643952808	0.025915715656631196	0.8830964697667271	0.05101555334680285	0.8830554918762747	0.026150142851270847	0.07349406930132954	0.05114959888043245	-0.5253710069040628	0.0609733203934059	-0.9494457169938978	0.10204951733080607	-0.7632919978240336	0.1814374588629097	0.9002645559574588	0.02846868395683952	0.9665133469275708	0.05594817058658206	0.9139208530821518	0.024731462067506416	0.8706154526784774
57408	Diploid	Diploid	Diploid	Diploid	None	Diploid	0.2359006322890072	0.030208899671815267	0.2285946878465145	0.046346513005709813	0.1915520826336782	0.07324055468217368	0.23999894154694704	0.034342230299309176	0.2784898493826248	0.0343073889669172	0.4370603554256545	0.055848007055933326	0.4410018523657004	0.0343295986705878	0.459256038757433	0.03364057136658532	0.07470573228962216	0.0368818262577185	0.1944025941818517	0.0474292138387378	0.2908789328259865	0.053716944256415815	0.3272434290441845	0.0375797738181524	0.4592864887074006	0.05926271688910785	0.18790054587021515	0.10227477013727684	0.3315838119451653	0.09759148208328676	0.4280143655563049	0.05857054639169008	0.658955329742439	0.07326153207141119	0.10028099582490198	0.11025744635415467	0.3020598685916042	0.03745077440733292	0.22963789363060394	0.06506281673484593	0.5326628642598439	0.04637650159019468	0.5224962008663884
58107	other	other	other	other	nan-nan	other	-0.02669692106227013	0.03384086555115387	-0.1031328805741005	0.048823251590419836	-0.0025816563428297827	0.08231715358750655	-0.022615544972054296	0.03820359016356063	-0.06185253684147887	0.04186367108697808	-0.06087022169677345	0.06317442439191302	0.02065536497387031	0.04128044184587405	0.02251747006475315	0.03899165396650514	-0.05093830729264593	0.04122256929094507	-0.02144297050634397	0.05032024597421678	-0.040199298316889585	0.0650896672154225	0.01845431982066293	0.050032758478909464	0.05559996155262275	0.07066850304899445	0.05312608405868887	0.1241917077900398	0.1458058539651285	0.13981283070483808	0.20107202504672764	0.06953510584739214	-0.11818930704874665	0.10692355069599516	0.01867672561078184	0.1193290962153622	-0.008728374519928613	0.04176319131092709	-0.1211647294791623	0.07191241436084166	0.030225403830039143	0.08827267134904336	0.1287722681587309
58189	Diploid	Diploid	Diploid	Diploid	None	Diploid	0.2633018083636844	0.026760260883825833	0.3784158632974586	0.03898515794302977	0.26918509883097136	0.059187347730397286	0.2366281167027313	0.03074335120326285	0.3116565764384239	0.031843527761963385	0.4831149615256507	0.05386009941310725	0.4012373534293578	0.03180711940024997	0.4469512772109028	0.03243542974218326	0.2250586739479136	0.03247775437976786	0.10891375528194018	0.04655367843548283	0.3351895666672933	0.049859650271406236	0.3725774895633924	0.035555626583385735	0.4115447793585216	0.05735705600919285	0.4653454934488096	0.0743565308712285	0.4043533222228841	0.08413357568988898	0.4890253792006208	0.05204442302423963	0.7621917118566972	0.06989995175668233	0.16760811959994662	0.10884828455123756	0.24602487296328399	0.035160751408626824	0.31246705158509713	0.0617094254618327	0.6281748998778508	0.040309899212271814	0.5191010624336176
58400	Diploid	Diploid	Diploid	Diploid	NFI1-synonymous_variant	Diploid	0.2686129072572659	0.029715704254223388	0.2798949943346541	0.04259461186159949	0.11724135138532607	0.06836666794749131	0.20856074189684087	0.03183636550196453	0.26429278751632723	0.032659173386616974	0.4537696099336354	0.0554540670863654	0.3972740559866412	0.03365799603537868	0.477423193448337	0.033372322134057136	0.09266876399331256	0.035153565727559864	0.14958219358870234	0.04621339313040163	0.4883390024080809	0.047378117667214004	0.3540414158343437	0.03718593452428263	0.3507299577423298	0.05874448452443936	0.417416133824764	0.10496441405812212	0.5138942447216889	0.08365384510377208	0.4764531062506062	0.05473582696594642	0.7970552961722088	0.07118057834793011	0.2370529229888137	0.10721299772251527	0.2441817426265353	0.03535221841682664	0.31108734598275256	0.06228784143905757	0.507123030837257	0.044144892446265946	0.5493552518775319
59345	NotSequenced	NotSequenced	NotSequenced	NotSequenced	NotSequenced	NotSequenced_adaptive	0.2570969568089816	0.025623218059731126	0.3223206175632383	0.035578327176606486	0.12505481079133618	0.05434857696213974	0.2516005015643138	0.028062534038729582	0.30756119693584305	0.030166936222643482	0.5007771002297313	0.055634187314884974	0.3856914064167974	0.03365383991599615	0.4622823628889408	0.03358132806584381	0.15597851405364607	0.02933099766927356	0.11974088617372187	0.0409678605048292	0.4017126849250468	0.04464015200976432	0.35773030898948793	0.03364530896033745	0.3942834364492452	0.0557880512707678	0.321162459875566	0.07132854584010992	0.4462806445470908	0.07217363780443284	0.4723243392991556	0.052348271447219034	0.7442470567296775	0.07068861015921797	0.10179250322136743	0.10805174383645227	0.2575669120653503	0.03309363936558852	0.3461178431648745	0.0598234128863217	0.5001133372386299	0.03324795137266726	0.43466938048246895
59822	Diploid	Diploid	Diploid	Diploid	SNF2-synonymous_variant	Diploid	0.2676554899572198	0.02849976541476861	0.31508483678453675	0.04030964235339283	0.10767755571316727	0.06744862402139147	0.2321962280005209	0.03197255644652138	0.2550301409333346	0.03407207676841514	0.4811025349688353	0.057033677655343035	0.398919387013614	0.03499176147596291	0.42244776792760974	0.034810029358445994	0.1635632849700891	0.033228777645197924	0.1008511030139829	0.045789610677110966	0.4567827699060119	0.04809586959450607	0.3286420823387312	0.036029165856626084	0.34414505659905026	0.05876184969196386	0.33725264339199723	0.08788194034839147	0.5430941614366178	0.08023612894188398	0.478821112320588	0.05527825850442317	0.6677866304981113	0.07129379616566381	0.16382456123571196	0.11036205549712597	0.3100892741895231	0.03480888347470736	0.35762343140077696	0.06174481677887199	0.5371238321137249	0.0382538758189248	0.5287898066774476
59999	Diploid	Diploid	Diploid	Diploid	NAM9-upstream_point_variant; ERG1-missense_variant	Diploid	0.3045724565606305	0.024195736584641792	0.3944626811272925	0.031953383281413096	0.14007914722017847	0.051000760339477716	0.3219567124780693	0.02687786087017117	0.3412969029564892	0.028858880680993182	0.4526362549397037	0.05388134107854434	0.5180367990292807	0.031878998770986225	0.4985010505670215	0.031986025089166537	0.28090451310870673	0.02712542384523109	0.25232154858646777	0.03765974141797368	0.3731755827546955	0.042947608153041134	0.4029406268637824	0.03179747361965001	0.4514468466674729	0.054390028825267736	0.3024183611474163	0.05822422892860126	0.5127951023292299	0.06197248002446909	0.6662666971961166	0.04648138689751448	0.8762229001342092	0.06759304884237269	0.2422666922281613	0.1031570919196222	0.2966759081656242	0.03264772875384152	0.28038056596953403	0.05965076126528164	0.5759970125825384	0.030041677289460975	0.5544056940705597
60333	other	other	other	other	tQ,-upstream_indel_variant; YMR295C-upstream_point_variant	other	-0.0654038767733743	0.03695070053431005	-0.003926112241619783	0.0610241413698848	-0.11208000919394112	0.10148046300009346	-0.03237344823884439	0.04491998246271785	-0.05279848060072008	0.05164256913288398	0.050126300511705975	0.059890781974976735	-0.047014633961904126	0.03833900867494512	-0.021378277707991503	0.03750106944294642	0.036678073850273454	0.04995360438963339	0.015644444355556928	0.0578241410307831	-0.1096998040047734	0.08002334918301858	0.002595168201853732	0.05875797662026948	0.006538541046993468	0.08073578550038166	0.1068709362655278	0.15617924288841262	-0.06669090997849535	0.18983437986455007	-0.19934055115809526	0.09848191253584054	0.2387390580816647	0.10117551904794693	0.025399894608980803	0.12070687649002625	0.012579345990046136	0.04766070180176779	-0.04550510805309189	0.07713023132247282	0.2604405314168031	0.12399450166152735	0.17176841492441014
60549	other	other	other	other	nan-nan	other	-0.0250886166014037	0.032453870597608334	-0.05124170666695332	0.04911895929863565	0.00903986632607303	0.07320746561329608	0.036507577176144466	0.03721327135685668	-0.06752513610780947	0.041961652274081926	0.05201167301409363	0.060963637230844116	0.0011996860437950845	0.038980924908008134	-0.015332788291075362	0.03808386802207088	0.02109572720554532	0.03942315812124171	0.09387251855411936	0.04973456874556122	0.20605276070444264	0.060924472865185514	-0.08005301090564672	0.04922375725598084	-0.022701346070510827	0.07010396556190704	0.02761194661618559	0.1069189943339242	0.017888224544332226	0.1326067608211976	-0.0990861474806701	0.07720734219870512	0.16327233622761828	0.09216665385079297	-0.04509528835602813	0.1185430300543491	-0.021984502856182437	0.04141556607273029	0.027247269278989183	0.0691203430794071	0.1629904935936318	0.08781359576332366	0.0860559409585395
60700	other	other	other	other	SSK2-stop_gained	other_adaptive	0.7455646128216371	0.02348827651937735	0.4524987333156328	0.029383921437963187	0.6639808534044894	0.034943062118689916	0.7828504000055273	0.024378791286026727	0.6600407039152945	0.02861067039606516	0.7594352014067429	0.05132103844756237	0.5732031399735075	0.028581241759034013	0.6501095418915205	0.030752611539144988	0.8159573927738355	0.022076847797851733	0.7842302110498771	0.030832099790416068	0.46180589247158704	0.05556488686301364	0.7831545747974255	0.032371412555854955	-0.280786940852984	0.05913749900552929	1.0983529354419042	0.029658101791940013	1.259154498444952	0.049991513453029005	1.4870015737636304	0.04431349220331283	1.525459732572805	0.06656408583891905	0.06512962695722258	0.10268482537022088	0.3764281559420546	0.033248235454228635	0.5025358167868843	0.06029154578511413	1.0881963902550162	0.034405171037229766	0.9787338398640744
60959	Diploid	Diploid	Diploid	Diploid	None	Diploid	0.16359234379015888	0.025181627293033648	0.35618034872517457	0.033955888945730935	0.06303722602523686	0.055858477290673635	0.17685672795737872	0.027505949854722104	0.2589599030147034	0.029257624302024863	0.32478356903359645	0.053267803584128894	0.5449881361427661	0.03168066184961142	0.38107262917570456	0.03141382017474551	0.12770480143631227	0.028973539088177132	0.07182584400707605	0.03956932844435848	0.2443629541658525	0.045307108212626936	0.2977768808542869	0.03258751603617472	0.3643364595453766	0.055599815907096437	0.18280089227046412	0.07029708861400187	0.400883820429648	0.07243686800376478	0.4590311968781864	0.04966913311027465	0.7484700188665884	0.06962923699914088	0.04085199098231136	0.1060237347431772	0.2346031937642788	0.03366080316193852	0.1893762820890708	0.06048228160161465	0.455002500376337	0.03667354734914285	0.4824327635998527
60973	Diploid	Diploid	Diploid	Diploid	None	Diploid	0.2259718862277368	0.02787553902749705	0.195334164892488	0.03759420757726144	0.15628881885072854	0.05828617321334425	0.2013181295564766	0.030052353124481682	0.3484418971340557	0.030113043698423037	0.4152356529243895	0.06054592981855824	0.5326284183259311	0.038795920604651576	0.487643273085144	0.03641375864036234	0.14775386648790784	0.03035984274276702	0.16948106078443434	0.041470062370095435	0.4850882540916165	0.04570989148220303	0.3588386099284821	0.03405067849867624	0.3857492647083981	0.055990971424172926	0.21874227620918865	0.07919478159885883	0.35256177883977624	0.07732024398952664	0.5506184819292058	0.052369769813674236	0.6459387249726317	0.07054309993064478	-0.026157994414743733	0.10985979898796093	0.2532075920369196	0.03469643835540622	0.2893947408278083	0.06117927182446563	0.5629087731273211	0.03763122615622581	0.5154283115372904
61570	Diploid	Diploid	Diploid	Diploid	TRM13-upstream_point_variant	Diploid	0.22245307979199747	0.02561685665475983	0.37089155801069584	0.034060952298445225	0.1641382887004594	0.05397977317221055	0.2363045931869681	0.02770421076638124	0.2684192185786599	0.030005498626082962	0.4646347287986037	0.05611675559333836	0.42635113927720136	0.03414810577876308	0.4139562386056969	0.033881533358381434	0.1583217457386539	0.029085987877463026	0.1303112460382682	0.04058018323252557	0.4458804045365096	0.04347310286051958	0.34201150435164823	0.032931816592986995	0.4092167805520138	0.0557306472995728	0.2417013904520406	0.07088683319632832	0.43682325148570855	0.07306670765853733	0.4432388529520162	0.05081372174343778	0.6405946768062205	0.06987373225473463	0.09257921871185514	0.10592507190996477	0.25409838082709724	0.033062713269810064	0.2915608796478594	0.059826315838172224	0.4949185440349492	0.035998371665213795	0.5087868599480766
62701	Diploid	Diploid	Diploid	Diploid	ATH1-frameshift_variant; GIS1-upstream_indel_variant	Diploid	0.1854233206200416	0.03279363340364912	0.3862715523236111	0.04804801578358098	0.062425429388678434	0.08326249864266405	0.21604716391857068	0.03502660178565152	0.28093856406655937	0.036207617299628465	0.4285236746492781	0.056304556295811166	0.3981941834484232	0.034759398742541164	0.4211945451443656	0.033986791492497184	0.12144025173712812	0.03831642468868456	0.0948205674772133	0.0515352002844742	0.3717168866760305	0.05211953766070455	0.3760445604683518	0.0385854469490603	0.3893262545283046	0.061123193544036676	0.5845345442883267	0.1270907240257563	0.3573410740740909	0.11747373015254138	0.40975624717718173	0.06231694644533128	0.7107238465417707	0.07403674017104386	0.2419865139591087	0.11714359954122365	0.27578099251061505	0.038946916741701705	0.3015844111405058	0.06531618391137159	0.4241908915546361	0.05123712879987318	0.5070280622087464
63215	GPB2	stop_gained	Haploid	PKA	MET4-stop_gained	GPB2	0.8606891126183404	0.018460103305362092	0.7060374120335723	0.02195880182729497	0.7699321796736128	0.03229481051468134	0.8854503019572734	0.020268164371109215	0.8444445847028257	0.024159009598722508	0.8067132040511413	0.051387562760681495	0.7323937998709587	0.02875050312882725	0.7953803898166765	0.030462145467553863	0.8769093267345559	0.01972786181464248	0.691259759268256	0.027206612491529104	0.7643684544978707	0.0332267218734779	1.0193237998323548	0.026244202341259976	0.2835117234048355	0.051273162562373985	0.9732938965335935	0.026248133372935464	1.2913815654778762	0.0491503325572397	1.0770679728079302	0.04425907746439723	0.9444794712225186	0.06652108135685887	-0.674664691534384	0.10278979450414387	0.5902480131593982	0.02882879960315153	0.6899304297676082	0.05622600218474598	0.9610819939686992	0.021674381484170196	0.8986221009401584
63382	Diploid	Diploid	Diploid	Diploid	SKG6-missense_variant	Diploid	0.1985015314494876	0.028465106206579605	0.3656750540869057	0.03929352609391132	0.1629567388118511	0.06550962765345708	0.2286758353478496	0.031225089416905938	0.2822903844830637	0.03261976203567404	0.32828446933607136	0.05650884619927165	0.6623810819634206	0.03517274953231732	0.4254332773410808	0.03277213937744465	0.1828642423094382	0.033372843025032614	0.06670914326917701	0.0469000551382884	0.4684555505907164	0.04681448945619094	0.3896579771625833	0.035596146166693966	0.4085987768427648	0.058224657721811936	0.4024849430820234	0.08322291909420422	0.4380249971699913	0.08254879874271326	0.5262956961957801	0.05293574544739177	0.7681374892751591	0.07104179407936746	0.03969666496694329	0.10874659277523092	0.29172061328975485	0.0373771710586717	0.2135943986544128	0.06317084051706545	0.4188941604052112	0.05975736617426599	0.4379073310711588
64731	other	other	other	other	SEN1-missense_variant; tV,YKL068W-A-upstream_indel_variant	other	0.021317318833552062	0.02859288694768425	0.02229001364924557	0.040505649199009335	0.07959084554869761	0.06593177318756474	-0.03836213707406088	0.0338987782025927	-0.025389424278295263	0.036087664746623366	-0.030009640922039324	0.06544740148823278	-0.045688095409559	0.043240442314332286	-0.020922165361312715	0.04136835279946981	0.049393887354139215	0.034800067422626084	0.03752033473128703	0.044449385302570255	-0.023057873106698646	0.05571758425288542	-0.03621327629396349	0.04274089694802445	0.115169280983139	0.06311731078892355	0.1476960539465351	0.08736039049031456	-0.24018276778827025	0.12390780951715775	0.03079146679197064	0.06659917376653783	0.008842072953872224	0.0944851542392828	-0.0648753693020296	0.11242120522012752	-0.01992432590099986	0.03813749324917968	-0.0259210005159482	0.06567998663400892	0.11180600214986088	0.07174673087836725	0.15152370272475474
65196	Diploid	Diploid	Diploid	Diploid	GUT2-missense_variant; tE(UUC)C-upstream_indel_variant	Diploid	0.2707610689080478	0.02875128891511778	0.2333957609910164	0.04242939493953199	0.08501378973262176	0.06349045563003901	0.31410624850880225	0.031314947680011834	0.3396937778542756	0.0322699897812495	0.4182505263368364	0.056859620070290474	0.4363219930167163	0.03497121707200142	0.4619005873951007	0.034852243126955805	0.15531975207001775	0.03294101089512093	0.19741434845044945	0.04507029057624321	0.411771492280717	0.050497129026376514	0.40082608483970855	0.03595165577767002	0.35093110733409705	0.05774831891651917	0.14842626022335928	0.08913704964425519	0.2554910263344745	0.0830092771708635	0.4884129187345233	0.057584475911180474	0.5460035408892555	0.07378960162322007	0.07735648974965861	0.10980388922683004	0.28194285144736625	0.03512633250168442	0.2379894196480108	0.06257267400770265	0.4659817796553989	0.04219974761423788	0.4792943993831687
65266	Diploid	Diploid	Diploid	Diploid	MSH3-synonymous_variant	Diploid	0.2609811837598618	0.028505885041383936	0.3746569041318004	0.04165903340959657	0.10161819854136292	0.06681560320615611	0.2428758439265928	0.0329817164047303	0.2916696928967685	0.033382145991168816	0.4528042648735565	0.05706402327203024	0.3662727976679641	0.034839293018828564	0.3773591690619399	0.034750032888245734	0.18383821249696916	0.03586763643557355	0.1572771893624747	0.04901650135822203	0.3152576648260555	0.05024628988024226	0.3655081142820146	0.037164531128149415	0.4060215137386933	0.058312867005717535	0.32664907052788195	0.08780972177803774	0.3770685508241281	0.09005672019529985	0.3937067066519679	0.055596407801548176	0.6136073316152542	0.07308001768856466	0.0333392356866851	0.11191907066937544	0.2771385202518104	0.03558402519388395	0.2813702068804312	0.06237985051476312	0.5093884596816893	0.043345143155525206	0.5543476339104898
65692	Diploid	Diploid	Diploid	Diploid	None	Diploid	0.25214990237541146	0.03209893078318245	0.28230096198109506	0.0470746426832056	0.13648310002135491	0.08127262797858288	0.2139193566109345	0.03565093649283349	0.2985179743918852	0.036061633550458966	0.3822344728525962	0.055541783658499634	0.4508346387442541	0.033755208481519174	0.4402683550540603	0.033339219995528344	0.07272849561861038	0.040469765303343036	0.15353479032922876	0.052063378661953964	0.4765969758562429	0.05178547542799074	0.4047222461439036	0.039670640178767785	0.4750049656753205	0.060333775690950366	0.0031510878898614843	0.1220877880130508	0.3127751756033066	0.10673779130080804	0.4435849984134514	0.062158031743339275	0.746117564252457	0.07387364728310364	0.3023986091179624	0.1140454245363344	0.2763255636572681	0.03919167745834893	0.2446897598086688	0.06639809284783789	0.4856874813001518	0.04948291008753557	0.4572981814267622
65819	IRA1	missense_variant	Haploid	PKA	None	IRA1_missense	0.6512489908962803	0.019356756666319853	0.667800513293432	0.02301943605526213	0.6503494534293872	0.03291629474958558	0.7255519283368548	0.02123704955804153	0.7413276881492455	0.02466894448878037	0.5880034592236482	0.051826014060202936	0.7386504791334837	0.02959552331080588	0.7018053193776763	0.030546222381774943	0.7250558148145908	0.020489267412450198	0.5911158158002456	0.02855551374062917	0.6719134996054155	0.03528074871270208	0.8595429051097347	0.02697869960729229	0.351558806948136	0.051516919061230584	0.8534990674870043	0.027328016569366655	1.0490938332713802	0.04941877982831425	0.9039625853911412	0.04454862755566923	0.930783785919646	0.06667361247141322	-0.43543633575549306	0.10527111591890187	0.5072011255700863	0.030002891025110882	0.4948684868019833	0.05719934030099901	0.7817690642259645	0.0286231548503509	0.7130955298801125
67711	Diploid	Diploid	Diploid	Diploid	None	Diploid	0.24641778054429025	0.0257342245921566	0.3552213389205109	0.03669814021910989	0.15171189592848025	0.05907329474293195	0.16954914216512934	0.030431754480467633	0.2310126498992129	0.031628795056102235	0.4465304541373316	0.0543673270744928	0.3720136229196777	0.032548452662369484	0.3942926392712613	0.032604288352847975	0.16499840107341168	0.03175025509378205	0.12193092706460072	0.04290584851011937	0.4059167143115208	0.04489761237091753	0.33288249809991016	0.03429501436107548	0.39446586368794295	0.056632394789373826	0.33613728095084633	0.07542732442305382	0.4797702779630349	0.07600891949468648	0.5172975432580704	0.05194356706680536	0.6357349941418625	0.07180520239207681	0.1715528455049086	0.10667985591483926	0.2487427627485135	0.03418887953482092	0.31203096179330475	0.060729826774949626	0.4880207060095007	0.041258184896127814	0.4950555681162917
68197	Diploid	Diploid	Diploid	Diploid	PRP5-upstream_point_variant	Diploid	0.3042199843463627	0.039199547072955435	0.3193055400947627	0.05856244321213139	0.1961321178175064	0.11626295113321708	0.1678425441719799	0.04634843571819345	0.3412229175917999	0.039549929063444914	0.4898022189069017	0.057818112543744776	0.4403887533755847	0.03679879856627265	0.3845194234747429	0.03547847309733932	0.053887823971837764	0.051805853161713225	0.09578063940695447	0.057724576136407524	0.2937966441097575	0.057622376616627766	0.34459513684496723	0.045583684004649454	0.5255329201120728	0.061566978512166866	0.25377499445716656	0.1451755246786963	0.6147881774774563	0.14921543715634045	0.572020783181919	0.06304898236712822	0.661085351433913	0.07694767307933204	-0.008784006442770862	0.11731529186820072	0.10464625859288257	0.049665608796457435	0.11106001758949197	0.07638007439685207	0.4812283429774839	0.046449362701179865	0.5034976317095953
69575	Diploid	Diploid	Diploid	Diploid	None	Diploid	0.2640742450687926	0.02237627894544856	0.3519229154719276	0.029408480730064163	0.15769095660619148	0.045924996777176576	0.200236125772618	0.025084127122758686	0.30291248077812943	0.027399311224518774	0.47962650259169104	0.05309191727613294	0.3584871701645032	0.031069027768507826	0.40886030699188697	0.03179664557838406	0.16325205372156454	0.025321526681617856	0.12802658518598573	0.035184670651697836	0.4421069793450301	0.03939672415621754	0.36363242510912935	0.030007309129723693	0.3946458262391968	0.05345186791560736	0.23765542937994755	0.05672908322381976	0.4820181551763331	0.062398722548517686	0.7644331427260361	0.04638474243640685	1.2038589607794572	0.06706205050688324	0.3799657325722832	0.1026943769752304	0.256952116393529	0.030948918361308024	0.3156334268238417	0.0580112600716013	0.4973962297837296	0.028360731278089538	0.5042463927090711
69928	NotSequenced	NotSequenced	NotSequenced	NotSequenced	NotSequenced	NotSequenced_adaptive	0.202083418127414	0.031519332300111245	0.2281393205974989	0.04231393249892424	0.18824389484119333	0.07624831891311826	0.14245699417871696	0.03491118692650418	0.3468651914122345	0.03323140720676385	0.5564640351850102	0.058691256335891125	0.43113605891694057	0.0366391883445714	0.3968748190981726	0.03630079091108685	0.0855313191171452	0.03622350011926038	0.07961388307633753	0.045567679766400165	0.43389253848478493	0.05148107577860224	0.2744337164012623	0.03816222740297997	0.4196286664531493	0.05724475941446482	0.5433314738992127	0.09431464665552736	0.3895784514528642	0.09541430528223767	0.4734002110120214	0.060888035680451535	0.6157696381846597	0.07389447091975296	-0.034330358480502615	0.11081252098642064	0.29165000313455697	0.037336430283416135	0.2466031477691284	0.0635998967584121	0.5044772836884523	0.035240866768095507	0.5083591842554883
70033	other	other	other	other	RPR1-non_coding_transcript_exon_variant,non_coding_transcript_variant	other	-0.02864807601909465	0.03150875052325443	0.06813246167257603	0.048089709750727835	0.035164759737516635	0.08324427632569155	0.01965543856462192	0.03951219949800217	0.08028763194485371	0.040596792318070014	0.07255327618194825	0.06059246903288217	0.07599435894017756	0.03852201376416478	0.02007298795510235	0.0377901878251074	0.046303207728860235	0.041737432797948684	-0.0319531613321896	0.05197450477881322	-0.015652706209486292	0.06083630788617801	0.012554135758530894	0.045198940467723187	0.014613143094721781	0.0701837998438529	0.12306804590575796	0.12033839615670675	0.11193093758365427	0.14219028213255247	0.07417526899809347	0.07089040690985123	0.01878881766866895	0.10440650344767306	-0.19769252580717955	0.123979630662087	0.04475613382193986	0.043044279010585385	0.08691274649843955	0.06972802442545535	0.25337439786322363	0.08643113436086003	0.02243387325264813
70408	other	other	other	other	VRG4-upstream_indel_variant; FIT1-frameshift_variant	other	0.06325768575066693	0.04010380837940719	-0.0836721516275147	0.06579518848007437	-0.06681208180540292	0.1169376685070418	0.043931746090412	0.04791738737778572	0.016699074402663376	0.05440027664959952	0.04613582739036813	0.06652372478090122	-0.062291790448075826	0.044893583807792174	0.04474523512487941	0.042226395092298516	0.14064513574724488	0.04913890073289318	0.038745533187862884	0.06484224731518116	-0.01241856263582941	0.08895609228759402	0.06103896024957424	0.057557841591745325	0.0012411536873338349	0.08268841884174748	-0.12774650074787114	0.18913920863779424	0.3739818105923923	0.16700492006893286	0.03975080552781728	0.10799168207268238	-0.012758751727540587	0.117960795119295	-0.06057201927456509	0.14116554126881864	0.044646974786734274	0.04949315128291608	-0.009005356057998341	0.08369710978416157	0.19094390373893888	0.12182011053421582	0.18650619023798484
70433	PDE2	frameshift_variant	Haploid	PKA	tE(UUC)C-upstream_indel_variant; YIL071W-A-missense_variant; APM2-upstream_indel_variant	PDE2	0.7447344221971607	0.018980423459736898	0.836053290658807	0.022139289368375444	0.6692071263508879	0.032690536411620105	0.7648092076984792	0.020732992364125215	0.773847206754836	0.02438862400076945	0.6672292464374986	0.05242410090078473	0.6236876489607694	0.03018742003152582	0.7275583119256214	0.031157765428920337	0.7563747944609398	0.02032439436975167	0.5599916983358436	0.028611748992032175	0.6220212954586929	0.035170862870349415	0.8939862440550094	0.026652897568419383	0.6657304695551178	0.051121147477077133	0.9006087300186726	0.027060746902683785	1.2053555826990745	0.04929886122657857	1.0372190984590648	0.044357437480598234	1.0498287443104408	0.0666082086692003	-0.3294209720477239	0.10201124679432642	0.5543213244336171	0.029417645308091725	0.6132982482560564	0.05681605547062011	0.6926658667666082	0.025032184245952945	0.7269943283173138
70812	Diploid	Diploid	Diploid	Diploid	PSY3-upstream_indel_variant; YLR345W-stop_gained	Diploid	0.2952163639497853	0.02514630853617385	0.4442992223980696	0.037677102155092214	0.2430831993611844	0.052599714946803496	0.2739310161095649	0.026901662212708642	0.4763559390409598	0.027272778566719443	0.4733084528346606	0.052521905918654466	0.7707640795274341	0.031155887340704243	0.5625207162935045	0.030805339810597836	0.2696889486800407	0.027444255061393683	0.18316237784956715	0.036602212808006136	0.7451419119629139	0.03752970780855596	0.5338752487143673	0.0300186926537733	0.4045290730297117	0.05581255403838117	0.3070376772591041	0.061620763004418364	0.5178080109303966	0.06772842331296074	0.5869949225336015	0.04855726277866082	1.0154449590200858	0.06778472671366023	0.2795277646719416	0.10425394136583732	0.4244608695037834	0.03538062426855155	0.3711589071896888	0.06184080979735266	0.6162032642585489	0.03336154968100643	0.6476834534823795
70982	Diploid	Diploid	Diploid	Diploid	UBP5-upstream_point_variant; SCL1-missense_variant	Diploid	0.2377266930340931	0.0256121663996621	0.3820836656384029	0.03498097559010703	0.1939799437624836	0.05717089973115719	0.22037200753783376	0.028803454567362462	0.2903977048180414	0.030336448351860727	0.4321728252931281	0.054187463466101565	0.4223900338518384	0.03218192050459559	0.41244097901841853	0.03237872097288845	0.17669195467009194	0.029621355851117737	0.06675401659108375	0.041670931556817364	0.43537920961569104	0.04405356676623096	0.33882020449718675	0.033151529209020585	0.3777661236144193	0.05640477294287921	0.10222435369586576	0.08289024699168906	0.4015789190181098	0.07758488597413211	0.5604418262431308	0.05026935914549467	0.6308150960050152	0.0704648311269357	-0.06449998732029058	0.10952623113327327	0.2854773457702095	0.033939011002898194	0.278166652555175	0.06071685804513994	0.5428616507001597	0.040525596330275485	0.4771178448842575
71109	Diploid + Chr11Amp	Diploid + Chr11Amp	Diploid	Adaptive Diploid	None	Diploid + Chr11Amp	0.3703493700858332	0.02517303857886029	0.55515585838385	0.025488904142740985	0.4284677293612661	0.041625694688905035	0.5331871493461338	0.026286390851964228	0.5061897039856863	0.02964703626536471	0.3561552117849768	0.05745758566136435	0.2914749873972624	0.039664360014171465	0.363446331351205	0.033821920602586805	0.5051835919813366	0.02549358545916641	0.3291728891960489	0.03694829596631185	0.5667963402307775	0.04354013012190934	0.6290239540913574	0.03192629606952232	0.2842018337944729	0.054615686660478335	0.7227439684234492	0.0396484275284108	1.1541632436970253	0.05129435268527911	1.000980446735874	0.0451234670736862	1.5101465101532785	0.06671953709830095	0.06590703706109535	0.1028017326293816	0.2412294301691786	0.0355445264000166	0.215277172264233	0.06295729589389823	0.2960358311729803	0.08017221029854378	0.06357563234136945
71696	Diploid	Diploid	Diploid	Diploid	MGM101-missense_variant	Diploid	0.2948470169513942	0.037030815307936095	0.3860946661800495	0.050390414326535606	0.2079925098062141	0.09172257122335133	0.172045388377593	0.040973352597819215	0.29436970604460005	0.0414200371799835	0.4674156537276242	0.057329163310684626	0.4751437061301141	0.035360513541804285	0.4267555194867888	0.034750619377945886	0.1597838456015654	0.04653508128900013	0.13470432479224867	0.05990447069183592	0.4291149786681713	0.05809543911593543	0.3495528005447882	0.04460524575462793	0.3742759742125519	0.06435211259923719	0.6434531857396311	0.12236849949528845	0.5900608646805601	0.10937767544192964	0.7750521194357922	0.056294344336247214	0.8241241926883672	0.07254378218912684	0.17072100549154334	0.11590819957461218	0.3273538777332364	0.04222280875171317	0.330081263545972	0.06941929052636912	0.5953443384186027	0.050727182830847435	0.6010128215977465
71751	Diploid + Chr11Amp	Diploid + Chr11Amp	Diploid	Adaptive Diploid	PMC1-missense_variant	Diploid + Chr11Amp	0.35883485213631755	0.022441562359816883	0.5283747022014675	0.023300095361570967	0.3568452716228608	0.03903939691048992	0.4917487262099343	0.023162253783256388	0.4286827455024269	0.026849659571150247	0.3496295577554407	0.057886108774316075	0.31693482795740696	0.04142857192504154	0.4004802298182873	0.033825857528917376	0.4611483440293124	0.02241986573247901	0.2695478079855541	0.03203986448962978	0.5797312323434387	0.03858077473970198	0.5609099881756152	0.028692120289402837	0.29028537489937417	0.05316272091798188	0.662148312435707	0.034891922683827334	1.013428448346865	0.05049646096439192	1.0217955258153042	0.044674392831449264	1.518512515194951	0.06659445998133665	0.052751090398019215	0.1015087165605806	0.20513453930829495	0.032758546312505035	0.17245322776395994	0.05958365524620289	0.19318833671411664	0.06763085406921131	0.0017287659535181845
72008	other	other	other	other	MIG3-frameshift_variant; SEC8-missense_variant	other	0.012896323385499677	0.05199272252825369	-0.05322390189791944	0.08597062511645442	0.2357585541730057	0.19240289152101345	-0.0562310784249501	0.06835807639990935	0.03348041626141378	0.07031216130880152	-0.020711581570536437	0.06713643598344171	0.13678062130895513	0.04602256953352929	0.018427056200362824	0.03983692482218097	0.004914416807538602	0.0700394124566339	0.04438994242309716	0.07788963572113973	0.07902510252855695	0.11102935620446328	0.011413160679008695	0.08728636017917939	0.01769904068203266	0.09669430510156478	0.5159219640003768	0.246977398408339	0.12447854326180408	0.2600117706878724	0.13253850575038315	0.10358897342011184	0.5358252912429643	0.11498409858980048	0.21472180605166155	0.15136107175332356	0.027323534481389543	0.08242389695748542	0.15392592046558015	0.10261666421174613	0.14562664932989794	0.1846630027824564	-0.04905595982920356
72395	other	other	other	other	HSP42-upstream_point_variant	other	0.001906405805610284	0.03996486797302886	0.02780798129998935	0.06134487741417284	-0.020296108667147844	0.11011177890352326	0.029356889509199614	0.045986448482856095	0.0027685863095403642	0.05007604624175815	0.1412118374651165	0.0596480099388555	-0.058830344044003426	0.037872002910212865	0.09843803135170874	0.0381039066968364	-0.003839309264045649	0.05190717230110708	-0.01748125390838768	0.0641966902867173	0.17477589606401053	0.07082736273386922	0.05655952126770439	0.058064356330340176	-0.04134731880832291	0.0825564772015682	-0.4485693400836224	0.21712567723282036	0.19524913455227644	0.15987810091188148	-0.010312318571218415	0.08854203393857546	0.07171290374968499	0.11454261635392082	0.08208279510895894	0.1274458594887245	0.03263151513896142	0.04741150814244385	0.0198583109104003	0.07693054377229593	-0.01153572497481259	0.0945964250704649	0.1683454891056091
72591	Diploid	Diploid	Diploid	Diploid	None	Diploid_adaptive	0.7582640276209142	0.02151562166847295	0.7470143451374363	0.025047274407533657	0.6267410556392461	0.03507546329067725	0.8293918654493709	0.02228889730028145	0.7939204348777731	0.025457167020643625	0.8860919287825285	0.051843021992685145	0.909736533305902	0.029321802725170633	0.9651248615045219	0.030524366484003636	0.6449752327695818	0.022322308915299623	0.5428335447704151	0.031869168994994285	1.0106448348886876	0.03573166669211291	1.0086086399463228	0.027832484530314658	0.5501169785916847	0.05187565245687393	0.9746346923477064	0.029102827421269305	1.2798296647800105	0.04971527146884895	1.4398242160614343	0.04432238719808456	1.6862651491999048	0.0665071456544824	0.04246050478482483	0.10297356813731127	0.5937299103366405	0.03052502726133393	0.5643351246005164	0.05802695003170106	0.9506377315052492	0.030044544418081926	0.8865614700592135
72939	NotSequenced	NotSequenced	NotSequenced	ExpNeutral	NotSequenced	ExpNeutral	-0.04857625929617799	0.032605357729502606	0.04750253702618695	0.04772498530625332	0.048307564591762185	0.08206138427786064	-0.07147546040584479	0.03977526989960828	0.004962777525471257	0.04246340946144542	-0.04479434616128215	0.06485714445472265	-0.018989521816289236	0.04329490407971753	-0.08685459175977632	0.0401567775100582	-0.0579397661435296	0.041519533322543024	-0.06152470758772941	0.052277864465427516	-0.01582904102098949	0.06723704803369207	-0.022997170772015414	0.0501796394984702	0.06013743546894099	0.06972385500142844	0.15500510243806645	0.1184417140730388	0.045795392077354134	0.1387673501249999	0.026775939968723014	0.07217745965565693	0.14185584589525296	0.0977152015626506	0.04930502465713455	0.1162720662069548	0.008213374770356609	0.04402037795992095	-0.027936020325748046	0.07110139098128515	0.14570510939714673	0.08593197930821936	-0.008560402126600714
73881	Diploid	Diploid	Diploid	Diploid	NUT2-upstream_indel_variant; HXT2-missense_variant; tE(UUC)C-upstream_indel_variant	Diploid	0.17445358404961667	0.0326123621184927	0.3760018724939194	0.0462686942786198	0.1612765004269602	0.07703513097983766	0.13112086094211484	0.03569280813850026	0.2275428136124281	0.03627765599314745	0.3435711244578603	0.05707454133095986	0.6137771503892322	0.035921761310253236	0.3837590072078491	0.0333669043882056	0.07680935133961855	0.03933399703337044	0.06282061353904553	0.05204516933110678	0.33544972851028954	0.050935314058730564	0.2565917272419983	0.03994743505836645	0.3947753443623757	0.059274029528028335	0.28563847796311964	0.10605064409845047	0.44939863455272255	0.10496163502275818	0.4399035513508855	0.058479054219120384	0.8897596181547044	0.07248552867782705	-0.029034990316527787	0.11294077428640738	0.3023129655147742	0.040504470527680005	0.2833392143642577	0.06695269917769613	0.49547293143445204	0.04960024117936082	0.4844342512204918
74033	Diploid	Diploid	Diploid	Diploid	TRM44-missense_variant; PSA1-upstream_point_variant	Diploid	0.2370986855483106	0.027492145702714015	0.3495159588368689	0.03912649416009868	0.0846295156664794	0.06465506179879839	0.12695035548346031	0.03099170166941421	0.2585869978678897	0.032150930391139754	0.426726235895366	0.05576496266115414	0.4423011511526749	0.03424871783020178	0.3989479406697162	0.03347070386678961	0.10768460301003388	0.031991548053301386	0.06052852038160603	0.04393848517075442	0.5018257448543976	0.0477391067670145	0.3561941800046321	0.035227718911705536	0.3603221441228434	0.05699618603943905	0.25948664223047463	0.08119614864289529	0.5932255593181395	0.07816209173911136	0.5473793715978666	0.05312973044187007	0.7898490675587204	0.06991845753478701	0.026856673560180084	0.10849290000971093	0.20314838089149215	0.03625682673933181	0.2964545538445095	0.06181019776487776	0.549941581560549	0.04192628435387795	0.5560552678120306
74280	other	other	other	other	YRO2-upstream_point_variant; MZM1-missense_variant; SUF1,-upstream_indel_variant	other	-0.1106053683197635	0.044478547396213486	0.04802778151748996	0.06360596827757795	0.04626391551911773	0.12455299472847285	-0.14221012363775098	0.05434910047973	0.006942002065414714	0.05431512399498003	-0.012628994676671687	0.07072425113836363	0.03311838269762184	0.04921568392866238	-0.04553403105823055	0.04389813382407145	-0.059278237186160175	0.05848318139025749	-0.09795569624434024	0.06738311619967573	0.15816153631670216	0.07961861998691343	-0.00893353107020854	0.06117226030048921	0.00782512399000245	0.08361352416717541	0.04482911635898349	0.2029783965475235	0.03183209706626749	0.213102713177904	-0.020795262078493998	0.09486063666311227	0.17306027737652496	0.1249762034409795	-0.2552577611427818	0.1398083783557947	0.02593258424704529	0.05781694098178183	-0.04654107972102002	0.0885302484284203	0.18036918528080803	0.09580707645733444	-0.16744531199725102
75144	Diploid	Diploid	Diploid	Diploid	SRB4-missense_variant	Diploid	0.23739456427579145	0.0279625100623418	0.3326407494191027	0.04130469352611272	0.0594349063135596	0.067281938862326	0.23136915162449606	0.03069855873013873	0.33493550666356875	0.032366893143512945	0.4991258389338452	0.05533718137942178	0.3455607848721374	0.03357752649676997	0.4675106054911258	0.03373225739937428	0.10291634518082383	0.032944654200959995	0.11376895531901456	0.044128712547282165	0.5216850843624823	0.04717423525392371	0.3608713382300046	0.03502578733474362	0.38946821180482144	0.05751174195066914	0.16488227758263466	0.09463790150714756	0.4680917001799986	0.0878466144585711	0.36608499330889066	0.05967143629321137	0.9345848945937189	0.07182362951117847	-0.3415200531230454	0.12571255564663994	0.30164591718656897	0.03464646550537444	0.3156526312358181	0.06120752138503398	0.5137546692146541	0.03898388414861565	0.5150594188445686
75669	GPB1	stop_gained	Haploid	PKA	None	GPB1	0.5036440715632001	0.029224962034264182	0.6326584352737467	0.03630971692038712	0.4195752408168099	0.05456828269217047	0.5470973845158559	0.03346692443846228	0.5429524042477769	0.03252183644486581	0.3864610911117047	0.05434562106118174	0.6062796105873111	0.032217295508807794	0.4766737559424717	0.03162732786792656	0.4452971424774915	0.034571026977404225	0.4609692392202802	0.04968091269522972	0.4846118585179801	0.055309854217112174	0.5742032204807042	0.03789581005810113	0.36705428726194506	0.059465491581691024	0.5390380290525685	0.06117950894703177	0.5687053993531624	0.06996650966706776	0.5186096209378593	0.05888572610386768	0.6017813583427939	0.07918289700904525	0.3334158272401589	0.11619557957639474	0.4727488787200224	0.04455293022298444	0.3837194062710994	0.06992309829354881	0.25107033508008125	0.09778773830022247	0.5165947923595338
75841	Diploid	Diploid	Diploid	Diploid	SCC2-missense_variant; YPK9-synonymous_variant; EFM3-missense_variant	Diploid	0.2104293007536892	0.027214952903900174	0.20654590485521748	0.03829992936906112	0.023250457853435262	0.0650939421641893	0.2869339558111081	0.029529266504291676	0.30454292986291803	0.030560543917024837	0.499457223652128	0.05711087154718629	0.26157180275475983	0.035192239656925355	0.4309916691674422	0.03556598777322947	0.14628676465124885	0.030487277100175618	0.13742768570684022	0.041740043867362936	0.3950846867316283	0.04670919911677419	0.38096448743130906	0.03483230246056775	0.4263668208106437	0.05619264230572273	0.2427085761233444	0.08549429099026366	0.3134221148815235	0.0816664743979299	0.3841235369853688	0.06077748688770336	0.5494506179989933	0.07377367162744285	0.04777935755563265	0.11199701012278597	0.2591681924222469	0.033474068259831895	0.2985186638295108	0.060794475386647014	0.3969123308999486	0.04149774688941218	0.3901234079053124
76616	Diploid	Diploid	Diploid	Diploid	None	Diploid	0.19616431126719727	0.023699859393527863	0.2829003001401202	0.031245404612877517	0.11608424327513005	0.05088145551787264	0.22077294975756576	0.02570994947693741	0.2563096521774392	0.027849837953175898	0.3993649307348765	0.053699463247573284	0.44766334146526426	0.03190986038892083	0.4348608195281791	0.03195846028293926	0.15147623591458825	0.02603378852744516	0.14974747327295485	0.035258063772775884	0.5013594266842925	0.040602810610952736	0.34597779002755163	0.03047981881770795	0.3799634337291247	0.054212817130308885	0.4286922413250437	0.059720469581449484	0.32139771498784564	0.06943432608478138	0.4683702253007348	0.04936770450951088	0.6100195155666395	0.06905312611057418	0.06166212812041096	0.104320888968283	0.21794486517208111	0.03223177532071818	0.20837044279283248	0.05906982820516786	0.5177339394567829	0.03547744342523823	0.4169490399740054
77609	other	other	other	other	FUN12-missense_variant; RPL11B-upstream_indel_variant	other	0.007403626397444372	0.04368562405251551	0.012505747413412037	0.07052658164531657	-0.08142421208190218	0.1255639497020455	0.048598536500638376	0.05235485615519928	0.02005198957541269	0.0592868710733959	0.041865597575920864	0.06100802178960338	0.029282963571340536	0.03899684394901653	-0.011124567707376621	0.037535891592326	0.10031662816563937	0.060009055795605525	-0.021981814703584623	0.07587826198164538	0.046844402901453634	0.0885520277905125	0.02522825504300591	0.0702776277599365	0.0557827295273485	0.0877939921275944	0.2927681089731035	0.19434468798891516	0.09717056284925904	0.18994612188433727	0.13477194353747454	0.0918908944965291	-0.01639790754692251	0.15609445435487782	0.032442611101384286	0.14254748776475418	-0.02827962400292607	0.05586715425948398	0.03698141102956092	0.0867684295461369	0.3259776204226247	0.13601965905292912	0.18151827269402826
77824	NotSequenced	NotSequenced	NotSequenced	NotSequenced	NotSequenced	NotSequenced_adaptive	0.34629643579871033	0.02296534497268142	0.3741713666945574	0.031115848061249205	0.3837189962860891	0.03944257618017763	0.4673408297760554	0.0249820073019656	0.4271719545626872	0.026710865311233397	0.2999325831267312	0.055065405349363716	0.5929211465865379	0.03373055514467382	0.41823274004164057	0.032328454931691515	0.4189022140176032	0.02434165558057058	0.3621160966975937	0.033492326638604804	0.5328273411901098	0.03963559339317618	0.5799101264219999	0.02960163492615505	0.4641857010735865	0.053393819413332516	0.3989052091302551	0.04322341330320514	0.5286127271318953	0.05647895343190091	0.3761560151198947	0.056701546391807064	0.5708043924337385	0.07539366645874024	0.2607025147155597	0.11468163224240535	0.2214183258242032	0.038981365026184135	0.15271450752512747	0.06595395892463499	0.4156696085060063	0.0612469371390392	0.48859550413140207
78232	Diploid	Diploid	Diploid	Diploid	GAL1-synonymous_variant; ATG32-upstream_indel_variant; SIR4-missense_variant	Diploid	0.2488068026409645	0.029048564194793743	0.2822179317134325	0.04254210861297235	0.13966015327590678	0.06655023445671597	0.14863851734296246	0.0325061241678896	0.2654673965547087	0.031884331547041365	0.4463573517515402	0.06008791822288879	0.4310201271029857	0.03811543638209797	0.4466427635702292	0.03656129083634488	0.06159269798503896	0.03536242288712408	0.06284774028732767	0.0463876547523876	0.4635566457411354	0.046914072634661685	0.31590579227334226	0.03571987562266112	0.3976336569165424	0.05722530759339399	0.4061262961892609	0.08592894362082995	0.3722644981976058	0.09517783632777854	0.5513283414562328	0.056306061937262064	0.637841291317931	0.07292003310717524	0.013824547816268915	0.1120445803823356	0.2487642680489405	0.03622031168407735	0.2847468031869013	0.06344487035747144	0.498607740451381	0.03759393118190421	0.4991957167125081
78573	Diploid	Diploid	Diploid	Diploid	FAR3-frameshift_variant; PFK27-upstream_point_variant; GUP1-upstream_point_variant; TRK2-missense_variant; YNL033W-upstream_point_variant	Diploid	0.28489774300280674	0.02937512366303935	0.2528971759106276	0.04421775370314213	0.12540479077878566	0.0658921042228561	0.2325334032936821	0.032594673994441624	0.2847702380583828	0.033886127861031574	0.4825072105041955	0.05528929373999657	0.3633323765212089	0.033415957261631705	0.4627734255589136	0.033668908579955865	0.17358515273591207	0.0336779919262022	0.1810973560485904	0.047051553985629685	0.4824823742840626	0.0488646310125442	0.35964055195316097	0.03771086238995178	0.4218831664632385	0.05847855527083842	0.3795858503680622	0.09035732165631664	0.4713311734456264	0.08331911348053317	0.6561546221492527	0.054337027028031684	0.7273158967275101	0.07107201740090824	-0.048632882713666975	0.11559779397782124	0.3009227059738328	0.03451908671651348	0.3231700669609537	0.062453265355994415	0.5910398519658411	0.04639653324822593	0.4978995829711883
79953	other	other	other	other	DON1-missense_variant; SPO1-frameshift_variant; RAD16-missense_variant	other	-0.019457144519769043	0.03003758953352948	0.05360388267703156	0.04149190982713892	0.5258128374165325	0.04828931715482724	0.11387343540860033	0.03346450909732972	-0.0675827990221224	0.038391836624912606	-0.004825029607962891	0.06343697993769913	-0.018161045837437592	0.04178066786700518	-0.013370323986658364	0.0402758770637284	0.13782299489412758	0.0338704152225117	0.032744294600489735	0.0454994675926669	-0.10965792023280127	0.06411240572561555	0.047489026559905625	0.04380695322388509	0.13790275850007652	0.06516799514288843	0.3430599161316661	0.08290941148615434	-0.03156675592750175	0.1244704351319797	0.04179878209080453	0.07166692485977527	0.001981250427248493	0.09798709763750983	-0.013772308759412587	0.1164571168490554	0.010825901028464507	0.03896532143113477	-0.05499351561836595	0.06893883508352278	-0.012419317711633085	0.07672968651680982	0.044369404695494885
81798	Diploid	Diploid	Diploid	Diploid	RBG1-missense_variant; NAR1-missense_variant	Diploid	0.18035829919514312	0.03382974662641584	0.346567116229373	0.05193210751981996	0.2661070366754553	0.08131341231928006	0.18750977829268947	0.0368522127767225	0.2625467421267987	0.03739724301052368	0.2840939516654573	0.059138455597242665	0.4849464648455041	0.03776198610006485	0.3603557186082737	0.034627169585791866	0.13193861100728665	0.04139169269110048	0.27020274602179106	0.052127590488662334	0.2500110894565473	0.06070228356319929	0.3352877586705063	0.04053302738466553	0.4154713582933123	0.06201369405899593	0.4374033076116535	0.10642355379867699	0.3693769178953182	0.10806236278012518	0.4875391535280046	0.060677617034127634	0.99791116132023	0.07281890694498049	0.09802459064205456	0.12809197917637682	0.2347467568959325	0.04162025441748783	0.23789530594585198	0.06798397551584731	0.6323046812563816	0.05377260167681462	0.4259983706293394
82806	Diploid	Diploid	Diploid	Diploid	VPS36-upstream_indel_variant	Diploid	0.20127150748919587	0.034498369968070645	0.3728679195482528	0.049398694807697666	0.1382810960814255	0.08989416163455109	0.1627683768210503	0.03813898499899385	0.21334094564611145	0.03991617836205441	0.43786314974405344	0.053986650351606685	0.38436650113129534	0.03243161303441056	0.3820159858764882	0.03235243565053484	0.09733453315135347	0.04243221933431349	0.120252626259725	0.0565403788470395	0.4761880160829645	0.05633762332679265	0.30963052278259434	0.045364054671180105	0.3399637695267019	0.06408499550476697	0.3192376636191828	0.11841571938328033	0.3509473087290964	0.13577126546281207	0.4173053982082983	0.0603687234195056	0.5190730221571057	0.07964214653613075	0.09322585234082828	0.12455276029245345	0.2340427586159623	0.04049907116779918	0.2308906737888163	0.06773615608437585	0.4975706341263033	0.05088566608588668	0.4745767884704657
83255	NotSequenced	NotSequenced	NotSequenced	NotSequenced	NotSequenced	NotSequenced_adaptive	0.1799513887357264	0.02492911664351137	0.38501106271979735	0.034469448532831695	0.15582020909447475	0.055196068896131566	0.19979590561640687	0.028693591668809373	0.2525902291432671	0.03023131690641596	0.3962032962837708	0.053767618656089415	0.4533118779588984	0.03212832749124902	0.4180619596078559	0.03194718552765332	0.13828624967682682	0.02890210655007165	0.18302127009682226	0.0391164856326903	0.3605743443398326	0.044509788555091516	0.3328827096407065	0.03238956084896148	0.3396735874304056	0.055518873530039536	0.2110631633034416	0.07213885609529846	0.4626262780118637	0.0705847692535532	0.4695834759976678	0.051338306074411186	0.5970395444554526	0.07040812273182384	-0.08141650001719343	0.11439060305865598	0.2479868322715093	0.03373072352982625	0.2632463133985425	0.06050696094315448	0.5289706530509724	0.03445286356877027	0.464037916995842
83504	Diploid	Diploid	Diploid	Diploid	None	Diploid	0.23352915006051586	0.026308476479022947	0.3841085007105527	0.03657327404816547	0.16280045284113245	0.05773860419611256	0.2432773227448801	0.028962612003047256	0.2969455707473587	0.030786286928246108	0.4242861685944614	0.0551069590059457	0.4618229374998572	0.03353847017913431	0.3841987577113885	0.033171299858092564	0.14024095865536162	0.031061635334827694	0.0929708077974126	0.04292524440726568	0.3632939923615437	0.04459346240709392	0.3858013085962561	0.03392548492965022	0.3580279860668755	0.05691996418306707	0.2822091122397621	0.07226133823332186	0.49694663828397	0.0750443155628231	0.5028924955310857	0.050634909280223066	0.8308828761277006	0.06945219978593697	-0.026583907996337947	0.1093843441180986	0.2768293793542864	0.03402283858560825	0.3088945193796109	0.060633952308781186	0.6354390080300968	0.03758477750677544	0.5201467123184441
83967	Diploid	Diploid	Diploid	Diploid	None	Diploid	0.26172088358202616	0.02890359788698779	0.3924315697045678	0.03921281295737461	0.14866268702559354	0.06959498860577036	0.15685949861557014	0.032271791480810864	0.27112834663613544	0.032853746069616635	0.5381006781121023	0.05430584836034643	0.3502590475453927	0.032484306938152	0.4362169384905538	0.03280978046277472	0.09199483766998004	0.03486350215259015	0.0723779222497173	0.046938247527453736	0.4074004810672038	0.04932748650580626	0.3229651514187655	0.0363876588505658	0.3930822473167083	0.05829756473048366	0.11399612335343208	0.0930002955597812	0.4426632293316621	0.08857392297848522	0.4060056869559098	0.05533406787751317	0.6228673085593802	0.0726294826323882	0.15778498114297607	0.10815159679843094	0.2715497318471617	0.03502804535619014	0.3441716931585601	0.061883902863230686	0.4953390015971138	0.042049301933152435	0.5066252131048429
84597	Diploid	Diploid	Diploid	Diploid	None	Diploid	0.2440272356253789	0.02657381255039571	0.3130769718768863	0.036582966788093786	0.15334932528342124	0.057472740780032526	0.19513139746785635	0.029105662383017414	0.2968473940835695	0.031045833915819693	0.4992982916033698	0.05484487858763178	0.3646936266237346	0.03302458081115977	0.4379670596820151	0.03320853569515809	0.14133980169023644	0.03033598218651704	0.07368564821738471	0.04187977565193421	0.38961253293676623	0.047330502167843735	0.3307900106628526	0.03382582638739585	0.3779643715931012	0.056733262919990764	0.2295635804620039	0.07575511497126172	0.4157526665219424	0.07971509017815331	0.44783868942692107	0.05228754135179015	0.7621679306009341	0.06987701873058765	-0.01007704837188797	0.1096927352054879	0.3042985928067142	0.033576092428161626	0.2949541669090697	0.06020443563189212	0.5260016838844602	0.03553630299919494	0.5242803959678785
84997	other	other	other	other	nan-nan	other	-0.012943844289375131	0.041106275118914425	0.10620455981330013	0.06262899568369776	-0.01836689040619837	0.11540262860129742	-0.07051198695783867	0.05174961594946188	0.043129862128635926	0.05911421959419193	0.04689933491658528	0.0607373232647269	-0.0041834777258177285	0.03910620091997636	-0.012862180136323335	0.03803713459740105	0.04041788631448097	0.05254234444327919	-0.06550935071507705	0.06540754589047951	0.071709620357498	0.08519508061669866	0.032611999611023415	0.060942024965423024	0.03221806969093104	0.09023950180549936	0.12403555868048345	0.17697073487439932	0.4296977327671967	0.2062968859462743	-0.0009623071778311324	0.09264501553555962	0.15970263778151192	0.12971894385762092	-0.07589174672490302	0.13853856488780514	0.03146198544700588	0.05276306919845476	0.11136040151436152	0.08021674199779896	0.05119668420865694	0.1326908692842924	0.10018704091859268
85751	Diploid	Diploid	Diploid	Diploid	None	Diploid	0.15736498725501952	0.029226956526945687	0.2910618044644179	0.04105795836765594	0.15078561869111234	0.07114426840175216	0.15198215930774697	0.03266783455912566	0.23657792705627095	0.033546205509184406	0.3905494234600488	0.057985098689968075	0.4436754593082505	0.036379839154954366	0.4155061666571682	0.03447832322757892	0.03459975068719379	0.03481667712803773	0.0515878282807998	0.04709573505361006	0.31260510103340816	0.050925928495383625	0.2889499875956046	0.03737378185180629	0.4764242387135406	0.05752348708755727	0.3186736499971697	0.0947734156105728	0.3097411416459831	0.09989924425067938	0.381488544267344	0.058154241537399926	0.5154618821196181	0.07456082741477825	0.06717756716473032	0.11063975558804376	0.2933440094741667	0.03727414632566997	0.295986844775147	0.06334074852528868	0.5020434923180667	0.03919729385665709	0.46113304913773706
87689	Diploid	Diploid	Diploid	Diploid	ZRG17-missense_variant; UTR2-upstream_point_variant; RSN1-frameshift_variant	Diploid	0.2515762143221864	0.028700502202978293	0.1535102257808088	0.04263526530870772	0.1479110776121439	0.0645003011266019	0.2426103469162645	0.030402809189987275	0.322288936815708	0.031726558241763486	0.4495441212608393	0.054634838196582367	0.3861688652808959	0.032753454087384296	0.5021132433431211	0.032983569124679105	0.10767562301969376	0.032923885987672534	0.14110413044666525	0.04409787684348821	0.6126966065177394	0.04548068438816258	0.3327442313852313	0.034650772524950905	0.4200636886638333	0.05736804670489167	0.4533763077050029	0.08889820718752281	0.4742895695892516	0.08083461243132566	0.4168433628853118	0.055344826776444034	0.5947439202160402	0.07271515704238113	0.06078433991553416	0.11492909127585126	0.29500453206493044	0.03470300338583755	0.2665858820357813	0.06232976341023596	0.4896176319101968	0.04371694687110951	0.5186087162994508
88494	other	other	other	other	SLX5-frameshift_variant; NCL1-upstream_point_variant	other	0.2926230602222113	0.037004206568010484	0.7885674061809649	0.037939398340167865	0.8075729235615652	0.0521990839300364	0.463118296824316	0.04428418911369174	0.20241816689572503	0.050598267528412115	0.030921314154589607	0.062205253610268664	-0.040390262352048414	0.04063431555645915	-0.047813957296808984	0.039325835429358205	0.2839031859800778	0.05018652423289633	0.06420452593557954	0.061676677163373286	-0.023680921796464048	0.08383727220646611	0.626039932646029	0.04578071471095477	0.3899448263744691	0.07111198444999949	0.9551297686940208	0.07552507919201015	0.22502035269605214	0.1983645680116951	0.06755050107724653	0.09202026121791827	0.039263464273065256	0.14173843606393105	-0.014809931400549632	0.1523806750662132	0.16181363446952346	0.05389836225813521	0.3845509504293445	0.0739708172286234	0.35825657517619625	0.10831184547748424	0.164793487321495
88706	Diploid	Diploid	Diploid	Diploid	BRR2-missense_variant; GDE1-missense_variant; GIS1-upstream_indel_variant	Diploid	0.1892934376056802	0.026452371614132168	0.34806971603898346	0.03725322468652576	0.15202445324332484	0.05953110355873785	0.1658951774002937	0.02977853895866538	0.2592532178187294	0.03101457147472684	0.3700100192838734	0.05305020339977308	0.4493244390071524	0.03138302659401334	0.3894558467035145	0.03145672376986597	0.14039601316374914	0.03108439136116174	0.10805547804330708	0.0429280231580605	0.3101635101913419	0.04582073381908739	0.3143685312171828	0.03434700357961923	0.3983991677863883	0.0563831376509841	0.23387805586412794	0.07419386671949298	0.4756240035836994	0.07750977202244809	0.3513120020882086	0.05266663306133953	0.8178159882044803	0.06994008280492181	-0.03835575595359991	0.10938044456977553	0.2655810494836021	0.03472113981858903	0.23824849913369645	0.06146995295451264	0.4532318864608264	0.0442369405663692	0.44863021931588737
89848	Diploid	Diploid	Diploid	Diploid	None	Diploid	0.17634178343894247	0.028448111585153164	0.2857892626440324	0.039686434047091136	0.2627894820927548	0.06196428675512045	0.23303604192188135	0.030936617204670527	0.27787218515729084	0.031420048185106686	0.4447082921704961	0.053493688479425185	0.5284694168743524	0.03170811902639434	0.4545674997105607	0.031785610551307325	0.19403506415672764	0.03173668335752044	0.14378588156294092	0.0432567253894129	0.5161855603376262	0.04442136456388512	0.3702073687803688	0.03468045159295032	0.39746227296566383	0.0574804325047007	0.37613776223342704	0.08529184717869129	0.3963975588135676	0.08396266794514767	0.4891688261666334	0.053268231196483384	0.7175577884877959	0.0703876076182321	0.07273660150448648	0.10711604204647088	0.2608872003929636	0.035548511535041724	0.1973401804134942	0.06273913253778189	0.5369780669642299	0.041450871999106464	0.5005420153219631
90003	Diploid	Diploid	Diploid	Diploid	SLX1-missense_variant	Diploid	0.3145849032900571	0.02496561579156456	0.2896459022424047	0.03570101967837348	0.1702707260732544	0.052674117780598335	0.2514853044932775	0.027655914061235014	0.31298957452988496	0.029450335800709725	0.4776658636399129	0.053827389791687635	0.3918005404872715	0.03177051291754697	0.4663945459984773	0.032396292204072766	0.19554646993422026	0.028715837995162106	0.16627386112496034	0.039718234093503765	0.7141974228956862	0.04361304189344607	0.42118294122197697	0.03265388102964666	0.3968945941977892	0.05540955810455503	0.3965142768354339	0.06429084835548075	0.44854812939864175	0.07080119933629117	0.4961597326374067	0.04970274995734537	0.7132506621606021	0.0693646013592644	0.2690130108359139	0.10422760572851032	0.2593160619724022	0.032731559892896625	0.26803777050626904	0.05976524517385263	0.4667521568942952	0.03625177922933808	0.5559682326661322
91807	Diploid	Diploid	Diploid	Diploid	None	Diploid	0.27410956580020857	0.02839206852166563	0.4196816406622921	0.040858504887320964	0.11154509932430122	0.06671477679310908	0.24983097489812225	0.03166721581006645	0.2816238130980247	0.033740876653924584	0.4979395436720955	0.05484998771139533	0.3533152470911965	0.032897757627362065	0.4314534548882006	0.03311389456041361	0.1987072814575796	0.034630749120824214	0.16564827774256458	0.04715656176981603	0.5991924925727353	0.04769079349426483	0.3638437027098178	0.037045279293945466	0.3872427999214694	0.05877457921329881	0.09581927065199487	0.08837656623305955	0.391420731427275	0.08853702813199958	0.4876899567792952	0.052597005830136496	0.6212941935301258	0.0721527977759102	0.051717836134799834	0.11147489846482816	0.2632848797425785	0.035373209535001865	0.33732384623208866	0.06202752931419943	0.5833518350434789	0.04145369924187616	0.5306616165104001
94393	NotSequenced	NotSequenced	NotSequenced	NotSequenced	NotSequenced	NotSequenced_adaptive	0.3389412702381498	0.06844138957827134	0.31629203588108284	0.11012472073427436	0.12054549049207446	0.19397563631442308	0.2512601991680109	0.08368833310168614	0.2960231544796492	0.07049993282784145	0.3944877059146543	0.05869177115384976	0.502503869448861	0.03677855110357011	0.4214783279708293	0.035466914333103686	0.17950570166183036	0.09436106581648183	-0.04163899861936196	0.12109473363555184	0.7423193703045827	0.10720611203073073	0.5071310739500867	0.08391230936300223	0.404557977307848	0.0972260726775119	1.0178879523251312	0.2848508354373595	0.16038684702832026	0.2606712204133235	0.4803267821236712	0.1133013819838306	0.5204508796622439	0.0991994395961776	-0.10968287042775726	0.2774983777411625	0.2305564402559751	0.07179048413869722	0.37570749788782704	0.1098589910873504	0.3623023634563327	0.1202325949053336	0.6865638505434406
99005	other	other	other	other	nan-nan	other	-0.06180732870606433	0.04692465283831243	-0.03420222366597656	0.06892051464262372	-0.07867197637628723	0.1190259789985198	-0.12629985232998195	0.056821114605644374	0.045293115170274484	0.05717374749562405	0.02942970953086769	0.06201125491925567	-0.07127168815890142	0.03996927042192512	0.0060862333403398396	0.039931624082671535	0.009096538958311036	0.060454560507054375	0.05329850580244433	0.0690284058931759	0.04603040210096145	0.08304804246490416	-0.07941055485257688	0.07039170839618282	0.054588183398689004	0.08453643886366799	0.2382707759203305	0.16626214367297126	0.045892476515232566	0.19523855941976276	-0.0030399494916190906	0.09367001537466227	0.4536305506505849	0.13437341751076234	-0.31050737758285485	0.1747091928279346	-0.012448337524971516	0.05462571596006307	-0.0026499212294613323	0.08858998981622405	-0.05312852710506998	0.15492322171427172	-0.023856359653370195
99035	Diploid	Diploid	Diploid	Diploid	None	Diploid	0.24428566905365834	0.024526132390090584	0.28321909907203024	0.032945776072761064	0.18003922050128693	0.05130635218585095	0.2354899636299648	0.026820943068298967	0.29050312455879324	0.028426293276471105	0.4069996676211948	0.05613629761687629	0.5452640337560172	0.03441937065043876	0.4863813424007402	0.033451537292018184	0.18994379895610125	0.027021085121917195	0.20162752398563916	0.036989746743770965	0.4270659899719006	0.04177369114115068	0.40302219193254185	0.03197995315404077	0.44719319554190456	0.054278174218189895	0.33539374837426544	0.06601184376415974	0.4385945958200193	0.06731536037833223	0.5343380657941355	0.049497739833010375	0.7336301280951377	0.06867255405818802	0.048245079000090535	0.10662250190194916	0.3107804462958789	0.03245394233483157	0.2705462280633767	0.059551404065584415	0.5678701990555908	0.031127879471492505	0.49426457550781605
100501	NotSequenced	NotSequenced	NotSequenced	NotSequenced	NotSequenced	NotSequenced_adaptive	0.2305549383186989	0.03001665349405648	0.3196987007896417	0.04326071505431478	0.16402383510502516	0.06609997592119883	0.2281848995172667	0.03210385047019845	0.2929222716524085	0.03309105263852249	0.34092131597829345	0.0589716866840596	0.5832758218778807	0.03738962209216647	0.4307348920161491	0.034370578683264805	0.1284103225518078	0.034359810800835236	0.09551372493128976	0.04778621972722832	0.4077900743871753	0.049733176765764005	0.3590400100209493	0.03631581231674066	0.3915545248731691	0.05888663625767309	0.2818454783552297	0.08890625051532705	0.4472459112435452	0.08784706109812715	0.4957047062863664	0.05623052960894341	0.6468742192644317	0.07234765102358105	-0.011619068766533252	0.11568119100774255	0.28802170385288073	0.03756112238338823	0.2578917871367984	0.06424004559900091	0.5775569238490924	0.04342731899035214	0.4914588226941257
100895	Diploid	Diploid	Diploid	Diploid	MUP1-missense_variant	Diploid	0.2387616530194404	0.025307576079604727	0.24062515456635544	0.0362595900031577	0.15103209997803554	0.05492519702480152	0.1934113717062308	0.028504566116058363	0.30495035296217504	0.029972268546096213	0.4810458292287008	0.056388681218707215	0.3725236040702457	0.0343796975326323	0.44991896254471203	0.034360659012479984	0.1374718463015544	0.02942867584803257	0.11518330718541706	0.041098960986840495	0.5650858647702441	0.04343150644572323	0.4160438053973336	0.032906545222970984	0.3950110379870714	0.055450723243964696	0.27803269006793474	0.06899529101351856	0.431663541009177	0.07097808814026127	0.4948148085762454	0.051622036118938855	0.6296455689854447	0.0705835952892546	0.1810187083087031	0.10673551983249867	0.27050349621284925	0.0330533029672233	0.3144530473359226	0.059976824120328724	0.4947006535914667	0.035872450066214395	0.4994919371644959
101051	Diploid	Diploid	Diploid	Diploid	None	Diploid	0.19605228512885955	0.02794328224744995	0.3866861044700488	0.036801702116455635	0.1461829619537424	0.0626405171448266	0.1843916658226376	0.03030959988043141	0.3284974372471413	0.03156853237307475	0.4369360515063542	0.05753371547360873	0.4708302229584403	0.035798744720748024	0.4152773969176081	0.034226404306401795	0.12743455749599558	0.03197936406102688	0.17713300555271255	0.04178062908368285	0.506725605410195	0.044081445539836735	0.3445757368464094	0.03410846086738654	0.4237426026350455	0.05704468583636053	0.25378121907598583	0.0780946282555153	0.44869459012846974	0.0799261258960991	0.6016273069334112	0.05055272882839553	0.8892271616635107	0.06887291541978524	0.04369436662053846	0.10878434958120778	0.31402940485658265	0.035440359529693495	0.31582370792510883	0.06147979293002121	0.5026832890359133	0.03731369448581004	0.4929047905462599
101506	Diploid	Diploid	Diploid	Diploid	None	Diploid	0.1952952733536925	0.026627833604115442	0.4025343806048731	0.03679895801810197	0.15502948761401658	0.060597769775885664	0.18225874257211847	0.029637241901924575	0.3712850306075077	0.030677363550247694	0.3874061410233711	0.05861951403407699	0.5526786621366717	0.0371550687866533	0.4315676167841309	0.03455965523209038	0.13500134808093056	0.03141086521803984	0.11312675174212627	0.04266770596527266	0.5528318048743533	0.044442259609412636	0.3338405279531181	0.033540898265019346	0.4038635133926565	0.05622744988949396	0.09288781920633044	0.08298668864709237	0.4752253405328784	0.07687290284287683	0.4555350938476298	0.05226849524655172	0.829593132967848	0.06941561530685815	0.13252792906337366	0.1076912490436364	0.2949764344134054	0.035341057605516285	0.3177977113124708	0.061049103464146826	0.4705392441952685	0.04179405210883151	0.5354291731622163
104216	NotSequenced	NotSequenced	NotSequenced	NotSequenced	NotSequenced	NotSequenced	-0.03905577707121636	0.03772611132723108	0.01780287547286111	0.05678832578802876	0.11273423360561455	0.0884300534725474	0.007426387909292177	0.04208425144055742	-0.06956717893525198	0.05175056526140072	0.07492492268233984	0.060538512081573674	-0.035680021675873	0.039015296003276134	0.024385347899918447	0.037956328950560086	-0.024662688938410945	0.04917937867153414	0.06302544837868973	0.05636709352695909	-0.0193867173803324	0.07793510340525195	0.011464326395101929	0.0563299111876452	0.02278717025809647	0.07597643758219746	0.26547236426919085	0.1363936533657382	0.1427099756378821	0.1275789665332889	0.06038414118441021	0.08175622717378422	0.12058355342854565	0.11358067430790038	0.190032524654659	0.12313645996450295	0.05516630063018897	0.04758983684729398	0.04628562074533782	0.07713190341259167	0.2269928055972629	0.11638638138464125	0.1009360948844152
104261	Diploid	Diploid	Diploid	Diploid	TPT1-missense_variant	Diploid	0.19445566194257397	0.03374612841752462	0.3444673934409889	0.04733350113902774	0.1228987841222426	0.0822655118324382	0.11985112074177093	0.03844186063554635	0.2512077811342333	0.03736479192967674	0.3515760762209028	0.05680585341878984	0.6360095677318351	0.035248513206432505	0.41703040612734615	0.03337699139552062	0.101154424389534	0.041953239009580666	0.13502735294626056	0.053512151230155694	0.4675985809200264	0.05538051980158528	0.24721117229225034	0.042270957583632286	0.3974730937087818	0.06038105389023288	0.2906424476589424	0.11064586823980016	0.4822253647295082	0.09914377095568236	0.6338114653984718	0.05548613042177975	1.0240431845269442	0.07053572893749101	0.04408653840708536	0.11190925114405198	0.3222880147798882	0.04312868268492148	0.2588924294333151	0.06832064127980733	0.5092987037101409	0.05996009602410414	0.5360174288256003
104349	other	other	other	other	TMN2-missense_variant	other	-0.0497947090346903	0.04321988582190912	0.027363167619090002	0.06641808988923208	0.3161652946019953	0.08258753961512885	0.0023388883320463283	0.04826303803052575	-0.07535520585913866	0.05784876623166633	-0.01917053094851084	0.06348357159307562	0.19920088286175733	0.043233009075444806	0.06165991824068912	0.03751175898309984	0.0248734790777774	0.05418064978159072	0.07812089176992636	0.06233273580186996	-0.06806605683296807	0.09440085084331737	0.00996953028989933	0.06385275030944294	-0.00197856022226389	0.08430952270538854	0.4825742322150233	0.15379718176266646	0.3551432429115049	0.1859694791990462	0.02108930889430647	0.09397472753554748	0.08037521489454631	0.12466473146233885	-0.17719550185203053	0.1495430041124813	-0.07492448410805116	0.06052052309823028	-0.1330550529184673	0.09084507678923152	0.02199978634530062	0.16488355645170588	0.2861162840205373
105497	other	other	other	other	nan-nan	other	-0.011469898484210523	0.03518240728914481	0.08699658219659055	0.051928761820469474	0.2881464048464111	0.07382593126992	0.06384165380999797	0.04243381957841068	-0.06927128423066148	0.04708598455435162	0.009072803315454474	0.06182690091848761	0.027078968753647976	0.03993441300335652	-0.03625824018203818	0.03886383020802127	-0.024350862442344096	0.04624177415695917	0.0468452159017251	0.05757076706885895	-0.035467523915621565	0.06866847742272937	-0.031892044702236874	0.05434429322023264	0.24374528583838326	0.06804232068667046	0.2504421326613053	0.11919867153265774	-0.0008868217335058297	0.15293222501600245	0.0719661475164551	0.08112431352283159	0.3926248894905937	0.09164895763761596	-0.0703127103789507	0.1254416529339783	0.0255559447571387	0.04672776400848698	0.01214831600498882	0.0744974369966215	0.319533420165187	0.07783969618290616	0.020618580465814555
107286	other	other	other	other	YGR164W-frameshift_variant	other	-0.024965582972759852	0.0356001627839861	-0.02355507181935438	0.05555600627098689	-0.0909703490066749	0.09468340697587932	-0.055032612959039516	0.043103721456548616	-0.016351741079171745	0.04598452232326365	-0.024097731020792136	0.061971756198491226	-0.003722864387030808	0.04069504982107525	0.0029783889857182143	0.03809787081796875	-0.06713789843325126	0.046467198495236686	-0.019079463989294915	0.057430048473617476	-0.02198754815575759	0.07246900525412908	0.06589281585720441	0.052252708990526	0.0192450517443364	0.07551017305198147	-0.18882899182473906	0.1801799381332786	-0.04522901821924926	0.1876247782125378	-0.04346280210925182	0.08399633533099639	-0.08975588665851086	0.11739496525249744	-0.12216626249241727	0.1414651272482005	0.003491657409571131	0.04712522529455777	-0.13008857005307442	0.07787520241267475	0.22307233534864604	0.09270348097720596	0.033804125634349765
107751	other	other	other	other	YHR145C-frameshift_variant	other	0.004137300301054082	0.04090516919315846	-0.09062142137741257	0.058792226849673564	0.025955378270939	0.09786668358274846	0.049146478973087014	0.043632348870892776	0.0785922135023131	0.050024716176723334	0.0981333545622999	0.06480797921678852	-0.12265214286236326	0.0426451881412044	0.015453945153384491	0.04326746498444388	0.08995083515530948	0.047364405818616666	0.04512786446820219	0.06292696768641598	0.1233024884755039	0.08083191337183045	0.1197161630306854	0.06209610307047817	-0.11205433933851	0.08037168952394305	-0.022838909289739254	0.1360271262519466	-0.06251012490092958	0.17472697218955344	0.09458259695241772	0.09141470944224643	-0.02206800011356349	0.11376600256101012	-0.21613386268748574	0.15010680226340753	0.049742458304762566	0.04445679450407726	0.04029023618089437	0.07685020487261582	0.07830784301403912	0.09352707053471432	0.07005747099250308
107859	NotSequenced	NotSequenced	NotSequenced	NotSequenced	NotSequenced	NotSequenced_adaptive	0.3263731506775093	0.05198494372925687	0.3038198679503982	0.0805817194673096	0.18709778748923706	0.14462611307997086	0.19322843468188092	0.05784140130026074	0.1972991989697858	0.06031577632311776	0.4130659423774876	0.054604868177963874	0.41025766214725107	0.03281968255320978	0.4438872636555442	0.03277890596638115	0.2391264571606991	0.06548332630621162	0.28710040312992896	0.08459539099694012	0.18622774970681508	0.0951450939442127	0.3879597808573127	0.0611945146992993	0.3681841556969811	0.08469840650389343	0.32516619165701777	0.2689858211024633	0.461879499082347	0.18055096436654747	0.4988430138128338	0.07420762657955841	0.5278191359443083	0.09331888551548598	0.4942077280190755	0.12807171167848042	0.28623605934603197	0.054573677572592176	0.29340566607998525	0.08503861246042871	0.3869127705375491	0.09198058601834104	0.7198532407059388
107971	other	other	other	other	nan-nan	other	-0.02147637842481263	0.03711869946867998	-0.015540801515244874	0.05501112385494726	-0.010516987775429216	0.09540753288919653	-0.11832184234774898	0.045023243758525455	-0.0025049667880673197	0.04656327171114205	0.011072197237254023	0.06052678489154473	-0.010408716516119493	0.038755377172101216	-0.011872625655764949	0.03775582972687589	-0.03278022570787596	0.04777621051197704	0.051279500829764936	0.05449200539758716	0.022719373612097082	0.06516327663287343	-0.06576556737549161	0.05568591021906838	0.007333990863133256	0.07458659423554323	0.07194869896550303	0.1439840198604906	0.22100610420352584	0.14072980932379542	0.05641510661836392	0.0785198629018778	-0.10306447242039628	0.1145091795628156	0.012990545268153152	0.12314180426815335	0.001026247088772696	0.046836542949364485	-0.04368841188741617	0.07543001593431868	0.13711355503285724	0.08803447885155036	-0.032148364595501626
110443	Diploid	Diploid	Diploid	Diploid	YKR104W-synonymous_variant	Diploid	0.23968690778837864	0.032762791825314115	0.3400302202344413	0.04942339887679476	0.3368124032292345	0.07936964439346167	0.1532135104116154	0.03638147591541231	0.1924548382170725	0.038024619217442615	0.4392645535968611	0.05466972943720999	0.3368658700437355	0.03292984753233425	0.3745493002041756	0.03288559739253827	0.06672409870436215	0.041240994986561	0.1316074779542635	0.052443691931125656	0.34414027805538994	0.0541717558775367	0.36138239945114414	0.042443276757438905	0.3999705033174992	0.0621666364606871	0.09271276517907526	0.13457905067335946	0.4706639914371236	0.11667021816229613	0.3232108454335725	0.06736836976205836	0.6576424174332292	0.07724125040513281	0.1754951240730837	0.11768525609078227	0.2530818673473937	0.0393985269405566	0.3233921956059999	0.06586618619575464	0.3717984334299201	0.048131941371528916	0.4168526707147828
111905	Diploid	Diploid	Diploid	Diploid	None	Diploid	0.12580453668347785	0.032789227602215434	0.2673627820609928	0.04278598342575258	0.1596731251517204	0.07560644310562947	0.13826713432356133	0.0347406354704472	0.2748317290705597	0.03620512613354503	0.29465874744334386	0.058667476935885914	0.6819947329499152	0.037964257038699566	0.4229758840682633	0.03354128270302234	0.16598904941401105	0.03565476531719824	0.10244553286040796	0.04814712545733525	0.18303784980431173	0.05780063842567769	0.26919250330754313	0.040462588727757806	0.3815948261364335	0.06051945982623558	0.33870860427701704	0.11151515279972868	0.3102151729227061	0.10310252247636764	0.4126189605874389	0.060687849418894775	0.6798530825957761	0.0754060335743618	-0.19504048146495653	0.1202377597437093	0.3101334340639241	0.04109008472436981	0.2020411779116542	0.06706116119572476	0.4714729017964984	0.061960564375575615	0.4543129672347284
112239	Diploid	Diploid	Diploid	Diploid	None	Diploid	0.24724977210739496	0.02757701595415072	0.3053490178096762	0.03862405785473818	0.09401797711089524	0.0630482446354489	0.2724203176498667	0.030238466779280944	0.27854721755716355	0.032126710054395616	0.4190463624006347	0.05584776139437203	0.4256151432366187	0.03416608638983848	0.4702247127922661	0.033517743896303215	0.14656981550487544	0.032548960615082785	0.17617181247000446	0.044347742003920256	0.6727330484740932	0.04493517339729272	0.3880761526529509	0.03507406714358865	0.39253982671183335	0.057583977080415176	0.4364697997272183	0.08585719729803985	0.4160772935986713	0.0813211778094235	0.4260037479221897	0.0542857480850339	0.6472280772656854	0.07103403356911575	0.20136077676133526	0.10740233612036204	0.24242792171293145	0.035084346452053106	0.2570713266374657	0.06187462658579102	0.5436366142608843	0.04410892544200015	0.5044905471899738
113468	Diploid	Diploid	Diploid	Diploid	None	Diploid	0.2509744887565588	0.027393944115894263	0.3582414317321631	0.037990344921340534	0.20730061432960603	0.060751772027723985	0.2388539305908945	0.030491576492266536	0.33973341795396	0.033664780199382696	0.4740090218090248	0.054536845237007366	0.3827174622424195	0.03274052141227754	0.40564040695668013	0.03274051421060624	0.20528663960344895	0.031407618020706816	0.13035417226880772	0.04401077057139729	0.4117346292474749	0.04694243848193607	0.41018792877491256	0.03573441315296043	0.3410030393596015	0.05790918184831305	0.6266881490659915	0.07770021171228116	0.5445698519702673	0.07543072574305164	0.501724711970081	0.05271191277745458	0.784051395029461	0.07055236551701	0.10875590488256992	0.10792395714210852	0.2935696617841122	0.035213596165406064	0.32353011973978235	0.06139811486862168	0.4525599416793732	0.041172304935304466	0.5220031857771733
113978	Diploid	Diploid	Diploid	Diploid	HBS1-missense_variant	Diploid	0.2396874875997829	0.03806677803752607	0.4234221721607713	0.0550603317011882	0.22941140046504285	0.0947700128132926	0.2434041781212642	0.04147631819884783	0.33129265982442546	0.04219755354935131	0.3551243906606151	0.058031815757986965	0.5555086880963163	0.03627916721922544	0.4267006659933486	0.033948295307176746	0.1975434959467927	0.04682646112920354	0.09653864821821734	0.06487605710149312	0.3655976457730717	0.06377318408274564	0.41347893727732704	0.04642676320380397	0.39108298281170745	0.0655880906010472	0.6370886125138027	0.12695714825020446	0.3639921361932175	0.11907662067291795	0.6090543794621726	0.06224580139134055	0.7080378017710285	0.07528196093348942	0.17968659639102574	0.1189904547947878	0.3295589882094673	0.04678195919733467	0.27705050323721675	0.07202401768010334	0.5579327589087002	0.05610895281780929	0.5597404357456915
114628	Diploid	Diploid	Diploid	Diploid	tE(CUC)I-non_coding_transcript_exon_variant,non_coding_transcript_variant; YKL177W-upstream_point_variant; CIN5-missense_variant	Diploid	0.2795397216480286	0.03104763971921632	0.2890017138218859	0.046449090771752716	0.12614660797005622	0.07820896165961667	0.16455278307451746	0.03571066407827216	0.3586987610740417	0.0350194663088053	0.5088488037763577	0.06010358139940085	0.2710865167416445	0.038183565828890265	0.42212464964298185	0.03800032922598864	0.1644332786414401	0.037865049634211286	0.051415105110536194	0.0514907708992403	0.43788131586120704	0.052028007295136916	0.39887757186576733	0.03928391982165714	0.4312861152303593	0.059168323749699325	0.3184591573803602	0.10264570515010446	0.3855363920650278	0.1022781844192774	0.3623932657763903	0.060434983403749476	0.6133797189659196	0.07454710872514575	-0.015223888983688675	0.11237353464479873	0.2608852666541649	0.03837019276328843	0.30118996025263106	0.06411049590382864	0.474185466913074	0.03842685375056304	0.5091387317889589
115150	Diploid	Diploid	Diploid	Diploid	TRM13-missense_variant; RDH54-frameshift_variant; ATG32-upstream_indel_variant; RRI2-upstream_point_variant; YOL118C-frameshift_variant	Diploid	0.2302471083418389	0.03319113898594305	0.251700200302002	0.04744496284414902	0.08893599201257588	0.08089683614890936	0.27789208008080274	0.03412327061709328	0.2410432223314126	0.036233499773636026	0.41489408792263466	0.05673509532356974	0.4299805706478143	0.034960071040141164	0.4563706198838696	0.034239059336266336	0.09115822899316067	0.03904423272381551	0.11300027691019185	0.05121504658688635	0.38848058260545104	0.05510012921796261	0.3660094805628143	0.040798102144905896	0.39709665146487255	0.06100254860191175	0.26845018950598337	0.11795332100208758	0.3902409702272708	0.09909945778198076	0.4880314806340942	0.061207926474189385	0.7855846575672084	0.07167070473935991	0.14500675558925846	0.11720619788931586	0.29131729371124665	0.03805157188721007	0.25339527342756146	0.06565825211101392	0.4773341185846503	0.05448194061841589	0.5020482712797455
116916	Diploid	Diploid	Diploid	Diploid	None	Diploid	0.292878815957043	0.029303961365723837	0.3312077566716525	0.04371800044919676	0.10772412959736648	0.06677923405994626	0.2378607438067648	0.033183524682056355	0.3003171916988376	0.0340738707202469	0.5014288405800487	0.05507130920668876	0.3762465770037056	0.03294613548616854	0.4652456169092514	0.03337217192667158	0.2070889871561548	0.035128033065070084	0.14757952466346586	0.048402823937913515	0.4402360444827548	0.04890158374328805	0.4020932650655455	0.0371353914143165	0.4580056142961536	0.058761281278262315	0.2558908787907373	0.08802547885220915	0.5503639469715128	0.08202064680479737	0.5224847772864717	0.05412677343385816	0.6381090207236714	0.07253203063166329	0.11210182479523144	0.11342523965249568	0.2376624309060173	0.036271159504044345	0.3562106674027217	0.06305753874613351	0.4995084592837269	0.04037502418347514	0.5538413104058528
117630	other	other	other	other	TOS1-upstream_point_variant; YGR210C-missense_variant	other	-0.11384543533996655	0.06451132381356514	0.04458718696984048	0.09517944517251688	-0.058288397707250625	0.18185381963409464	-0.002854087539297693	0.07671698309194012	0.14211330305142053	0.07908647447788893	0.01928388449722244	0.058839130734317735	-0.011802409024125248	0.036924141374833186	0.010375505724757593	0.03670294355466467	0.08617814237760428	0.08246630689793685	0.2527192799270365	0.10728690179090794	0.05726440223431605	0.1137434848209905	0.12142359119266845	0.10867649567882152	0.017947399616594074	0.1037805098045156	0.2140415904897078	0.3048210938863092	0.5254723184534199	0.2881717562020334	0.005534589018456189	0.14860366413034062	0.2622469151527532	0.15079353121134126	0.2425887655263076	0.17488894909768246	0.10765510529127116	0.07251437098047184	-0.028493104167617283	0.11404957179795985	0.4705160742123709	0.1426356194754095	0.15593427264676024
117631	Diploid	Diploid	Diploid	Diploid	IKI3-synonymous_variant; YNR063W-upstream_point_variant	Diploid	0.2767914393913363	0.02307565872157954	0.2676617362630074	0.0299379164059358	0.048250266362679865	0.04724871768560271	0.21376651135191552	0.025202135427209126	0.3225534066977144	0.027071073020914358	0.4541602089136669	0.05341560011965205	0.4382480608922693	0.03165162711646025	0.452196494832925	0.03210653477909551	0.09983050276591973	0.0255068902379693	0.11629425763859386	0.03541530657797639	0.4787555541713806	0.039399845963289486	0.3612903989011565	0.02999315122052248	0.4537299847655466	0.05350836785436108	0.18637607482685806	0.05769097104971588	0.3470369568411405	0.06464481541904342	0.4965783451352019	0.04848119613523802	0.5675769012689821	0.06879061152918925	0.16743665379924325	0.10372799696048736	0.27303811671669004	0.03090528203534468	0.3246083325245671	0.05803070538691716	0.4888036336885844	0.027925899519646656	0.5200264354818197
118509	Diploid	Diploid	Diploid	Diploid	MDH2-upstream_point_variant	Diploid	0.2132186578558408	0.031467523958527435	0.3647801693398561	0.04448168773131956	0.07989131233236267	0.0730863454943101	0.14356723580260428	0.03479951057375622	0.2630897144730437	0.034135000722463615	0.3515310140413688	0.05691642458289471	0.5827956304435977	0.03558072502378387	0.3896267223109828	0.033409462000906096	0.0785839229359192	0.037913384617001146	0.0630929292101327	0.04913986032824623	0.40452922647305933	0.04931311226111028	0.2943714602340866	0.03719923347993973	0.4371650650155833	0.05927070633090975	0.4659442351704261	0.10023992359997837	0.44215074659143894	0.09126837900772077	0.6526992897783245	0.05208387508197099	0.9605294433757968	0.06998722136121951	0.1160322972325741	0.1091833722454556	0.2671465116612322	0.03959303311996474	0.22869148999419125	0.06469622275335064	0.5250082890718731	0.047965654648055855	0.4866681774970667
118921	Diploid	Diploid	Diploid	Diploid	GLN4-synonymous_variant	Diploid	0.2950235570732657	0.027069564130366798	0.2085251410759568	0.03882902984025975	0.0940534376006863	0.0591611392961046	0.3817992543068979	0.028916803536327626	0.3573985649201977	0.030115656797484357	0.5116628754516039	0.05749297186949185	0.3837058888072205	0.035452626425188614	0.4849288063378062	0.035264916253754525	0.2649720382436611	0.030467221625105158	0.2631979126944317	0.0433417401841957	0.40393503840593664	0.047191435704282934	0.499887613646485	0.0336707856957884	0.4223393420132337	0.05678761766824009	0.378967202676344	0.07485998791964821	0.3183832810704876	0.07411186270970621	0.8139835286677399	0.04963641346732511	0.8706515398350634	0.06943124329786075	0.2588094224681715	0.1086036578497305	0.309261371121797	0.03380454905087927	0.24755428335190455	0.061545445636114686	0.5994990761685547	0.03920843155776661	0.4967704346554381
119403	other	other	other	other	nan-nan	other	0.0741689299811756	0.03371467362499701	-0.015125410801225843	0.05404419801693762	-0.0022384131188850076	0.08401289154280618	0.02019441359404125	0.04337053259796676	0.07990798000332794	0.042545277725733584	0.056164252676298314	0.062150421082577886	-0.08653896693118286	0.040208631978644	-0.013491251121657015	0.03950414800278567	0.053029391349836884	0.04549657123093692	-0.07280623139219533	0.058032157359991676	0.1205517827065939	0.07196517053107143	0.09858817976298256	0.05165195833840668	0.03888275543281625	0.07305569852251945	-0.05809945868491261	0.13472938641422866	0.12011170988916064	0.13454676275269034	0.1623270875526568	0.07538280697260691	0.06302128543595005	0.10309822169402114	-0.027195593898871842	0.12492845344173585	-0.0017638524437294343	0.04400003308552634	0.03240776752853726	0.07442509135455624	0.205106817663824	0.08718453757083577	0.1663758680814524
120600	other	other	other	ExpNeutral	nan-upstream_indel_variant	ExpNeutral	-0.036759136907629365	0.04209148205392155	0.004859485725541876	0.06767550467703601	0.06193835098796952	0.10811075071098376	-0.029241086323309268	0.051591860092990965	-0.045255812762251366	0.055189117629034126	0.01808115770972972	0.0632994284151868	0.03295306637970536	0.04142994449687158	0.009698417498632565	0.03905339667113216	0.0531741016110749	0.05397646252056408	0.0039555979013976795	0.06693485595131808	-0.1318534898457235	0.09529808955703864	0.07214027764421398	0.0604797297835197	0.014390242567807462	0.08743036849530701	-0.27468520106772104	0.20587561205779525	0.3143205290638156	0.17390105585141954	0.0825451137064494	0.09058347899268963	0.34454873678736103	0.1198641957750516	0.1940975267546289	0.1265585026771836	0.032115718787326344	0.05181949201698937	0.0949247598265997	0.08348003954445905	0.2561170642019328	0.11557708283002616	0.04099453161857496
120939	Diploid	Diploid	Diploid	Diploid	None	Diploid	0.3346586211357765	0.05614943544072279	0.2828669704816935	0.08878131972726602	0.163591402510565	0.14180025855435666	0.2926469848171669	0.05445187148474066	0.4360940578934633	0.059159972133080524	0.5291284645843868	0.05529769697955483	0.2995243764782377	0.033226119341277165	0.4915200896182302	0.033953082052530566	0.21836138301308966	0.07152390961223573	0.1445302875400182	0.09233940075552696	0.6498466812461257	0.08200707424261071	0.3942095782505939	0.07514669286987101	0.24558041124739305	0.08369331084839013	0.2838816589379393	0.19035240519296884	0.6919362343351244	0.16194494531548476	0.30093591481191073	0.09957952509105007	0.5646923820832616	0.09758944116814036	-0.0893829659936718	0.19047729208419012	0.2578524065069386	0.05231299550449424	0.4222594669694255	0.08640708432090828	0.526823378496974	0.099741750487315	0.558390487581981
121650	other	other	other	other	FKS1-missense_variant; YPL257W-upstream_point_variant; SUP5-upstream_indel_variant	other	-0.051673713053427016	0.040432305300015965	0.09950204139647048	0.05995948255159895	0.07632221135866983	0.11093188319182214	-0.050697197210795665	0.05059490100359952	0.04507186739747649	0.05294485006170114	-0.014470040527366515	0.06580984666113351	0.2096398979755899	0.04517267670785291	-0.0019587861642028125	0.03867758572104145	-0.019303130591932092	0.054967467116025175	-0.02151291841527727	0.06617075687655001	-0.0013799316780318909	0.07618873895795356	-0.04359853121795172	0.05984544718128961	-0.04054345086303129	0.08544729985286235	0.08694197574102598	0.20843996552335609	0.10000846681493952	0.2129518198589412	-0.026226581664261343	0.09218929971305637	0.3533077652326713	0.11159062733486454	-0.01159973030570512	0.1435436355852413	0.06621113159276999	0.059076133625440536	-0.054808851302691086	0.0905333575737724	-0.006946844815564986	0.1459458018911353	0.08848903493674742
121806	GPB2	stop_gained	Haploid	PKA	NNF2-upstream_point_variant	GPB2	0.8816568205346462	0.018302337204646243	0.7897287278486341	0.021714485072566632	0.7826551980892723	0.03221685370908886	0.9051978571598336	0.02008981561905599	0.8113875934161259	0.02403845708264125	0.7982871463417793	0.05097794468809028	0.7373827124157889	0.02846493712944932	0.7967796575708384	0.030145081181761544	0.9060508752637844	0.01962474669712413	0.7220778176255878	0.02693913328239568	0.8279518415003194	0.031999329181952745	0.9911793932604114	0.02602696415443469	0.26015221197576943	0.05117950086589554	1.028489843616149	0.026119024921245026	1.2451112974532021	0.04912108020258433	1.1148458383811195	0.044224274398215684	1.029024894157481	0.06650144314329852	-0.5428474888542796	0.1014603251133159	0.6075718432250279	0.02866045216266955	0.7053106833500834	0.05605400811222648	0.9050647940174452	0.021645154965401082	0.9013942655457504
121915	Diploid	Diploid	Diploid	Diploid	UTP15-missense_variant	Diploid	0.09719277096830534	0.03902807986269724	0.2335045472026073	0.060387281896365975	0.1661154734880523	0.09779007952396604	0.19719228790299906	0.04284503457636222	0.1913881255382012	0.046318287950263055	0.3320873199905815	0.06327222209098662	0.294094825981864	0.04209770587302954	0.30273037114524115	0.039072023878563115	0.0857410274103968	0.049148410321996405	-0.024998407545165892	0.06686564932728496	0.17192113248714808	0.08045987949745949	0.2631221174391859	0.05184737646826424	0.234474052192692	0.07040621032984652	0.15449711152705753	0.1312965615876203	0.3489180520185891	0.12362483228740055	0.2345533780792593	0.07955431210230575	0.5054245804600166	0.08693063558408574	-0.14259795156767305	0.14238173854444433	0.08353899697309031	0.04866824870244065	0.06593623205202613	0.0758839231632646	0.27367993063552565	0.06618735274401856	0.3311561501538253
122137	Diploid	Diploid	Diploid	Diploid	YLR326W-missense_variant; YLR157W-D-frameshift_variant	Diploid	0.1945806394661784	0.02813084329726204	0.2348454021310555	0.03967171739756288	0.21554853851720795	0.05852727618560299	0.2616592614611185	0.03060837035339652	0.2840063429899746	0.030442517054573518	0.337403887367712	0.05883538542153768	0.6166096703654887	0.03719810861940728	0.4557230228730923	0.03406743442486003	0.06806955550753141	0.03303165611578958	0.1392991800494932	0.04298928496378892	0.4941847388930424	0.044219429557554035	0.3539097036643956	0.03423353466120617	0.3934927080407667	0.0566826265573305	0.3188617113036377	0.08223421310250438	0.467839475919877	0.08047473364914758	0.5093261035905142	0.05568742108086135	0.6179812196692963	0.07232497686436473	0.02232670239146916	0.11233345090245976	0.3135088082945271	0.03572692026107011	0.2343801420825695	0.06231133816042829	0.5008716305454111	0.041754542360838566	0.4787797234887492
122302	other	other	other	other	YIL169C-missense_variant	other	-0.044500192521840336	0.0437181372919721	0.09943750604824818	0.06483180853931354	-0.13813406919090376	0.12748399991258658	-0.027643195074915233	0.04883456870726362	-0.050160586785217835	0.056865870669157215	0.054338711365348326	0.06032612176719253	-0.08480030823312641	0.038295092311379335	0.0021780812545622386	0.0376225412072439	-0.02483620986156908	0.055408961750485965	-0.04278061759635622	0.0655302913148842	0.05313928807419361	0.08102762320440847	0.026918916379299544	0.061695368622932324	-0.0444803157671799	0.08645629977759275	0.33110791587320265	0.15262912031491524	0.11495703888637808	0.1747957804414597	0.0721795455722336	0.08592014042359697	0.15996358883986714	0.11845841442313852	0.21294599893745708	0.12305173261425728	0.0069960764704564615	0.049767998725547234	-0.010449473067040044	0.08094538255961108	0.005840237543936472	0.1133017488391017	-0.057087974998878924
124210	NotSequenced	NotSequenced	NotSequenced	NotSequenced	NotSequenced	NotSequenced_adaptive	0.2492605774862118	0.03037478963314608	0.32929049299950386	0.04333756599463308	0.13007648298361954	0.06918179222382337	0.2311700381585847	0.03278689696600121	0.27913786494951465	0.034045470248331426	0.4540101019231389	0.05396307236238719	0.4048021725924657	0.03215361805293992	0.4369008814682951	0.03243773465796832	0.1754473349252732	0.035265952152480844	0.0928668602971348	0.04917140498611978	0.40874657490971106	0.05152654269885324	0.3642238396113712	0.038425565204186655	0.4184134644323059	0.05937711209497733	0.317084967432895	0.10233504761230126	0.27934103155271944	0.09156409793249223	0.4994840134143356	0.056337839100146815	0.5658721716954261	0.0731895447572189	-0.06150220502603545	0.11342133111958122	0.256976424356677	0.03668536486616621	0.2963785318115424	0.06389783685225695	0.4577004115381991	0.04493681858428801	0.5106167517331286
128188	NotSequenced	NotSequenced	NotSequenced	NotSequenced	NotSequenced	NotSequenced_adaptive	0.2482408840375537	0.027411137037187	0.4121073167905907	0.03809055797037558	0.14920688952352293	0.06468412079432774	0.18073254082532564	0.031237825860890425	0.317965023394977	0.031877387128475806	0.4069479714920915	0.05701064548709455	0.476410342255924	0.035468383443150994	0.3967231669896297	0.034139606205821016	0.1221102942038321	0.03367037959166856	0.05337743615844062	0.04593276494101777	0.4712443201024844	0.045302949347496166	0.3402541789749186	0.0350540414202932	0.44306723985217494	0.05683186716444093	0.19702485710146397	0.08740600314681234	0.3899576780073195	0.08503834860130136	0.5100192859094164	0.05151096592618379	0.7551643967498356	0.07084897929495745	0.06892510536140688	0.1089973445089789	0.3264626345281484	0.03563165732423336	0.3579159077342241	0.061357440806223774	0.5586168424327279	0.03996093458116055	0.4393348569636475
129569	Diploid	Diploid	Diploid	Diploid	RPS11B-intron_variant; FAR11-missense_variant	Diploid	0.222790582355616	0.03524349296668969	0.312769887515929	0.055253257595976484	0.07623665601177705	0.09641742367019686	0.1824359503944872	0.03925604599221474	0.2418755150656589	0.04238640061584671	0.2851247978516614	0.06653172319056268	0.4184067072295056	0.04475297524930453	0.30939464660544896	0.04009196488919474	0.02763821242133397	0.04263491848977203	0.13232124616597704	0.053971749994795266	0.6058736622826255	0.051045799407630536	0.3848503189826945	0.04162752882384546	0.40193131003852256	0.062077019643949925	0.3592069833086361	0.12125423120410007	0.6095343218588553	0.1047590391301274	0.35151820836544906	0.06340440088505521	0.7149789683601178	0.07769295323460422	0.05621634503151486	0.12064599702908352	0.2644713056410574	0.0453218415904205	0.1764077522331482	0.0725141890630728	0.5330507320178971	0.04686891356075397	0.5621382758718366
132735	Diploid	Diploid	Diploid	Diploid	ZEO1-synonymous_variant	Diploid	0.28556106790331737	0.032963877673780485	0.17097649146211827	0.049761622938346	0.1206763412958361	0.08247067044537018	0.3597402140211938	0.03584341725656123	0.3208573339811601	0.035501258757894935	0.44863327607858616	0.05911002404549062	0.40618210708289204	0.03740715943489842	0.43945802262771577	0.03652709420765112	0.2785377274958411	0.03680100088144573	0.19213611135947584	0.05288286007508862	0.7276614290723473	0.05303174394890022	0.4674927741714054	0.038982189489250536	0.3852691531663763	0.060702566002914814	0.31765718727751424	0.1194912990209726	0.3533721245132345	0.09700893421423977	0.4101870348970339	0.06744684337669055	0.5730004905501711	0.07656588820145505	0.2547910093848235	0.1251854287958708	0.2938604568433094	0.03870863104273188	0.28928406718443295	0.0665414003278789	0.5465255907428866	0.052983131367069884	0.475717512705701
132805	other	other	other	other	PES4-frameshift_variant	other	-0.03449089483011936	0.037700662732120124	0.05965262353246535	0.05674635449848716	0.041054230645170775	0.09808322980893017	-0.015849916693579522	0.046497747191542205	-0.014352529056290603	0.04763817578694387	0.029947797222680463	0.06212852660681587	0.04623239387177032	0.039777049055122325	0.014812350923451591	0.03845419155293897	0.050372136160774836	0.0478003364997414	0.054300413703931516	0.05865078728816477	-0.00043764163834460277	0.0744687158933627	0.054368433103705184	0.05601719752911628	-0.04116004856707476	0.08211668157614824	0.3896379461801191	0.14108882272971168	-0.09534190357960186	0.16204973445761078	0.2459749888180844	0.07680957842081329	-0.004860913618564762	0.11664647244438943	-0.21543301068600687	0.14438195731933648	0.017727676411718102	0.04816050966223664	0.07604653234370241	0.0771108932242649	0.22761211450488314	0.09063143614465874	0.018458392104914026
134867	NotSequenced	NotSequenced	NotSequenced	NotSequenced	NotSequenced	NotSequenced_adaptive	0.16925332649402486	0.03211717069556006	0.019824894371321296	0.047164012185550164	-0.01621329166090126	0.08324265129197121	0.07233996363640759	0.034655377007111514	0.2646201825739576	0.035170765538081836	0.35854137071226644	0.059339509968151925	0.3040164977645107	0.03782549518069609	0.36436859851564735	0.03673355550259952	0.012945690659768286	0.0365280842864406	-0.01039238477014722	0.04932992638142068	0.1378429687025511	0.06106604957311191	0.21438335224784796	0.04163629612326415	0.297206876614032	0.061863783308796015	0.15766259842925093	0.11216496613480097	0.4111007615220782	0.09198267696883873	0.2518304390900372	0.06370133087513141	0.5628608629738652	0.07540564276237254	-0.07819498066170566	0.11930454054556085	0.06398629733377598	0.03974666816744082	0.08241894612103559	0.0669818498441902	0.4648454267275756	0.05037851510665657	0.4805379947724439
134904	Diploid	Diploid	Diploid	Diploid	YEL067C-upstream_point_variant	Diploid	0.1625918971362378	0.02712915817487471	0.3572760087270218	0.037374927928008166	0.16656356296661678	0.058056691981030674	0.1842723987237041	0.030059053756327545	0.24345794968803725	0.03125686124394637	0.3496755901760465	0.0571889633359185	0.5778467681515714	0.03577936510099861	0.4193993760182905	0.03347534796377795	0.20470303971571585	0.030696808293701076	0.10134437369384207	0.043117596382507	0.36623545582420464	0.044587065822128534	0.33740509783062195	0.03434817826164817	0.4154122251368839	0.05662149837756224	0.2923526466149265	0.07638699262900478	0.3537599877120124	0.07856443763275876	0.4223099860570668	0.05215096880717922	0.7659814783976938	0.07002364628104261	0.04402345177918268	0.107343280108848	0.256647326910576	0.035836489380541806	0.23304734362302906	0.061714542888080114	0.4670723429817799	0.04322263592468637	0.5055232871269366
135117	Diploid	Diploid	Diploid	Diploid	BEM2-stop_gained	Diploid	0.5008661795468591	0.02852074632668412	0.3565931238257245	0.0316269248551028	0.34769753223634325	0.042712618496806964	0.4575925354299376	0.03231324917139502	0.39403781562497175	0.03330268430713063	0.7053675957264709	0.05372285592170372	0.4920582230759691	0.030352178011254782	0.6542084829570988	0.0326766904670071	0.3996426400718684	0.030845512461268813	0.4821149525950035	0.040540937854336274	0.5259585252173556	0.05376157611501537	0.5979907010973232	0.037589737435780105	0.06069459804932974	0.06361992312623069	0.6028434769669693	0.04272391041659166	0.6550178511568624	0.05635914583409921	0.7567956025245522	0.045683015952165465	0.9456727762339608	0.0669920157287844	-0.33039130279051737	0.10537658731337587	0.4320845117939483	0.03096797357880008	0.5478315499381206	0.059079207122544136	0.5888857044239745	0.05754635052184631	0.6680335039300567
135215	Diploid	Diploid	Diploid	Diploid	YBR027C-frameshift_variant	Diploid	0.2692293321629182	0.034597577220302794	0.2991453543175112	0.05090628693530199	0.2375143795156433	0.07689961707963959	0.2145487149704935	0.037644095394027736	0.2531159738101114	0.038975444769757735	0.4791059661406827	0.05528274237112276	0.404850343671734	0.03358905514314768	0.4337370798596122	0.03351995352770725	0.11392020973711565	0.0424574244968162	0.13149089009668302	0.05614344753672918	0.2273669424117165	0.0611761181451584	0.4004274822105864	0.043790859438330366	0.4224427642486185	0.06196519556750681	0.5505954435526985	0.1259213910770799	0.3883279303387349	0.10803067352556844	0.5565936802967866	0.06436311734360235	0.7593082344355787	0.07482282800805408	0.2158459880030248	0.11348761119941113	0.2831563134885119	0.03931988112669397	0.3434642751430226	0.06706989433466849	0.591956620044209	0.04491356905177635	0.5181649571048392
142054	other	other	other	other	SUP7-upstream_indel_variant	other	-0.03441908331563185	0.033974916967529335	0.06774873335479238	0.0482662050006719	0.10143909082375416	0.08222872451896206	-0.08758613600712459	0.039925401033626594	-0.04169729952709921	0.041569363651530654	0.06493722204864127	0.06546977350567866	-0.006952302338546611	0.043546204979024346	-0.045902988716913125	0.04227324027584824	-0.04580091150923545	0.042284958091596714	0.028730976320358644	0.050304786325926235	0.06773412113308071	0.062275697700236415	-0.040976027593415	0.04850726369672332	0.146621542395963	0.06739210927494206	0.13942252286364784	0.12426920102710348	0.006432650408387452	0.15421296516275118	0.0247067742305221	0.07763978615820964	0.26814033734681897	0.09718461474998047	0.11745793455828435	0.11900591950782873	0.043429044083500776	0.04371523918252356	0.042577132604530825	0.07086088194550143	0.09918834747652283	0.07088470918567613	0.10421741539281118
142144	Diploid	Diploid	Diploid	Diploid	NDC80-synonymous_variant	Diploid	0.19542512064955825	0.02844536179604578	0.3980343050474219	0.03851247489258612	0.16352121681431486	0.06334266487995388	0.2312967776294312	0.03206330650003539	0.3270025932581745	0.03305181662757392	0.36542059096331453	0.058281369068873816	0.4952232809201714	0.03654729475073298	0.4211894869037826	0.03449311412007425	0.17805229303121145	0.03388823868421206	0.13880635799352106	0.04605116139831502	0.4195909886272616	0.04734760851901736	0.3290243504000575	0.03667666961198671	0.416358865475632	0.05818849794245672	0.2922135493846768	0.07967284711033415	0.4613286094812248	0.08278519802137622	0.5014132161283752	0.05249165146188912	0.8161376255252231	0.07085352783681989	0.11824790284415672	0.10888784192830099	0.32979270282954953	0.03622696266916277	0.2682936863028121	0.06216776270121571	0.5565223321770153	0.037940008987493536	0.4995585562817746
142859	Diploid	Diploid	Diploid	Diploid	ARR2-upstream_point_variant	Diploid	0.2474664891813813	0.03835947539934846	0.3264351221568733	0.0552943829849025	0.2267475989742783	0.0905120901770624	0.17034848414112458	0.04224322761103424	0.3093513995454117	0.04173300400643437	0.3423615433804873	0.06164590758413205	0.5647329318070705	0.040063096641803936	0.4262318000654242	0.036155151276806526	0.1835330609332203	0.04421904848256454	0.15885524076693466	0.06048328224452865	0.3181300185965913	0.0631223347174781	0.33992130322043024	0.04552341937601068	0.4313568098034881	0.06463901545860508	0.5089332971041298	0.14467841973183282	0.5706221924236909	0.10964010006879282	0.4355227861984589	0.0664640986521115	0.9873972803651991	0.07469710608886687	0.06694907079841603	0.1218155399471717	0.32528038938784576	0.046367764449917866	0.31924399185060004	0.0712838940563562	0.4870576754311727	0.053405509776671134	0.5501754605004737
143344	other	other	other	other	SSB2-synonymous_variant	other	-0.1302097278593003	0.050927833135989656	0.057965994355635	0.07773023777190924	0.05623255438621889	0.14363977792103896	-0.11361726811780645	0.0631405924774661	-0.012612137772850793	0.06197462930005222	0.10633173863120976	0.08185035603471189	0.395261881856665	0.060293459353143175	0.009320596300824591	0.044222203157805715	-0.1357995352095606	0.06342503320219392	-0.05779587310014784	0.07285577982130076	-0.1040150624769164	0.09415643487825552	-0.020672366045283632	0.06641734846271091	0.07528608887823597	0.0975189205823552	0.4876168635575808	0.1764552918205169	0.3240326281715878	0.21523529473005634	0.15572714522170714	0.09360469379648306	0.4539810638766282	0.13497744148723195	-0.3152081559397525	0.1660791539860507	0.03587944483378052	0.09595655500230192	0.12165150133501175	0.10646795072490046	0.3033031874908424	0.2270994661549177	0.4298100272341343
144535	Diploid	Diploid	Diploid	Diploid	None	Diploid	0.2671818358617133	0.0259541569738942	0.2637142831941573	0.03389846047333447	0.18232219798535407	0.05477736315567998	0.2639069189475773	0.02812747994782928	0.25102598166267936	0.03023595759247065	0.4794447886490542	0.05271089972778272	0.2971095746830537	0.030788341350067305	0.39129140729299855	0.031718338312994275	0.14958218179584626	0.029376447148491226	0.19026210955424125	0.04063951806243287	0.37026167963545503	0.045830282124686865	0.29692651223419475	0.034127460129652176	0.35504860710811104	0.056023594805321465	0.17243710025197154	0.0768786231439897	0.41332492426286105	0.06654058834701998	0.2961390877313185	0.060268167213715126	0.5491193084146184	0.07232227499074363	-0.1453467549280127	0.12985659254336462	0.2484378040260635	0.033535265645208284	0.2832665037558656	0.061096703081717475	0.4271888130990125	0.04203341708865195	0.3818324427685922
144969	NotSequenced	NotSequenced	NotSequenced	NotSequenced	NotSequenced	NotSequenced_adaptive	0.18366523610544305	0.0389778341929197	0.22123834305926848	0.061213086638351476	0.0038934037267191047	0.1115530744084529	0.18606220436806856	0.04283319189638398	0.18494219150356708	0.04622396559593213	0.3704520682512939	0.0602925950742375	0.2349621726032998	0.038872842645725735	0.2690206249663579	0.03722412898252463	0.08232212217990609	0.049723457750206236	0.057713652936042685	0.06269505558735987	-0.10785217348763587	0.08057660832215888	0.20908680563010856	0.04982518462750333	0.2749608250160634	0.07018128331393228	0.5716020006259923	0.16696948025623246	0.4162159204369896	0.14361326058944365	0.5954928376550264	0.06875267997589535	0.4665583461593485	0.08098101354723886	0.2547183393291884	0.13015057368095564	0.1121493371252626	0.04601523526530971	0.11102873610343156	0.07525118819512984	0.4468146865486976	0.060122224647344666	0.3297211069463165
145113	Diploid	Diploid	Diploid	Diploid	None	Diploid	0.3054962013759048	0.028985324322641663	0.31464064592098273	0.04178941364183812	0.10153065861265917	0.06990926884229774	0.273531914453343	0.032034140857715485	0.3183291832247687	0.033223239138298714	0.5068209693530231	0.05340408932289625	0.3525725954182897	0.031351521633546146	0.4550600867179366	0.0322879109080381	0.18070212994478366	0.03473128021403354	0.13780211768814302	0.047352099924395	0.4133267425888911	0.04980837377613935	0.44903914132721984	0.036986293421582016	0.4302734476643355	0.059334903216463016	0.3051338365184138	0.08998493988018746	0.3927004903952811	0.08829127108772904	0.5897758922281652	0.05214569598035712	0.6885113685049407	0.07160186349487213	0.22040634953370028	0.10715575653194664	0.2820091793791567	0.035070665022602594	0.29593692298528884	0.062039470731259636	0.4545121895042391	0.04332407545311378	0.4808458475410595
147119	Diploid	Diploid	Diploid	Diploid	BMT2-upstream_point_variant; SEC61-missense_variant	Diploid	0.317054884018981	0.036448823229298995	0.3623487743351633	0.05010947046475864	0.2344832537639272	0.08370985594455739	0.2801834598371744	0.03813458209245541	0.30039729791950315	0.040095943763653365	0.4843490155047321	0.0568997032227715	0.484089256141197	0.034915141257837366	0.4503113375179883	0.034321035605076385	0.0800654321327963	0.044574277498109216	0.16430111409514234	0.054202357907404346	0.43171488954990656	0.056210336410164256	0.3404067686248541	0.04398944157250365	0.4636165672954536	0.0627642824384934	0.5162957184867426	0.1103862433808207	0.5065528459031955	0.10106430729504998	0.6418756542496298	0.05670821365098624	0.8715796695930551	0.07254401800616424	0.08538709096605168	0.1161756071560708	0.2558655327701602	0.042283384467780016	0.3555839385267331	0.0672829984254286	0.5549687021403776	0.051331204794246084	0.5774441788406531
148821	Diploid	Diploid	Diploid	Diploid	None	Diploid_adaptive	0.4528145696737129	0.02361558267368822	0.5296279943350706	0.03090750788971444	0.4087948920515489	0.0390879145738971	0.4939636101184313	0.025378425288746592	0.5562386214196489	0.02758083354639647	0.6853705074655605	0.05331170425361069	0.8441246630607808	0.03066137833890331	0.7109890960560348	0.031636164722117416	0.3557665584726341	0.02621452265996689	0.2464533842916521	0.03728326898473037	0.9340486632910434	0.035598547237161084	0.6621680217518214	0.02935356166492642	0.27615271256579976	0.05379267483542227	0.7040592922175761	0.033104086149485984	1.0968365333131669	0.05060312977280567	1.3276742857349697	0.04435891479711279	1.6794715384311805	0.06651786816990334	0.2555930087372411	0.1024651442261798	0.4361108255835916	0.032216897600386984	0.479673172302465	0.05835854107460103	0.975074440985646	0.02669372805875764	0.9194384910647556
149824	Diploid	Diploid	Diploid	Diploid	None	Diploid	0.26264009737644944	0.022517544194202828	0.2382926478300095	0.029159278542032506	0.09409680811750924	0.04558163951488908	0.20598299977576934	0.024395501225367308	0.2669344821801766	0.026736314705695142	0.5186651271844395	0.054380808292375266	0.2958427527681121	0.03239708108816334	0.4598006626354133	0.0330491690223052	0.1388989059044441	0.024339959528765474	0.0761165577846751	0.03435499079562613	0.441162429107474	0.03945412239585648	0.3661769474447639	0.029797029561916082	0.3939555738640775	0.05352532876105608	0.16135245309394985	0.058260843502530635	0.33110317787405963	0.06397575312411086	0.44443602196937537	0.04798805019015704	0.6647985412790782	0.06837876863536359	0.1381865034975355	0.10302527807144496	0.25209210360562523	0.030360404621029482	0.2729146440507651	0.057761244574615886	0.4887994952422829	0.02667548805684973	0.4913154758589325
152081	Diploid	Diploid	Diploid	Diploid	tL(UAA)K-upstream_point_variant; tI,YLR232W-upstream_indel_variant	Diploid	0.2389860137844013	0.027058737194160288	0.38057943617527706	0.03666290814313438	0.25427381850029585	0.05441589494672628	0.24506623658769616	0.030526545678288136	0.3360141247866747	0.03158966626812558	0.3821836048709329	0.05664574697224476	0.6293574882048465	0.03488291669497002	0.4824575298372233	0.0331565065597736	0.2495749169157956	0.030889721635289445	0.19344628016624327	0.043511831455551375	0.4739457977368042	0.04588502108578856	0.4084468098831784	0.034017347517460814	0.3680567678588471	0.056689744373017666	0.3700481117387004	0.06533463057790237	0.4980403687314041	0.07010504381476006	0.7069257024297402	0.048245333776136136	0.9799991117298572	0.06820162439384009	0.2811566942313564	0.1049125147893092	0.27100141900220376	0.03569139618969845	0.2723877711862925	0.06164459351423598	0.5781257740240185	0.0455773388163434	0.5038464993437121
152501	Diploid	Diploid	Diploid	Diploid	WSC3-missense_variant	Diploid	0.3018273465799684	0.022877780721601657	0.25749587638884064	0.030996660013114682	0.17483049497262268	0.045194195926939226	0.27986955842291183	0.02484605793791429	0.3192519409018613	0.027120239638646317	0.5028606827465141	0.05439948799682838	0.40673113241494463	0.032361009403771936	0.5005242955523388	0.032815132449018625	0.18078210437701892	0.02524815011528227	0.132791801251935	0.03529211560710252	0.4661863309698568	0.038304874388194673	0.4549046455894905	0.029918827841726756	0.3648876105438585	0.05369792355622235	0.2072040298055864	0.05601370874506146	0.48993487795733204	0.060361507347653026	0.5560434497218137	0.04759848520802297	0.678217519811666	0.06817559793660298	0.14002120346121774	0.1035470285269344	0.281269892908506	0.03098596647526547	0.2973136641977292	0.05824465012799309	0.5051458911421242	0.031055864397945505	0.5291053473234884
154660	Diploid	Diploid	Diploid	Diploid	None	Diploid	0.2067535337547636	0.032557712105020266	0.4284519743867952	0.04541252321494619	0.2117045119787448	0.08588804345159083	0.14062160978512392	0.038475040184689314	0.3052508210512626	0.036266563695114135	0.3821497492278991	0.057930621251104965	0.572047041841003	0.03641905100837842	0.3916864726714868	0.03412562256637665	0.11852295932953008	0.041989507475585684	0.06594543513460804	0.054179464650802416	0.2736528304638985	0.057455760767575324	0.2946224820145918	0.04153502550429662	0.4296567713073768	0.06080441404249201	0.5537075764787841	0.120409736167309	0.4307898442305415	0.1036510598915628	0.4894215373938861	0.0588449382494966	0.7567004597408243	0.07406218156837235	0.07911790403707994	0.11230431240542772	0.32639834866341305	0.042981566073456864	0.2776426177051723	0.06794395067380311	0.5433130573938864	0.04344030792331121	0.4241516937628142
159038	Diploid	Diploid	Diploid	Diploid	tI,YNL034W-upstream_indel_variant; PMT1-synonymous_variant	Diploid	0.2196935623382433	0.03422231724255344	0.22664964129847265	0.0523533932497363	0.12891478083279426	0.08236692940336958	0.19095475219078328	0.03604052411299346	0.3205847387685983	0.037576534642349856	0.5115876713793432	0.0554109514429561	0.4006976604900956	0.033684480523412816	0.4228805318986445	0.033518510554925614	0.043797743544325286	0.04188052524589568	0.11019865339493663	0.05297915912695983	0.5421405727143478	0.0557447255157604	0.34313800755233353	0.0400476980200318	0.44737768808516537	0.06071024560768357	0.0386211251980835	0.11758794669660295	0.34719499902161943	0.11512963482806632	0.5782184184960741	0.058337903758880275	0.8874418568994863	0.0718211311013524	0.1276897544969117	0.11849955036292302	0.25574975256870314	0.03863234222228897	0.3396123776458116	0.06505075763567339	0.5228681679011093	0.04214619720765974	0.5092710999582853
159633	Diploid	Diploid	Diploid	Diploid	YKR012C-upstream_indel_variant; FRS2-upstream_point_variant; POM152-stop_gained	Diploid	0.2449443900557669	0.029031585542000637	0.28126744774955703	0.04224688685407152	0.06967078062357569	0.06678736229178267	0.2447830645005215	0.03194265084219413	0.2468739613575273	0.032618496112222256	0.3590020682784925	0.061978077553869165	0.5049059388713031	0.039889416094886686	0.4456560178086709	0.0370923034151008	0.16040899501847766	0.0336242465912619	0.07790021491136759	0.04713924353803562	0.5116637791113262	0.04809904546993917	0.35330118010406397	0.0365870822400257	0.4550213376959591	0.057997657334253966	0.37629065284853497	0.0920632603212969	0.33685159287758576	0.08672276819996448	0.5101192801836019	0.05636851657836465	0.8620621965258746	0.0694576642492063	0.2712049492468141	0.11353427882950158	0.2646212303275037	0.036224096350703984	0.2361517488972645	0.06279596265257682	0.5444506100650984	0.04859333251765192	0.4670286028896317
161840	Diploid	Diploid	Diploid	Diploid	YJL045W-missense_variant	Diploid	0.2577824495217277	0.03562720340266184	0.3212206298717856	0.20758574537809654	0.2409107050359879	0.0969390911904371	0.6715634851562846	0.12319302567785005	0.6895279612567387	0.12250247828455853	0.4160203164304454	0.05963155941077272	0.4465991389692238	0.03774769779748968	0.3741823637747963	0.03618974384122838	-0.00683797473923608	0.047933202144710765	0.07113589058082452	0.058951949688431975	0.5235328429455678	0.05845066499854151	0.3195631995581801	0.04454067708778267	0.3757157881703033	0.06440324742941594	0.4781997992981996	0.14448091738373545	0.5492861311638213	0.11038663899884207	0.3861888042518348	0.06535740372185497	0.7020343948547254	0.07786206369079338	-0.1157354634698421	0.12373575814523037	0.257502819251182	0.04516707127506545	0.2723178158379421	0.07025509696887977	0.5369785811134353	0.049140826497520655	0.5151098421835064
163510	Diploid	Diploid	Diploid	Diploid	VPS13-missense_variant; SUF17-upstream_point_variant	Diploid	0.17927445616323678	0.031301966039443886	0.26501515124800323	0.044115338675968216	0.276222267703375	0.06802822521290225	0.2178142599338288	0.03442955875221783	0.27028665755864395	0.03395404108578495	0.42291736229867744	0.0560770672667398	0.5459850695557619	0.034413958597545764	0.4722142578684858	0.03327057308006123	0.2065603759147512	0.03575174318647352	0.15211914513343427	0.0505758785767676	0.5368126415809457	0.05178680944573631	0.3789952649967636	0.03797143725794182	0.38487536202538497	0.05986273374186584	0.2422721670416209	0.1015217543711668	0.4494773917957965	0.08862110243989342	0.490947770590305	0.06053830856801945	0.6560593514944526	0.07342270977456941	-0.012369949005819059	0.11782065609157058	0.2759356599009455	0.03769272430584961	0.19447905784983607	0.06548785587658992	0.483786195429623	0.04716475413210591	0.5147139244050334
164130	Diploid	Diploid	Diploid	Diploid	MET32-upstream_point_variant	Diploid	0.3308762215862037	0.029408202976038893	0.26250017208019	0.04591764594430624	0.10727949640999047	0.07004033544790837	0.3135103506297468	0.032738293207596816	0.21499148316136815	0.033615687427645764	0.491313366639997	0.05572095398612348	0.3939672252297851	0.0338337083967461	0.4557102123018472	0.033832186222118935	0.14092759383593798	0.03671685047688933	0.16546936683415678	0.04897951954415607	0.5369449283889504	0.04889118317475306	0.4016657443537071	0.03802779176345123	0.4288143028849912	0.05879226909500813	0.2733646135452068	0.09052820540606897	0.32777425272278804	0.08977380454199428	0.5484424039411581	0.05982578181145254	0.6031940530971538	0.07355533455054042	0.0860798901945674	0.11871387793203825	0.2621122606021307	0.0361715236010693	0.32665141609541865	0.06368285428632722	0.5852373134568674	0.04615971477178142	0.4427930326649089
164627	other	other	other	other	YEF3-missense_variant; YGR053C-upstream_point_variant; NCL1-upstream_point_variant; SFG1-missense_variant; tE(UUC)C-upstream_indel_variant	other	-0.0014055516531706	0.04027925762551922	-0.09334275789619506	0.06569771648084527	0.03103220922131268	0.11429570476399305	-0.08624490542311436	0.05103531776883807	-0.01610771882697578	0.053481227173689874	0.009437218374746677	0.06287205184097631	-0.009000447093783925	0.040452053969135135	-0.03620266039798711	0.03896507049371865	0.027245250179600455	0.05293449839562133	-0.0025661903234437677	0.06471098405135031	-0.11878201166702335	0.08581494969340715	-0.04832328110608902	0.06417693703969764	-0.03995509315728467	0.08530711495958412	0.403768225722062	0.16412062089677162	-0.07634905304878532	0.1798838219725903	-0.12643694446180834	0.09845043765143624	0.11652789407128294	0.12003502680791388	0.12543160602740525	0.13447575736954054	0.051524835044676	0.0517162367613476	0.10264922427755567	0.07977904231444811	0.18935169480613834	0.10904796598650407	-0.046015052908567805
170554	Diploid	Diploid	Diploid	Diploid	FAT3-missense_variant; TUB2-missense_variant	Diploid	0.2691383355332946	0.026374506855301884	0.3951135822085953	0.03651059107005726	0.11474373833500492	0.06190331878607424	0.21175675236807728	0.029038752277720386	0.3341620429450837	0.03071482548082138	0.4705750595871409	0.05552825751786599	0.3992931239836432	0.03366955182933247	0.4168157273141306	0.033445204887545016	0.2268665442264064	0.0299530123227594	0.19672685130098094	0.041430667747176776	0.5123327731576294	0.044722210966640176	0.3349264866115595	0.03432247491157151	0.4012313144733169	0.05683885749473708	0.13984533028698035	0.08185353441640145	0.4466177192602959	0.07983505361462816	0.4830042642051658	0.05131731343995337	0.6321210686189793	0.07066481938541057	0.14785226955584493	0.10822700300487408	0.2627327045951593	0.03439954990560692	0.27857065646674195	0.0610270320949038	0.6293749481701754	0.034970882425880784	0.5396240565507449
170814	Diploid	Diploid	Diploid	Diploid	FRT1-missense_variant	Diploid	0.23923676915280026	0.03055776723989093	0.32110805637888395	0.043870605925039184	0.16865074102173264	0.06986883215130023	0.17623517517994866	0.03431951476498107	0.24167178783400836	0.03486131756314553	0.34117930314175005	0.0560461701306981	0.5624048435914767	0.034788937286301225	0.4274738083781289	0.032949687951119334	0.15235796450981284	0.03690606998478665	0.17963116714472954	0.04786890727459395	0.5138415154643714	0.049625357876324175	0.3575366044792035	0.03861268243596442	0.4092299665408292	0.05912562352801636	0.20573815669732795	0.10030776779588532	0.44139236276154203	0.0940106027442152	0.3656988665563973	0.059441940867362535	0.5779365801123454	0.07466852878338175	-0.09794945785716888	0.1136588959603822	0.2469079118726002	0.0378581388557949	0.25502594226408765	0.06454095490772996	0.4539572380891274	0.04833118108591468	0.5130151885422015
171083	other	other	other	other	CYC3-upstream_point_variant; PST2-upstream_point_variant	other	0.06042995065381738	0.03010290826166085	-0.14075100253979994	0.042751433783401606	-0.09945905565995394	0.07770677337564864	0.12906609875263178	0.033790993788611154	0.006559282236615108	0.03666707305767046	0.08887640047312641	0.061487572383375384	-0.10057367057127224	0.039155833154305264	0.03364324507184032	0.03969015972168656	0.00289155877108402	0.03589174778993531	-0.0017922700311182895	0.04550857902383928	-0.02459206392861973	0.059820344886076536	0.025749461144219485	0.04260913795486728	-0.07426162423334684	0.06831404789885233	-0.2025990934976847	0.11859018346957535	-0.018567699626498086	0.12468197190852692	0.05276107437825424	0.06844245618009859	-0.13607638266225586	0.09941403495851317	0.11326168413432207	0.11433314798657075	-0.035909437161273275	0.0373423967028729	0.012135753135713658	0.06576122136625369	0.06482043843805757	0.07310104822340441	0.02403202171939651
176764	Diploid	Diploid	Diploid	Diploid	BRO1-stop_gained	Diploid	0.19200127448219065	0.027058619293697732	0.3552084372514139	0.037643126459929885	0.1235784125420355	0.0650556608193992	0.19187884948753156	0.02980577221394952	0.2552191089944372	0.03142460046419362	0.392536502316745	0.057179375682769526	0.3579976963616896	0.035744202027449316	0.3460265331788472	0.03450434351241607	0.0915932498585802	0.03274712368847879	0.06487013501585145	0.044318751622190886	0.41194721553147207	0.04475252893093245	0.32880206105480564	0.03366155240270513	0.3749539929576279	0.05782925620378297	-0.042986555098243465	0.11266348728401003	0.20759051200900366	0.10288394430050864	0.2102878001430492	0.06752158440253933	0.4522818604150056	0.07940230041025806	-0.20385974976064825	0.12684316902376572	0.2637946459561027	0.03418257023668	0.2727799585219794	0.06111671409219194	0.4504333519339023	0.04017104137643957	0.4527891749670529
178096	Diploid	Diploid	Diploid	Diploid	EAR1-missense_variant	Diploid	0.30451393509579644	0.02637661637345568	0.30283518909094964	0.036071341299027566	0.12504325984331474	0.058163384961673226	0.276886814983579	0.028913686657244163	0.3233112859442093	0.030827661636315045	0.5183048621200553	0.05545220806563958	0.4253886166988938	0.03346046080703475	0.4847461972004576	0.03345829640678071	0.17258992837227882	0.030057221748887114	0.14856231537902811	0.04142247575668701	0.4866293657899327	0.04552271815244817	0.4449345082830518	0.03380015720924465	0.3670744911286783	0.056585453436102225	0.3479316207604054	0.07045115602962286	0.3652883356156448	0.07554486316569352	0.5260399889189474	0.051668279683730806	0.7353693422247185	0.07055253793784874	0.0564747074301732	0.1092403731909758	0.267505057452895	0.033315886203562836	0.3459279960618212	0.06059951342123816	0.5983258774394556	0.034348760875488334	0.5593552598758238
179100	PDE2	frameshift_variant	Haploid	PKA	TRM11-missense_variant	PDE2	0.7566783863398582	0.02144647921118201	0.7618187609102892	0.024445430205224182	0.609725679204713	0.034568069292769565	0.7948558283976315	0.02304462105351176	0.7531035562939596	0.025788222014562302	0.7363711180464482	0.053482944673130695	0.4645539257037983	0.031016038079333837	0.6903618806031742	0.03217825933424877	0.6936505675906304	0.022861879024620797	0.5519304572953609	0.033382103741844735	0.5689275608040089	0.04272491729562665	0.8200687692835561	0.029259062827067518	0.7133160500743294	0.05152726500206841	0.8267205783957806	0.03050163134226191	1.1453574174023116	0.05007450507847293	1.0227105171899402	0.044959532918256266	0.9866618641756848	0.0669849434228963	-0.4506148241060837	0.10954150305266673	0.5643858536545288	0.03147735608833383	0.5739065613806419	0.059343703265568565	0.6923204766823451	0.03102338832890602	0.7031717902039061
179213	Diploid	Diploid	Diploid	Diploid	None	Diploid	0.20396668090698555	0.02845941746196148	0.3275140129879463	0.04045659455059315	0.23902779181853726	0.06874033110090816	0.10298393355101412	0.033232266575586464	0.3105504600882487	0.031894683339398426	0.3432748328421785	0.05659955131201017	0.6370544360312279	0.035751085698123006	0.40519521975877815	0.033000095545320164	0.05493734152739372	0.036279917642747884	0.03628746571852207	0.04632643715014287	0.4611067829028424	0.048640514825926635	0.3607747048354925	0.034983826360828085	0.4224351943171177	0.05702326199623705	0.3119325373048121	0.09985144225534233	0.2378768481903344	0.09615827351862256	0.4662772541085395	0.05545868875610308	0.7563959072932689	0.07127939783350526	-0.2246184760792681	0.11220836142394673	0.2892288324072313	0.03974918185225733	0.2348209186233189	0.0653159055396228	0.5085664460839974	0.04641709375898327	0.4280007690368889
180905	Diploid	Diploid	Diploid	Diploid	RPS25B-upstream_point_variant	Diploid	0.2339442035453325	0.0267688944042021	0.385508898654747	0.035975531186978355	0.22169533438823066	0.058209033994351435	0.16967961910929805	0.03000054797089166	0.2828313696797051	0.030781115319460324	0.3546980767267485	0.05693671924449559	0.5499588534969303	0.035560627573690766	0.4099008104548929	0.033442883445877425	0.12918987097477627	0.03145907204507937	0.02771811589266844	0.043516167170442016	0.42342485586234463	0.04379542507625195	0.3217052860474525	0.03399203556042752	0.4013860058475278	0.05649414090575675	0.20059422304303626	0.07745900374619732	0.4467603505112872	0.07976233057377483	0.4901438329568498	0.05133971899643403	0.743080693058807	0.07011621818934204	0.10762948327856932	0.10687986062172468	0.3062327568554003	0.03518500036807947	0.2764788808226525	0.06119096645487889	0.5122539985651512	0.041616030332583966	0.4725334646698788
187133	NotSequenced	NotSequenced	NotSequenced	NotSequenced	NotSequenced	NotSequenced_adaptive	0.8434077598265475	0.036264838905854684	0.7862571203143621	0.04687809772133375	0.8884780134820156	0.047004023064636254	0.9638292168196616	0.039491874858914096	0.8731759163980436	0.038997310404378	0.6118909521890299	0.09135682063259516	0.9158751508810072	0.05431177071564863	0.8230847681160947	0.0492522259816379	0.9062349158465256	0.03491131505783907	0.7833660964402195	0.05355448381849133	0.5334345004942687	0.0785818553407207	0.9394196772157092	0.04364723013848037	0.06236953552962812	0.07184521532860329	1.1697158010837678	0.04346424316667875	1.1960447191591241	0.056234536353779084	1.0662307835723916	0.047239519548341116	0.9872066627256424	0.06904161439879761	-0.4167566473625304	0.14861389563636973	0.6495285851760908	0.0508771321095082	0.6198490014735316	0.07590772288214853	0.9260760835567228	0.1201291512372904	0.8893196313623745
187691	Diploid	Diploid	Diploid	Diploid	None	Diploid	0.1045036880916648	0.02756461457022489	0.3665010415196864	0.036584193167926334	0.1358649881274304	0.059818478765733075	0.2031443836643399	0.030016757341557787	0.2910588357067948	0.030336790905016012	0.2986458901250152	0.0612379831727113	0.7805097146455805	0.039632442763903535	0.44679212279177793	0.034196940582167906	0.14418258142266646	0.031035797880573757	0.10233705998326507	0.042852351017915964	0.7268295862232467	0.04467539433808679	0.3952344870262717	0.03305158040430985	0.373952152918774	0.05677616648631108	0.3568270868925333	0.07639374299123826	0.43533811246877613	0.07810965408839418	0.5311701164572169	0.05008094565521616	0.8389846329529159	0.06956445154679974	-0.037018614865022566	0.10869298613376367	0.35582120843104226	0.03844067036375561	0.1685985033656385	0.06369472006847135	0.628335695499773	0.04714101231342729	0.5779676778883189
189102	Diploid	Diploid	Diploid	Diploid	None	Diploid_adaptive	0.5328578406806416	0.0202796491265978	0.4938869848211153	0.025605008726662742	0.428436586544377	0.03487754277504182	0.4676218295078626	0.022351890264350364	0.5336049391460973	0.025353790522044988	0.7829851922138694	0.05098605446992563	0.6454390715212535	0.02860941564473076	0.6628129258393898	0.03031156162679372	0.3638411174821835	0.022283685695141872	0.2491785152348695	0.031326913509865814	0.9164298812314544	0.033313671163408616	0.6454076450719991	0.027206944454489432	0.2358411491898577	0.052180114238583784	0.7216280045081532	0.02916815874724118	1.133628467343463	0.04972973407482833	1.2387967867008818	0.04426492654370645	1.6064780562562155	0.06649429398297985	0.2515515236337956	0.1012962206452002	0.3851512025004372	0.029782499251708488	0.5478891977485836	0.05666004075571041	0.9200306827514412	0.02162716660064404	0.9161494151190556
191298	IRA1	upstream_point_variant	Haploid	PKA	None	IRA1_other	0.03925138501180468	0.05032941925975736	-0.15263094269161462	0.0910646876997783	0.18786668134350734	0.1255363198638978	-0.04097545712663549	0.06429704437851368	0.09339549937939463	0.05891092612656465	0.05651949651135794	0.06214089589339535	-0.008252037112536213	0.040495262556530014	0.05362689424473963	0.039142450870996943	0.06372365026080534	0.0648640146593659	0.03533741255862592	0.08032089115897201	-0.12247404064817513	0.10406796831425802	0.022672374313889056	0.08418323495555352	-0.12483804287674262	0.10411099393974876	0.518606637033006	0.2047334861585204	0.2706840460524351	0.21406174790817525	-0.029311418708128683	0.1209746346878772	0.0152939242907217	0.1375775667851698	-0.18442890320208732	0.17718817619133911	-0.04482036726492166	0.06213798038756629	0.02448172134633472	0.09704657817882116	-0.030652536430609507	0.14800453049252638	0.04540221432950101
192852	NotSequenced	NotSequenced	NotSequenced	NotSequenced	NotSequenced	NotSequenced	-0.017581704426281528	0.043832922654993736	-0.06392515170134846	0.08413885798921421	0.03871114493556127	0.12911995947750685	-0.12849818126054702	0.05425707823128574	-0.037191239109559786	0.06768927939868505	0.12978686114161256	0.064709488573215	0.008646444997351779	0.04282819923401216	0.07366337193142443	0.04234549129981924	0.032768592902288673	0.0536856418826016	-0.08207841641853818	0.06433414371401577	0.05807503927139314	0.0779802972844492	-0.009421140089879987	0.0610548076203948	0.07264816736641078	0.07793487189572353	0.40481669110531343	0.19020365963758432	0.4765509770848333	0.1652814765982918	-0.055135008116576234	0.1001644688040886	-0.0125932611889909	0.12061868125701215	-0.2659768313665474	0.15194179097340868	-0.010146880908097242	0.0547582823400457	0.05227914461632039	0.08536869073032592	0.26848717868955035	0.08734293972669192	0.21647256111759894
193269	NotSequenced	NotSequenced	NotSequenced	NotSequenced	NotSequenced	NotSequenced_adaptive	0.12429248157683664	0.031121538248405294	0.1191693526789682	0.04578249751855495	0.028181309211346938	0.07714893328607604	0.1174425697508638	0.03357749766034185	0.11416495797424064	0.035248430901270916	0.3623693351044577	0.06342796865451128	0.2855998145427376	0.04174511924783707	0.3161840536243171	0.03902682852428326	-0.015661835783735333	0.03639099866246622	-0.0431946927061728	0.048666023479604976	0.18685005085699288	0.05672612569929756	0.14782279749900415	0.04062741505952492	0.288484031362278	0.06087439653015018	0.3328148226444575	0.1077181179729988	0.3785832955991001	0.10442229531817417	0.2863605005999396	0.06868871255403923	0.4004775964808563	0.07945095294858857	-0.0767823062968497	0.11785687402724812	0.06454292738199739	0.03912954252464718	0.12955025936312115	0.06678228835550505	0.4781123336995751	0.04398868495293883	0.3832068368110231
194622	Diploid	Diploid	Diploid	Diploid	None	Diploid	0.2507664813037587	0.024225067446514027	0.37714651917375897	0.03247568745894207	0.12933636712558866	0.05355352150083658	0.2164039240229048	0.02771840035049843	0.27442383437421225	0.029242511076065094	0.43764617902450004	0.053221675262508115	0.3589380792328944	0.031407186648642324	0.3717840745257773	0.031980760717065834	0.1649007473205699	0.02874194184212658	0.11882292931694716	0.03984893996261853	0.4711956569908889	0.0422235798368152	0.3695935982406528	0.032032323888936336	0.35574561952209816	0.05573907662067543	0.19558379794717726	0.06773293765653747	0.4771405123144234	0.06946687730365989	0.467455892628887	0.05016816261359525	0.6752179809078531	0.06947811833786856	-0.020867817272245712	0.10672534606900468	0.2434687320841279	0.032896342326914685	0.2630407682818863	0.059756099401351785	0.52812249464188	0.03355887361157312	0.4651350545812008
195473	other	other	other	other	RML2-upstream_point_variant; VRG4-upstream_indel_variant	other	0.011420924970223324	0.041606206869339184	-0.09573577222118257	0.0667290420216498	0.01970698609393387	0.1174695877950357	-0.0923251464286595	0.050305602966427054	0.01842961900343791	0.053765194610803056	-0.002653567725309699	0.06805175350506068	-0.01204382652510061	0.046247037748957685	-0.03127352837743575	0.04300280546803025	-0.03955014135805444	0.0560969897771726	-0.004486070931687762	0.06696996793116188	0.16044101578409686	0.07169835906685865	-0.059889686681800974	0.06420180811329818	-0.048356410586358506	0.08263602321567239	-0.033669894582503385	0.16180330319689015	0.08441233709029633	0.17901854381866364	0.014726690334131062	0.09586136682946096	-0.062288985187383274	0.12882417411696692	0.12136679957678942	0.13444865062800215	0.05759107446881195	0.050787683387312224	-0.08371844717539548	0.08430486523036396	-0.0022356665215622906	0.09991782424280647	0.1247488119060279
195887	other	other	other	other	RTT102-missense_variant; PBP1-missense_variant; HSX1-upstream_indel_variant	other	-0.015178372457679171	0.042573224641645084	-0.024794239905871568	0.06659381744222723	-0.011138595525886294	0.12210929451068298	0.07354975192431132	0.04951718928824357	0.039384540109193	0.051288962871030574	0.03492133362064417	0.06355606907833522	0.0452356376722575	0.03994457916435505	0.06010020541141992	0.03987192416426144	-0.030089946841446075	0.05734025303307246	0.08758029427471467	0.06552060108513058	-0.1768567126481017	0.09201254635750393	0.005118955998158476	0.06383520275717255	-0.03499978199438447	0.08607693078912841	-0.14234791154817272	0.1790429224293288	0.06556495181643125	0.1756954944540166	0.107073677625944	0.09505155000439804	-0.07240481395713337	0.13063404065170856	0.0818566572236887	0.14168205554633334	-0.0038267891229215906	0.054605508430567114	0.0726883093923008	0.08504018469546516	0.08510854546475616	0.13671058569890113	-0.08180548683916211
197765	Diploid	Diploid	Diploid	Diploid	PSP1-synonymous_variant; YDR134C-upstream_indel_variant	Diploid	0.18612500525619374	0.03132945031113096	0.18268387646974055	0.047098841014740885	0.05038924676106963	0.07682756989318328	0.21575609941333293	0.03481471077919943	0.26268962345929603	0.03728316453017549	0.4739539734594053	0.05428890706525853	0.33431705674778417	0.032317288584188794	0.4080092204199127	0.03289375280627705	0.06611697904243524	0.03813793937615959	0.0781824524899974	0.05052332620357509	0.2351924656038204	0.054180961825626366	0.2900014609623376	0.04194594133136994	0.3635055082930268	0.061570053617700626	0.26913159453142915	0.10202246225595206	0.3958290587604872	0.09639444500122317	0.3335621993181991	0.059616949284836074	0.5712355029564754	0.07490751583065414	0.0654905417503102	0.11465574064538063	0.16396234769370874	0.03777595188346496	0.254822489038277	0.06529214638967129	0.508215741604631	0.046006866330780126	0.4860133756155779
198950	Diploid	Diploid	Diploid	Diploid	DSD1-missense_variant	Diploid	0.26754962741541377	0.02760171356883184	0.4042287763874154	0.03862248685856277	0.19384801952109507	0.06364576111311243	0.2600170322895368	0.03064358885845933	0.2988404284815431	0.03284257710793263	0.4755634846987279	0.05530099667955955	0.3537852473033561	0.03342126293430498	0.4121200143247817	0.033338324821157984	0.18084852966191034	0.032326476776484946	0.14257655745285092	0.04496829827061608	0.3811489912829799	0.04891243514372051	0.3831634426542955	0.0356369053114074	0.4003389812041892	0.05785540244423204	0.2095800463743029	0.08626580733016036	0.4143797701734399	0.08520619223865207	0.4129326610563007	0.05359334784988777	0.6839284669727901	0.07097355275813476	0.12996779735920064	0.10905845723870644	0.2663110551425377	0.03478464953593415	0.3123543193366441	0.06110547154025237	0.5514280859520335	0.034863910879243135	0.529850521410356
200512	Diploid	Diploid	Diploid	Diploid	None	Diploid	0.19989119710174025	0.026692352305655687	0.3731676059836237	0.0355476694015001	0.13027026478915155	0.0597962706274043	0.17251860191982107	0.029274036267042086	0.3235200565155429	0.030871378680078027	0.3701408041085039	0.056179389394596616	0.4842167456459978	0.03471750564684472	0.4015549126712138	0.03363951703597668	0.1363275401093344	0.031262034640062435	0.13885644709412956	0.042314708325132656	0.4258417891599269	0.044757402554434216	0.3237548659669868	0.03431137101165421	0.4271685016926942	0.05617100599604519	0.35821810972213985	0.07551064796198327	0.3718381276829795	0.08072317287582413	0.5870777667298989	0.05031647544339945	0.9127253213904536	0.06892943016602372	0.01987242003666765	0.10775566503767718	0.2758475970346113	0.0343027191408562	0.2814894240698074	0.06045883031594276	0.4513170765302824	0.03964858306917108	0.4310071713278916
201777	Diploid	Diploid	Diploid	Diploid	DOG1-upstream_point_variant; LOT5-upstream_point_variant	Diploid	0.25777696222514285	0.02421136975162389	0.41382557413290216	0.03296790654867617	0.2623771365307199	0.049342415655975164	0.2360098371855281	0.0270437032085174	0.30378229895725284	0.02923308768411176	0.4785711357960872	0.05475237779369286	0.3982113533217538	0.03300284915339926	0.4300731803916515	0.03295944185655967	0.15730281480481434	0.028149576244166943	0.11191237817524982	0.03829562914428243	0.4120799336306248	0.040961460686022085	0.4049470473826595	0.03217913408063057	0.3850558551433589	0.0548795017578446	0.25050581741593586	0.0642226946977657	0.5244972079976895	0.06663276834817075	0.5271005966768497	0.049028348844638525	0.7120211839597569	0.06945352101592774	0.08713876733603149	0.10534489101200688	0.26743188848861105	0.03313125622095523	0.3427584067038538	0.059659106927485814	0.5553514672884186	0.03359729307535941	0.4695275635888835
201919	NotSequenced	NotSequenced	NotSequenced	NotSequenced	NotSequenced	NotSequenced_adaptive	0.2753834358306827	0.032930214714407734	0.3172146885137076	0.04996405942825837	0.18944591592333507	0.0946317711096061	0.0689989773790439	0.041395062374517684	0.2636145167164209	0.036821381075477416	0.4145411108457164	0.054061336557605005	0.4806543553615928	0.03273651789518535	0.4025203939361783	0.03250015884831403	0.035270452078614206	0.0431594741987956	0.05514462604629713	0.05406424198472458	0.2488608625890712	0.05674578090706486	0.2707778576703684	0.04054014381089269	0.4877327253455698	0.060741478365810925	0.5325979795247785	0.12070936034530905	0.5413202421964107	0.10635386086294447	0.40723393201478	0.0616718369511436	0.7255101650789813	0.07597711355024668	-0.041167704818896186	0.1158706702988126	0.2700334729237646	0.0455651555291689	0.1603634722249595	0.0693422849770358	0.515640419878955	0.042754999397165816	0.511416649091157
202468	Diploid	Diploid	Diploid	Diploid	None	Diploid	0.22495491718201246	0.026768413694205764	0.20961834957137504	0.03605238534478007	0.12914839596686672	0.05748464112456295	0.17825665391521714	0.02810147576391597	0.2636532681035296	0.02943728117482384	0.391070637244466	0.05801009764169871	0.5255373510658529	0.036737600720589896	0.4578451274572949	0.0350141261929693	0.07568872358333015	0.029302300193129908	0.06840147936591719	0.040361329648561525	0.5895149801192607	0.043641329974832895	0.3392379259767971	0.03287912122480585	0.414909899008931	0.05539412691018	0.08388429397028102	0.08079383512350631	0.4560863266664047	0.07491729818447712	1.0996032320705318	0.048307311504466925	1.3910275222752122	0.06733430881611062	0.30305204757139154	0.10750037139406204	0.2440280252390743	0.03406860088055343	0.24903499160464976	0.060799625741369726	0.4522651059578522	0.038685706994917884	0.4292202898903735
205157	other	other	other	other	nan-nan	other	-0.007243599436055239	0.04151463469514224	0.04085606179756353	0.06264581578385782	0.1521704019389445	0.11355408492866732	-0.001630146072749638	0.04865907116429415	-0.01700470326547825	0.05348618928702717	0.013276058058650791	0.061845504799988536	0.1194813339154076	0.040079834639448066	0.007602363162391319	0.03802385680980326	-0.07813487660873895	0.05384599432615152	-0.06533954935544457	0.06509988133643438	0.1533817134781178	0.07057538366045663	-0.0049732147115278715	0.06290427609709498	-0.008582885580471301	0.08660181305871592	0.1575165351073124	0.1697530494899123	0.08991596921258843	0.1886150972095353	0.059418241015272974	0.0982780338655723	0.21680925623915465	0.109845425129772	-0.21555173047107545	0.14189824623563435	0.04805697086139722	0.05460467911588434	-0.07502870872085421	0.08614573069295678	0.11311310813869994	0.13637113990714947	0.08563468137657433
206713	Diploid	Diploid	Diploid	Diploid	None	Diploid	0.2845791510531777	0.0529436536456837	0.34926545134767795	0.07359959609313557	0.24506475379958825	0.131917992494259	0.3011580022146604	0.05763807830289951	0.34529508158633776	0.060784012489023626	0.4381547457800767	0.05557431203659157	0.4432863504354416	0.03364668030582176	0.4031136373909649	0.033231673176642273	0.1428822272939024	0.06503661748270838	-0.00786596120183727	0.08912825158054458	0.4142595931512692	0.08755345120702179	0.3116411143012899	0.0675419054805739	0.4011441765713527	0.07695246912401353	0.3779269348473528	0.1886139046356461	0.5932326231075811	0.1751186449790137	0.5216363323713873	0.08405007324531011	0.6299268561381581	0.08684388867756115	0.04778846797185643	0.15162314758213993	0.2452897008473955	0.05537407026474271	0.3679158441907344	0.08125899301273291	0.5759029690593563	0.07837466060959022	0.4146320787114449
207058	Diploid	Diploid	Diploid	Diploid	YGR174W-A-upstream_point_variant; INP53-missense_variant	Diploid	0.23608576979119936	0.025665105234943586	0.2819313737758297	0.035512121198650035	0.15672302682830666	0.05326493151542483	0.2964292317062449	0.0278730055894629	0.2797889165381981	0.029082372223083536	0.4195263329703651	0.05639397274198803	0.4748317086970935	0.034829215037416365	0.4351897401242934	0.033892078111725864	0.17505003623011914	0.02855467083729824	0.23270372091372096	0.03904733541859223	0.6784002179653779	0.042048294642661334	0.38250811183844696	0.031943384768630685	0.4080626806933538	0.05543995187047746	0.2326362056469853	0.06766339152814041	0.3279694901285317	0.07221718559526354	0.4359291599593329	0.05230771696179128	0.7282353896614225	0.06945506457478166	0.0924954498166702	0.1073068651872022	0.2578939051676004	0.032818476928784625	0.2510593326443967	0.06036258072804215	0.5125075877771724	0.03766211387864395	0.5373573215785128
208465	other	other	other	other	CHS3-missense_variant	other	0.024652552570920683	0.03424334735367393	0.018183076919815168	0.05063410165058202	-0.0456119029524683	0.0863355266865652	0.006005452115915131	0.04148593973536238	-0.03298121490248907	0.04216562303760188	-0.016416813707997645	0.0610060206392861	0.037915908412948215	0.03894920528196028	-0.0003012946220171353	0.037553680211683566	0.00358091303212709	0.043494723343606906	-0.022007071912856703	0.055367789483593666	-0.03279710908197226	0.06759437108333845	-0.053806742934716725	0.051714565191616345	-0.022929400152055995	0.07106265025024515	0.3057859789968297	0.11691067598759695	-0.0821785038616408	0.14077244627350405	0.03287918643136842	0.07544897958329518	0.2271359290339767	0.09651116785027034	-0.1835056092599236	0.13084727475183505	0.01088348628304705	0.04374994699860553	0.005583578398056161	0.07395789778795905	0.23084368341156725	0.08476258711999574	0.029258565334331563
210734	Diploid	Diploid	Diploid	Diploid	YLR419W-missense_variant	Diploid	0.12310044093400525	0.036082686963829866	0.4121365933476753	0.050156880085542435	0.1978177804242624	0.08622984023279599	0.1441231038454124	0.0385656051470717	0.29322441884713674	0.03847129811016986	0.31698737129585075	0.06658988754639797	0.6769457026524937	0.043871935448847404	0.43029740933383204	0.03739403063438598	0.0812612666569937	0.04368066823360839	0.13193185579282016	0.05472647022822846	0.5734334236561744	0.05347723213122418	0.2987837699102812	0.04371158078328456	0.3773932184417404	0.06169928192794316	0.4654312936789862	0.12896486180518513	0.3813145224758385	0.12503977138516928	0.6232998222156837	0.061542512284624	0.8192695790371722	0.07504084532326337	-0.10128565538273424	0.1274746781464954	0.3316911405214729	0.0462460359827736	0.18821750299936169	0.07136892045145535	0.5070449830126701	0.04760569963638366	0.4928467187015506
211106	Diploid	Diploid	Diploid	Diploid	POP1-missense_variant; FUN19-frameshift_variant	Diploid	0.3132627880322846	0.02747823837065332	0.3984679408339111	0.03683646066210816	0.12954076545952006	0.0597918042823245	0.29990933918596396	0.030129132976508342	0.32060270586448725	0.03225532236878356	0.5221833278852048	0.054378955633102015	0.4672020284387801	0.032292642995291665	0.4949918956180523	0.03258670145036492	0.2349289499928649	0.031858391666587466	0.06597751050206432	0.04574213452323405	0.4695177923213591	0.04711383412455568	0.39393185301675787	0.03591642583688471	0.3467568364620782	0.05752975219721367	0.3041374128179	0.0711610316256074	0.5414445109097529	0.07152930630534693	0.7284420261230922	0.04805834684835044	0.954722519856628	0.06801733156875538	0.2689319001250873	0.1054791697973156	0.2820908240786415	0.033977437285467794	0.3470903698471605	0.06072324540034415	0.5967785256170678	0.03487974043112499	0.5929706359086565
214211	Diploid	Diploid	Diploid	Diploid	None	Diploid	0.21373227910031276	0.02629178922045264	0.3616762546677357	0.037460856577298765	0.12680671764386695	0.0601872518000994	0.15421710633720098	0.030677390181377544	0.2947122005691786	0.030650076208181307	0.37610045215527377	0.05542465045832986	0.5200712351143606	0.034253182633890544	0.3642049890241117	0.03280816196562685	0.08886860984197699	0.032438310458452004	0.1430599781578012	0.042642934501390437	0.38519968623519607	0.04400191031932775	0.3262599414306345	0.03432402343788255	0.43091420693754573	0.056155697741392514	0.30979175039022033	0.0773070906326727	0.5363060510522913	0.07637678943072354	0.4214563453124899	0.05149224838422582	0.7997935638561645	0.07009961470872253	-0.02252954488176662	0.10803326960443653	0.30697043391376616	0.0355648748710323	0.2291188940480689	0.06204823590816583	0.4927415936846876	0.03399981504533983	0.5130513560475101
215309	NotSequenced	NotSequenced	NotSequenced	NotSequenced	NotSequenced	NotSequenced_adaptive	0.14738663356028325	0.030551309151777305	0.06306693888149094	0.04629062827473261	-0.054090475443580116	0.07073008224156649	0.21705751306566626	0.03313342327690252	0.2951261418748008	0.03394948983296533	0.34556283414719274	0.06249938619603612	0.2876261029854251	0.04129279281320434	0.3610683472072853	0.03858031673647787	0.11418848486353718	0.03522388862941881	0.22962857918694046	0.04651029463236225	0.3853236481401589	0.05378436844735302	0.36888068982166977	0.039219682756579666	0.2923610492869912	0.05996164471609641	0.07891727097483091	0.0941655009184256	0.18505540676290305	0.08656179026291194	0.34890976176048083	0.060857885616338425	0.3940380566301313	0.07704198540934525	-0.15747688762562073	0.1189994679705306	0.09767326890979816	0.03752127490371916	0.10975485080022873	0.06581435013923895	0.4548077725588205	0.04283549628174721	0.4308696522110998
215325	Diploid	Diploid	Diploid	Diploid	None	Diploid	0.2656110759326599	0.031873403081951746	0.33572297805541723	0.04743563021763104	0.23106456775788956	0.08159528034994094	0.15926832045838465	0.035487538939064894	0.2750085009630964	0.036676704463970713	0.4472576753649874	0.054866716319105474	0.3852820684384315	0.033127475489670516	0.3924037945006224	0.03305522679874446	0.11404716579120848	0.03913049746666592	0.10274903172837684	0.05151037417938334	0.5761481170918596	0.052998856831121766	0.29809889472937706	0.041295456093319916	0.3416330812796666	0.06308815890508898	0.25590842587697715	0.12698625012014256	0.3302823459709354	0.1104469433361018	0.3801615215490986	0.05831594057063761	0.5908653994349017	0.07602133061721912	0.23932646121897	0.11028522289179446	0.2854690746916037	0.03900612557369251	0.28307284091571394	0.06565746098300268	0.5762143435520328	0.045945018058104886	0.4563309428814925
217798	GPB1	missense_variant	Haploid	PKA	tL-upstream_indel_variant; HOM6-upstream_point_variant; DFM1-synonymous_variant; tA,MRPL3-upstream_indel_variant	GPB1	0.40803269156625743	0.023537412029649873	0.32993734113598205	0.03035970690262192	0.2991412198809518	0.04321498404928407	0.4967309998465544	0.02666482133473894	0.3841270281968183	0.02802829034813401	0.3889189826157284	0.0558066551810247	0.3226128423648871	0.033757676196317365	0.3322124055612809	0.0336521390877408	0.36073751980614377	0.026045052396937926	0.2770679978120258	0.03682670281452271	0.4256681680093578	0.0445095477162356	0.4080707024933075	0.032163823622158784	0.2916603722742968	0.05498186466793485	0.34809377066166736	0.052156139054311886	0.41306010063418985	0.06095892500191119	0.3819088560978605	0.0547892818440045	0.2995335046563369	0.07790124201721071	0.11085316646633757	0.11139438847561438	0.3676668707712744	0.03249280386333478	0.38118965948182615	0.060064048917457626	0.3692171316457946	0.043999885644384784	0.2770921627880468
225065	Diploid	Diploid	Diploid	Diploid	None	Diploid	0.25591701818137763	0.02429974077252509	0.2538399939131267	0.03214386173655925	0.1238560878301044	0.05061489814558216	0.21639505340070767	0.026636492660212386	0.3010414346608209	0.028848078004375013	0.4759988740776121	0.0537999583977417	0.364373011922169	0.031800866153879524	0.4161486302186978	0.0323153022865783	0.11401352170982433	0.027603955158817986	0.166056389785506	0.037363285390537966	0.2957656027966572	0.04329774477602204	0.3479739291081099	0.03162609857508244	0.3407237791497068	0.05495984047261194	0.18862506954503705	0.06736864407858753	0.3302604038827303	0.07140288144376768	0.4265906897042319	0.05228295391792885	0.5400308221976283	0.07105648904855362	-0.1018201194702747	0.11375941756227514	0.20636164260174653	0.032077107566860594	0.2829924282673454	0.059067660681303785	0.5308601322968862	0.030979258208595737	0.5093253038668153
225923	NotSequenced	NotSequenced	NotSequenced	NotSequenced	NotSequenced	NotSequenced	-0.003934429523326929	0.068239408485598	0.11268056362563485	0.1002931948317392	0.4554414528875097	0.15519480011445205	-0.065921317385064	0.08884143139737913	0.0124801733198658	0.0941650542611678	0.024502868675221418	0.060487193551866734	0.018800219535290597	0.03867009394925332	-0.01360273750493145	0.03741363351321121	0.15524423288399122	0.08577950627311633	0.2834247201420214	0.09797372777089683	0.19951745752959946	0.12681473390101872	-0.07477333525535945	0.1080134557922412	0.22157157716421624	0.1175254211127666	0.03877761953085551	0.2997291720494157	0.3177460525029148	0.2820573476785824	0.2800031785658691	0.14327550845800907	-0.1428293247840349	0.2261780114379072	0.08597747406066901	0.21216630658349492	-0.07779625688297666	0.08369741355339788	0.16341504691706013	0.11300064142709401	0.5542680709284503	0.171409161844116	0.4602230316710702
229920	CYR1	missense_variant	Haploid	PKA	tR,-upstream_indel_variant; FOX2-frameshift_variant	CYR1	0.8850141317934928	0.020053031769446044	0.8438477574676422	0.022985073581144964	0.8491791635111436	0.033066332896369684	0.8251441076620781	0.022126017887370324	0.9229121199975642	0.024924059053908768	0.8064957752699881	0.05303865136166578	0.8659879837377548	0.030843521916837573	0.8636914911661294	0.03125683035669724	0.8258381377434469	0.0211825173339279	0.6798123201701186	0.029768899026185867	0.7200718745914163	0.04021470049685002	0.956695438859138	0.0275253721095289	0.7230844813413612	0.05145521672309596	0.9613126114173732	0.02770127774827436	0.9290695004594524	0.050289678236393694	0.7995979556915022	0.04498392915729818	0.6551798435708722	0.06840421912017794	-0.7668422154103168	0.1325471571276116	0.6964942113545411	0.030802742392277718	0.7142069437644409	0.05770692474768406	0.849866632360251	0.032352858235971324	0.7592033384008153
230962	other	other	other	other	nan-nan	other	0.0759518396884877	0.038407356405285205	0.13051927932901866	0.056554359440186434	0.016462570673988566	0.1046776734567293	0.08072147886927904	0.04651352195853714	0.06040561636866582	0.04830894258400309	0.06634002786180147	0.062083191415904015	-0.02593369089341259	0.040138155988612666	0.018492620291808905	0.03893806720686378	0.18643236847153274	0.04534454898087382	0.0915195815202506	0.062185867566186576	-0.02098836815328246	0.0781781126117615	-0.053988446900661125	0.06125858289469958	-0.0017052603660050445	0.08215609404872005	0.14908183200725664	0.15670213121452206	0.2370311855668838	0.17213668918829866	0.17501105193404962	0.0916098327808378	0.24595414287158415	0.10687700916669698	0.022068592736615336	0.14299218171282035	0.0358089488204953	0.048291707291661864	-0.04339797026958087	0.08169121949513906	0.13791809921982914	0.11020942983561237	0.03625856501359526
232264	Diploid	Diploid	Diploid	Diploid	None	Diploid	0.2545407340588666	0.025419976743058858	0.3522528873717393	0.035174759596987404	0.14686628334649565	0.05625852243481848	0.2042470646963282	0.028346392425147474	0.2670499232124489	0.030104720826798038	0.4341257274392685	0.054122473421832636	0.4041555597992901	0.032433769991739664	0.4361178354264145	0.03256896208134219	0.14685579860718687	0.0291347066503206	0.1258460751984305	0.039860992712034825	0.33855717766121346	0.04341343138728662	0.3739098096822368	0.03267448138378772	0.3687225841578493	0.05577064720834268	0.2948881447769444	0.07312880139606251	0.4367200112593703	0.07526517767085683	0.4461030784860395	0.05169277321695751	0.7100255704195112	0.07010113802262694	0.06420744993433837	0.10747068926159097	0.2867685297371813	0.03311462452823369	0.30939218219376163	0.05973558070311236	0.51096485909328	0.03507668285874185	0.4721431104038382
237576	Diploid	Diploid	Diploid	Diploid	None	Diploid	0.2624009584434361	0.02669873265204312	0.3613503950000685	0.037913185155574514	0.1279227350394683	0.06170426163151066	0.23428887897228184	0.029896278404223812	0.2421196871365465	0.03134655061556583	0.4645266498859297	0.05490193603234948	0.3943864774040573	0.03304888939238375	0.4254322228167716	0.0331366122355476	0.19276372127164	0.03083085359987102	0.1274097177771345	0.04307271684293831	0.4501212926217426	0.04459377440017488	0.37770460093558295	0.0341514636327532	0.3980303818511433	0.057455315000205814	0.11727619838903862	0.08801392723032632	0.3207416642594019	0.0854557444611821	0.4499060427846661	0.05305101258615445	0.5776758013872845	0.07136815251886311	-0.04581637046136351	0.11114982181416748	0.2505167647575753	0.034284519080783116	0.2699885265587647	0.060971360114556686	0.4732379524568962	0.03576782584600298	0.5173081902688912
238413	other	other	other	other	nan-nan	other	-0.03462702847997133	0.0343340302522272	-0.02479667433154167	0.0505617401840981	0.035435285384218806	0.08319959605737293	0.06983854874690204	0.03851346792935273	-0.01817310857630324	0.043228038394260544	0.01246176254999838	0.06441404213187857	0.057140635521341264	0.042824727349907485	0.034109699633484064	0.04005667605174188	0.020908220117763388	0.044310253952404184	0.07329892221693354	0.05260319994158022	-0.016320577825783642	0.0676806393531867	0.02977486838565482	0.04970101102745842	-0.018050143087318515	0.07264056272538047	0.011686403469695706	0.12592662239959707	-0.051610386490672434	0.14851965782810228	0.07037742631763043	0.07441113348314889	0.17483676857822356	0.09710742416885174	-0.1263763424295247	0.11961033320078936	0.008643313631843367	0.043185314117172975	-0.015944185842457482	0.07243178608720499	0.023327534015786463	0.11237823345918706	-0.13828613845487986
241857	other	other	other	other	YLL066W-B-frameshift_variant	other	-0.012505985019634371	0.04281566626878377	-0.13842628425034784	0.06575668600798931	-0.07713197495859718	0.11603930760497118	0.09749169722435494	0.04778294043996596	0.06867771160090358	0.05434797445266132	0.07214125506289285	0.061431680553935886	-0.0625022926586204	0.04001749604464222	0.056324223271280976	0.03896148149326858	0.15634260415016482	0.05239727559556437	0.11101679301305173	0.0637151657577392	-0.0031855424689434023	0.09194324773076032	-0.01579617149522879	0.06625207640426875	-0.025653152719738427	0.08213938978870032	-0.04415894039364197	0.18113122294882872	0.19858654582702095	0.1817095016508561	-0.00480743810219385	0.10437324810057147	0.04904847058116784	0.12612880057668072	0.2157381993081032	0.1294284794579306	-0.04192610878650747	0.04859806920115669	0.03305095193175407	0.08259505259687126	-0.02269687281257557	0.1342525088377741	0.046316958198952034
244443	Diploid	Diploid	Diploid	Diploid	None	Diploid	0.19361353052391464	0.025050683983209282	0.2833856885934864	0.034567200012477935	0.13232618322419376	0.05609427966322589	0.1927050181621683	0.02749016754313624	0.2780222441655647	0.029588505429501987	0.3743394086139786	0.05563586575037743	0.4592532862719469	0.03451336370944883	0.39368412656982027	0.03304948079440403	0.1309106607841529	0.028719132959757487	0.10212017823113834	0.03950038352189289	0.3076158714967181	0.04334118597668389	0.3927910004041911	0.03256526180116162	0.3420673243190343	0.055951495191554165	0.07567160657651174	0.07522928406029279	0.3053810588027425	0.07672508048160212	0.41652896308514303	0.05352234436039025	0.6129879329776079	0.07087084690229209	0.012582657781623116	0.10707504924020822	0.242473032729324	0.034109464087742195	0.20698139331502052	0.060372898861037486	0.5106213509763232	0.037464129132754515	0.478566096936629
246829	NotSequenced	NotSequenced	NotSequenced	NotSequenced	NotSequenced	NotSequenced_adaptive	0.7066084284568664	0.03435142399060602	0.8020324962657929	0.04021974940677444	0.8586293504858059	0.043983034754919284	0.8612463884346343	0.03939433239544048	0.8850491870559376	0.0373824438859431	0.5519086903584971	0.09089664637684212	1.1490025967290238	0.05216688902645331	0.876618665279765	0.04422586419887708	0.9890421624040832	0.032561915949481594	0.792831497709606	0.04827780907249235	0.64449536788188	0.07010905797275074	0.901701623131572	0.0400340512966915	0.1871047019850743	0.06541645696844464	1.1239018283581044	0.03924334696989612	1.1906499647948137	0.05544057034516037	1.144711113592897	0.04667022771075351	1.1074233542630068	0.06904897506916105	-0.5900074314098226	0.1393338482376347	0.7139042649324211	0.05197648958223764	0.6631167196617052	0.07636275880771158	1.0408608505219787	0.13135812733443689	0.7822555075030408
247616	other	other	other	other	FYV10-upstream_indel_variant	other	-0.012527993710801271	0.03473828342175035	-0.05230211391625442	0.05005515404272301	0.07755238677109971	0.08219167804491656	0.014271502846342116	0.0391875070258166	-0.06105669538461291	0.043384216257147265	-0.0809833196467877	0.06458969354489698	0.061467042895987686	0.043357082006188236	0.006943294740359037	0.03934897206242178	-0.032665213580326403	0.0422708767241152	0.10864031659793527	0.04976318929800223	-0.03129078222579552	0.06957962342085837	0.010908249268570357	0.051454619629462385	0.08026745049270992	0.06920345563274392	0.2764696077971112	0.12065987321917587	-0.13415361063755468	0.15585956858618694	0.20712896349074109	0.07472388298339892	-0.02059706765457257	0.1057542393494883	0.07632713121048416	0.12265471545333145	0.02009724737207328	0.044791781464859536	-0.13361313877105113	0.07516779781699252	0.01972313942992275	0.10283060513724894	0.09686031393190303
251379	NotSequenced	NotSequenced	NotSequenced	NotSequenced	NotSequenced	NotSequenced_adaptive	0.3228857422879713	0.025280491399256068	0.32575523249080546	0.03572730881722712	0.2032571952352602	0.0530937918166444	0.2412186187531633	0.028699056286611638	0.28404447990960485	0.030520835566255424	0.5093746675833529	0.05453462050277997	0.3738583280125515	0.03241625543873336	0.440956682991093	0.03293176080762717	0.15918579836575278	0.029804507676379294	0.08695728644034384	0.04199471896763758	0.6321141243097047	0.04270445649186952	0.3610068558892275	0.033418490679805284	0.3057741690730817	0.05608412196230895	0.23466067742761856	0.06800463058640775	0.5464435974517564	0.06829884370205239	0.5365476618934171	0.04934433416645261	0.6689194229973411	0.06932888979866006	0.26936805986459283	0.1052955146458716	0.2468810855409337	0.032801462190159315	0.3020761001423149	0.05946634161440657	0.531049490365758	0.03317196854704365	0.5214587009317718
254044	other	other	other	other	TCB2-upstream_point_variant; SUP51,CYR1-upstream_indel_variant; DMA1-frameshift_variant; LEU4-missense_variant; BAT1-upstream_point_variant	other_adaptive	0.12852830095857695	0.02960500062231013	0.17363897362977096	0.04151783492012817	0.18465680954815406	0.0651098059240382	0.22126083357564652	0.03245174441072415	0.21731315766856651	0.03281358036312584	0.06878774875867709	0.0641274889286962	0.2671733615142893	0.041937991208600166	0.1341977978412722	0.03767968666582494	0.12695883104542152	0.03412610179404699	0.1949703739914538	0.044459787562360714	0.3524851921262511	0.049801004252519335	0.242769206077652	0.03747692758550294	0.2417440660357532	0.05958226434100439	0.17573775975280356	0.08061769405878091	0.16785431094015002	0.0837683832967934	0.5007399007552543	0.0533448348465804	0.6518812650967808	0.07094632762198791	0.15734443453596314	0.10945013620055542	0.18990578671237635	0.038716214125108485	0.14218260811577496	0.065359179112289	0.4691835738757596	0.0579990862367703	0.41309171240076603
258539	Diploid	Diploid	Diploid	Diploid	FIG4-missense_variant; CNA1-missense_variant	Diploid	0.25884418669857256	0.03181142818474702	0.3763850351185705	0.04481908572705968	0.2326935497718401	0.07874028856801897	0.1597948946039177	0.03623344170184982	0.29601956825671605	0.035891351395048135	0.485887248753028	0.05559519898181885	0.3549243588665396	0.03391916174362698	0.3941914963283112	0.033607337390853864	0.12462284362935475	0.03898963399730987	0.1118427567425618	0.052260752921822036	0.5477034231847095	0.053488340830085405	0.32307634630727605	0.04061103694496635	0.4150085408309787	0.060985363247274216	0.3949122979011643	0.10651473033424663	0.4195470966835557	0.09629539455015493	0.5149689698230137	0.05700595677200367	0.6895461692690866	0.07547501377494696	0.21644265600900128	0.11455402579007412	0.3171818556409149	0.03825862308420022	0.25249249346568736	0.06521254365220114	0.559668122976765	0.04168896942587833	0.545549249154965
261861	Diploid	Diploid	Diploid	Diploid	None	Diploid	0.22917338532061796	0.028880828408093175	0.219258677538468	0.03954598484756699	-0.020117097963484185	0.07179551185408742	0.16679979747370172	0.030970135693377827	0.29370876265840995	0.031634382542887966	0.4583569382141406	0.05540912655063141	0.3457221358125676	0.03376338149118167	0.44134484132944396	0.033957569248535824	0.10925743189285976	0.03369595073943662	0.08394046923161771	0.045533547730402885	0.4494433172826677	0.048910215003074936	0.331479444253905	0.037261348611294834	0.4463109873305146	0.057401106738350034	0.5200687298201317	0.093966778387584	0.3767357281204345	0.08764121269823784	0.4746289851033376	0.05534054374124407	0.5540109132461468	0.07238586274729399	0.07497477460884003	0.10915313840828532	0.23926683889525224	0.035066394225506566	0.29207357873255546	0.061921551404375816	0.479848345741116	0.03824654713929195	0.4662160287071645
262917	other	other	other	other	POP4-upstream_point_variant; FPK1-frameshift_variant	other_adaptive	0.2903969705942685	0.025212185842381787	0.24551606756907	0.0328769539673829	0.25680678912567545	0.04733565339375978	0.2886047278713874	0.02819314152595178	0.22030409300656675	0.030613148215730007	0.2899954337500964	0.0558859113285218	0.21649624384251875	0.03336030465871686	0.276838668413576	0.03431855376070981	0.2809243132483812	0.02777194225298558	0.2555075484163599	0.03583888248052703	0.3554525639144873	0.046529381218981085	0.33492907522642623	0.0350973573924014	-0.018863034926693167	0.05790592216448385	0.6565959949350781	0.04201281110707528	1.077290854485759	0.05171665242896421	1.139315344820122	0.04449895791776109	1.6120208992798355	0.06654537412346177	0.9929006122635324	0.10074612707400203	0.1544243321066265	0.03508540047619255	0.1800620425968545	0.06356176080984723	0.4182568039499197	0.04336719566262254	0.4105634896368492
266802	Diploid	Diploid	Diploid	Diploid	None	Diploid	0.2583518392394343	0.029723313971583745	0.4091926742871851	0.04226135561436335	0.07847915875842011	0.07282998630570206	0.19571752612311533	0.03386074366792709	0.29212149718446445	0.034129539557594915	0.5046180243964689	0.0537123880317496	0.3425126324269322	0.031688135523773024	0.42582487763139504	0.03233791845864389	0.10137478379272054	0.0368123025826397	0.10798604547037408	0.049363555775776016	0.4381144451993551	0.05101577186158472	0.3691891366038828	0.03845692836253666	0.3780370595859519	0.059276542826972686	0.30929418769606065	0.09853370113361537	0.5158091793017435	0.09493768020207333	0.4841091836866051	0.0545261102896512	0.7710900849728051	0.07184562572091925	0.13536361924006746	0.11028498154203778	0.2897242670828972	0.03612520601584734	0.3501439171226573	0.0625752065804538	0.4548382002236596	0.039352892773566316	0.5005091217048722
270104	other	other	other	other	nan-nan	other	-0.030098366455562145	0.029465456175988964	-0.020735946581484525	0.04016003135443185	-0.0926254907643787	0.07081799332651638	-0.04875100171456277	0.032798410837639264	-0.06318059133856697	0.03560772819274307	0.035117562488644415	0.0610262340141313	-0.00698680683793574	0.03929169136296192	0.015333396194960712	0.038731297226949936	-0.013875445302939259	0.03372352938752784	-0.022267087955336537	0.043674165452831794	0.0002046868998766804	0.055467632568587985	-0.026181201247387192	0.0411698777811891	0.00723557214492292	0.06452255758791398	0.06049893691289825	0.09944296718246833	0.012789946336318804	0.11546187001996573	0.07311345060588205	0.06337769407374637	0.1556145022667843	0.08533544385873051	-0.08639661211547563	0.1124791985385738	0.008061641443074004	0.03735453016729567	0.029749093132371226	0.06441221189893183	-0.10910036761323899	0.0835411705596451	0.0006197744303691942
273092	Diploid	Diploid	Diploid	Diploid	PYC1-synonymous_variant; NMD3-synonymous_variant; SNZ3-missense_variant	Diploid	0.20766890778696476	0.04176673194332561	0.39706982184408457	0.06369309491335348	0.15070196298564575	0.11177854971642312	0.1216209150738394	0.047844688956939885	0.2638247875859238	0.04725745253222065	0.3334121592742664	0.05592084635888327	0.5775239484050516	0.03485465736033588	0.4095344966220341	0.03259131305862329	0.13471597906028984	0.05104677996437086	0.2039600763656478	0.06456778636005585	0.3057173455833864	0.07204232067121598	0.3730550613550848	0.04827773704645538	0.3327816860407829	0.07467250793476565	0.3780292860670208	0.15223237087998415	0.5463389076147503	0.13068622107017808	0.5402319723650223	0.0748668540396607	0.5930020934895756	0.08545866412900481	0.05300418587141408	0.12970876622109118	0.3278430896626231	0.05048947917026602	0.19568958120248306	0.08180659744064453	0.5997740838022139	0.08517033973791932	0.5753599607281444
276407	other	other	other	other	nan-nan	other	0.03571094035839464	0.04186582073025327	-0.12744546953654992	0.06572683033983312	0.07182680592430203	0.1120328325674379	-0.0214492349530035	0.051295906229747	-0.04309863461673783	0.049951790614912985	-0.1100567096128022	0.07088286376969972	-0.20065943535212172	0.05062183022025437	-0.12617507973329314	0.04573009893095891	-0.02828044006135728	0.05495015689036172	-0.016308989875661272	0.06315374016200732	0.14499563224380552	0.07735937201815322	0.09295204562158473	0.06289965414852282	-0.03708780200831245	0.08356879164134036	0.19701535650259844	0.17481673958940536	0.16260707638314287	0.16137954508304428	-0.002916341026203969	0.09362247821486867	0.3879487640567442	0.10960923566696136	0.08713879274901216	0.1302782422890992	0.012722419941406963	0.04809649379176297	-0.003464786164626444	0.08193440594917599	0.1218333450055962	0.13994470997265412	0.12092288154700295
277185	other	other	other	other	MSK1-upstream_indel_variant	other	0.032518397146650536	0.04422804815384513	-0.04672491011413689	0.06905879430619634	0.1097200674405315	0.12122862872954987	-0.07353738636317922	0.05388700137938562	0.09459858408345603	0.05166696009043864	-0.07844285302750431	0.0779595007715637	0.19112320515070735	0.055297998608417234	-0.029919333490205938	0.04670382634218167	-0.09027088240544846	0.05911774963523868	-0.059009599831702376	0.06600252906348365	0.06370696193156578	0.08166863251397162	0.062491066878614936	0.0621897013930192	-0.036345813153558726	0.0809741024161917	0.22059034791320944	0.23039277143388104	-0.09726449071742094	0.19064681557622395	-0.09354617927698032	0.10790860284062748	0.15573161581311987	0.12706009806778565	-0.02023684531685876	0.14106442708251207	-0.012394033698909507	0.06871258360531399	0.04439489054924255	0.0940375015866804	0.49704872666045596	0.1080602173465248	0.2896163035426443
278476	NotSequenced	NotSequenced	NotSequenced	NotSequenced	NotSequenced	NotSequenced	-0.04997611764987277	0.039791967719198386	0.09971997038307998	0.06255186321241814	-0.04182295449629075	0.10811997555788716	-0.011103127290703278	0.05211122869053703	-0.002615239333827585	0.0551690984228008	-0.0009613130629398582	0.06203883073332469	0.028443418208094186	0.04019925791625794	-0.009274657866983444	0.03844925291615117	0.02077202134268723	0.05315539823875245	0.03396948378312354	0.06686085009402835	0.015773923807548242	0.07967868930655858	0.056466428004344836	0.059364345027945575	-0.030579527913122264	0.08267235161939301	0.3993971351888996	0.15468330049120907	0.059640907131217565	0.15729650139060908	0.041624921142082966	0.08721445352573777	-0.10785389723113407	0.1295357064578611	0.009360722230312028	0.13168075756371672	-0.047807642966957296	0.05397163015833799	0.033654944738105035	0.0824825463229587	0.284058944280852	0.10244860944083732	0.19056000310512
283952	NotSequenced	NotSequenced	NotSequenced	NotSequenced	NotSequenced	NotSequenced_adaptive	0.2805868823144824	0.05641510211031098	0.533976214315009	0.09228657143485247	0.2606120505032579	0.1424926130531337	0.22436758398335446	0.06161746744090536	0.3950374202764526	0.06362567417151811	0.4483078237110418	0.06991617888132771	0.5015082165899746	0.046722740904926	0.4148135766583234	0.04220668574457808	0.09933251607357783	0.07784753374892063	0.13355493439834615	0.09333780392061318	-0.055569801996406966	0.17481147912971226	0.4349459185402269	0.07245270994285936	0.4311192637642096	0.08262656168892825	0.7379082333839074	0.1989457712645838	0.5745967832711939	0.1583087467427947	0.3064074154024882	0.09373478061200212	0.703532828530577	0.09650203696960638	0.4306079623934707	0.16707749545460687	0.23392152451874795	0.06194144404294734	0.3206033779256869	0.08896583782179451	0.5912945249714203	0.1070646471766154	0.5531734851085439
287352	other	other	other	other	nan-nan	other	0.043015949084753806	0.04123293358213941	-0.01932958427395209	0.060454420182070916	0.006954506419749379	0.11592948972038103	0.04383258336260678	0.04723392047670948	-0.018302697390220345	0.054567770578442365	0.010852170471286064	0.06318891894236231	-0.012236699142125563	0.04208559304183828	-0.011098871942462169	0.0388487755647478	-0.03328173502113864	0.051601798342971614	-0.03813368717871103	0.0649441156848768	-0.015284301971665547	0.08200820525934965	-0.06620237044961087	0.06309423399158542	0.005144257734974354	0.08249971817831554	0.23287777277834684	0.15471317297371784	-0.002447246940171065	0.198117628114589	0.07739260688620686	0.09038163593450667	0.08358861386257918	0.1187489328570436	0.07069247311239853	0.13309347046523365	-0.035521717275418106	0.05281781336098819	-0.0056389092747855425	0.08419132902155964	0.10763299021963676	0.1088328392603942	0.05761446383279644
294706	other	other	other	other	ADP1-missense_variant	other	0.02301680695846276	0.05505384065291853	0.0594787800984035	0.07388441381854485	0.0117812097990681	0.14389847718653676	-0.15058234924836614	0.0639341216715933	-0.12912931597262353	0.07425257822465554	0.02244988509736076	0.06401109295751949	0.01907750847652178	0.041442239317624766	0.023031609282537016	0.0395140835205618	-0.1453361956148217	0.07380361807500052	-0.04178925239856289	0.08018363464320473	0.006687883545923468	0.10918920576424336	-0.08969212385068172	0.08177824441592624	-0.011115863383243595	0.0933773102931164	0.4168065741066216	0.20368643721151006	0.3542051365646357	0.2361924194861843	0.0522591520564999	0.118358973939507	0.3256752660908488	0.14031772911789867	0.0842795128607067	0.1396748205639048	0.012505006978735337	0.06619373962978667	0.007574491508182374	0.0940288086273672	0.2129932862510432	0.11868706020524072	0.23432799545052904
295458	Diploid	Diploid	Diploid	Diploid	MSK1-upstream_indel_variant	Diploid	0.2275706308554343	0.033243888504911084	0.27456261053703285	0.04740649293222536	0.3617548008570979	0.07958882916523681	0.16818214942004633	0.03644089862828201	0.2897486200179549	0.033627889487143604	0.43773469631464346	0.05878037773511045	0.5314613967684643	0.03744697785924594	0.4471625056801189	0.035413281470554635	0.1396430194707372	0.03858738997701983	0.08694809937397252	0.048617382600280486	0.6351868302646441	0.04941404265948473	0.3240438332137961	0.038496495033110235	0.4836544518888023	0.058171827879603885	0.4061646126548254	0.10717120803552728	0.4438533468924059	0.10325354856619062	0.4378030729618079	0.06039206005640337	0.6088563777956171	0.07382764042163728	-0.24465309559908405	0.11807052590565364	0.2473034157936993	0.0405625738930948	0.2446340197800694	0.06695609841321973	0.5242961929130685	0.03958441118241333	0.6225085591957755
295730	NotSequenced	NotSequenced	NotSequenced	NotSequenced	NotSequenced	NotSequenced	-0.04212471114469697	0.059223204673059075	-0.05565155048117735	0.09292922278112348	-0.06739112718643597	0.1861047220519181	0.058084683180703874	0.06455647364238194	-0.058972234226554274	0.07296125903415716	-0.08746509281288034	0.1095397138545664	0.02004283633917131	0.07661137394858462	-0.013155426171712323	0.06663178717589338	-0.047965565690189935	0.0719961241182706	-0.042771952342840334	0.08543144454454565	-0.0493951820932261	0.11281422103784328	-0.04748652456925143	0.09190891597368496	-0.12838297008030367	0.10917652745484853	0.03577732699895583	0.30363602736545897	0.037143535931958856	0.3493984830763916	0.07729565104034551	0.1331265952409083	0.3251070625595408	0.17665089670558576	-0.2198005454240124	0.19043341457875165	-0.07331320249556615	0.07605744205999708	-0.01947158896249094	0.10795684182525586	0.17213154798159447	0.16785590198905134	-0.18650055765386386
296771	NotSequenced	NotSequenced	NotSequenced	NotSequenced	NotSequenced	NotSequenced_adaptive	0.20956622870335556	0.055423883784710894	0.4804363118274245	0.08442466730396618	0.25635832117409485	0.146235505331678	0.28346083147585793	0.0666377113501665	0.2783326184810824	0.06921727302936771	0.48443623788396595	0.05420671450962192	0.4106005806758833	0.03220307592711212	0.42622448835257737	0.032599451787249364	0.06693630027974258	0.07727384358402145	0.05896022741648814	0.10339262334739308	0.3520315195877531	0.11097709307476933	0.4558006804085308	0.06670136510143126	0.3526268948855013	0.08923676423281149	0.21275483058205089	0.1985443869134713	0.6506732038493046	0.1653254767120966	0.4695996130345368	0.09013889068352704	0.6381389816016261	0.08782975886202286	0.04263457745093363	0.15903385608688209	0.3318413899564875	0.06379308816575427	0.4629414040354578	0.08990113851149288	0.5165375882483668	0.08103364832057344	0.4302949731890451
297322	Diploid	Diploid	Diploid	Diploid	MSH5-missense_variant; PEP3-missense_variant; VHC1-synonymous_variant	Diploid	0.2151833388056368	0.029496660223884176	0.3026992559850347	0.043317567132605865	0.17293840312353315	0.07213004055404568	0.2149404187518901	0.032639999040999505	0.2913128376888839	0.033390547398868896	0.38729642151276494	0.05521792758237305	0.4567273437894916	0.03374234703084607	0.4073089592235433	0.032867181753071274	0.11640165084988842	0.035217857860282344	0.13657007914560546	0.047107110454112616	0.28313679291880645	0.051205195721670746	0.3369919472115581	0.03705754618678486	0.33431699450180924	0.0604805873204891	0.1974421759114544	0.09468336273209893	0.27229807921956656	0.10251150131500833	0.31119195213589856	0.06599500163965367	0.7475871440850897	0.07259534360458088	-0.2470559639488492	0.12540276037944054	0.2786873568209173	0.03644691038484155	0.27942388870817103	0.06325051989514567	0.5157417013436898	0.04723250039767951	0.4333471392833615
298344	other	other	other	ExpNeutral	FYV10-upstream_indel_variant; YKL177W-upstream_point_variant	ExpNeutral	-0.0876810801124198	0.04076175227715819	0.07164008168147212	0.059082642487183215	0.13308720474465358	0.11168037887314693	-0.013282884786867122	0.04782221140866958	-0.007980006977300502	0.05060473459355251	-0.022664770112886614	0.06308040593656009	0.09457507120664424	0.04200542479783613	-0.002616245861035012	0.03786361335842271	-0.009496685116145204	0.0528259718983337	0.034644796284087134	0.06284926357789143	-0.03469046224345871	0.07393244441404194	-0.017260724356672842	0.05916340872573219	0.008481913299952579	0.08299665887493257	-0.020346374935118018	0.17478860794375664	-0.11720691902714628	0.19873743321068768	-0.0010130687953829182	0.09387107663234298	0.22028280467114192	0.10490716575225424	-0.13250482801916785	0.1399484595417119	0.0531934432091452	0.05382876075624269	-0.036063321613959365	0.08293780857360628	-0.07649045922215525	0.1758320988696032	0.2779518137710815
303501	other	other	other	other	MTC5-upstream_point_variant; SNR6-non_coding_transcript_exon_variant,non_coding_transcript_variant	other	0.0017453521335151993	0.03516155469126833	0.04887361638282016	0.052078697066290106	-0.08127897533350542	0.09303547189754377	0.03880169579627738	0.039411502428616886	0.02804107142474256	0.042183411964348716	-0.033087651461787694	0.060363232342853124	-0.004824541344211171	0.038988772442122434	-0.025804123748325584	0.03713930046648623	0.031617709291390635	0.0411017000795991	-0.030697557784352538	0.0548995647006523	0.09359185896692504	0.06477554409629059	0.031606796062479375	0.049836061055934695	0.08723951288001312	0.07436260096208018	0.2992303319723842	0.11814295117848445	0.06298492485572338	0.1484342642543393	-0.04738042825429049	0.07975128605356448	0.03568147212595508	0.10145069252231442	-0.02904230266914743	0.12285155275599445	-0.0012379546566709794	0.04647116563634897	0.03085090239883832	0.07344514617286259	0.1232879891420918	0.0924648546297908	-0.05197470380866759
304483	other	other	other	other	PAU16-upstream_point_variant; BEM2-missense_variant; YOL014W-missense_variant	other_adaptive	0.1887378292103656	0.030650482083211406	0.23618125065658696	0.04493357557256401	0.2027763308674004	0.06333555974061691	0.19212851043455334	0.035941767018333216	0.21145516713752568	0.03541757111662994	0.26085943172441634	0.057230046840356874	0.29851547583602506	0.035396927887512385	0.2220431967315556	0.03484529734619589	0.12827355295586884	0.03794029003019032	0.16599618687853607	0.04562086457209686	0.3422618927471522	0.05122047811059922	0.23669236819517198	0.03995417644319155	0.20059135319278376	0.06189289002072845	0.5732486036934639	0.07985126004085764	0.415468738632382	0.08435806265430942	0.43436202268916096	0.053839506438905484	0.4649141579870039	0.07765839221062754	0.06369245226997318	0.11161952855756566	0.10713530391768043	0.04632470157282125	0.1359640559052108	0.07294180004042176	0.3683780174157961	0.060582269337420315	0.4498977809980088
304935	NotSequenced	NotSequenced	NotSequenced	NotSequenced	NotSequenced	NotSequenced	-0.004110873146356266	0.03689894700629599	-0.0374899844813088	0.057259278074751514	-0.15299245463092076	0.10342789839078297	0.026475989577410968	0.04386446013887195	-0.03504522011778537	0.04877550164099529	0.03718496613066394	0.058908280446524665	-0.048246338107141885	0.03681148981632781	0.02035958081111633	0.037236758821438606	0.07749660939245083	0.045091873837014594	-0.03548989747779982	0.057287661544708116	-0.05710893396329055	0.07469539304453945	0.011050046418009492	0.05522305922093503	0.04125817320884609	0.0773684983374163	-0.01444099316943995	0.14650346146433685	-0.3132340115414814	0.18685524783947147	0.18366604626634936	0.07539938757588338	-0.06045845600284869	0.11462405083002612	0.014324358477374184	0.12036513134747027	0.029011464330755063	0.045335709042971635	-0.0382223054962675	0.07513861867072348	0.209087923082929	0.10747031106755382	-0.108442097146562
309605	NotSequenced	NotSequenced	NotSequenced	NotSequenced	NotSequenced	NotSequenced	-0.03435181804989722	0.041640879516101535	-0.06741023835687991	0.0653712980579237	0.036164550199445575	0.1168775097185392	-0.1537841975862952	0.050014801862973454	-0.03237069787027147	0.050569830339531684	-0.038251496412718966	0.07568467059279366	0.19870214045869816	0.05331054484887773	-0.07107972993859861	0.04430924955415007	-0.12646391532508633	0.056509285618484215	-0.0722702258710799	0.06020859721313211	0.03287240883330925	0.07249446394211785	-0.030298744991367445	0.057964978750840515	0.027458847232543104	0.08145377973665363	0.6574187203416588	0.140999338317645	0.412644314868505	0.19428423933171984	-0.062171626386933236	0.09440045598185562	0.6167355163753335	0.10762326952522333	0.06839022610172743	0.12892684341803468	0.025472863060022253	0.062454688173955615	-0.054170013242533434	0.0885100902928622	0.10632299780502157	0.13642641725444796	-0.09347427125745117
309655	PDE2	frameshift_variant	Haploid	PKA	VRG4-upstream_indel_variant	PDE2	0.6220583890161141	0.020547909266731786	0.8092405636781683	0.023313026182603808	0.729943725083433	0.03417452463431258	0.5647620773466101	0.022731290936802342	0.7921133486467011	0.025018688519056226	0.6061880787262287	0.054472532659063634	0.7673207925726835	0.03289032897887783	0.6935357558788623	0.031922367601794045	0.7054190749856938	0.021636393022060798	0.5114824851607098	0.030526553375901093	0.757127736738316	0.03741242920083316	0.7407274864739831	0.027687551714249997	0.7356508858151033	0.051275966039472085	0.8301548146734498	0.02884620046337965	1.1269605018490567	0.05000176427036943	1.0934170791187672	0.044548053385197364	1.1706558319631457	0.06680318608544121	-0.4588002170186366	0.1034413663824946	0.5560276967500145	0.032167255621189834	0.4942841736871962	0.05874617149840852	0.747644918478818	0.031422340906402675	0.6045464014615008
310209	Diploid	Diploid	Diploid	Diploid	None	Diploid	0.3104898456487508	0.02509448406854704	0.3830532145975499	0.03328165494303121	0.2257751233020487	0.054171059826078304	0.2014842549753337	0.02766595795674923	0.2832839374708959	0.02962108266065202	0.4906655091805661	0.05429402068130058	0.3680424633394084	0.03236543137326457	0.41360232512863376	0.03274246606376677	0.18571782624455152	0.02846869086782029	0.10389271465200282	0.039118891241207265	0.4521783245377327	0.041691314969438224	0.3162283253704807	0.03276616072536781	0.34439522811536954	0.056037722775452506	0.2940795760105141	0.06973917085120468	0.5424232399096832	0.0729752031872765	0.434763685267215	0.0499592729870624	0.9026032747474227	0.06851341838171568	0.10864647968754906	0.10531069270684064	0.2804620911325184	0.032831728030823744	0.3558248864727881	0.059374692926476014	0.5078436244358238	0.032498543372444746	0.5100785926607776
316048	other	other	other	other	PET127-upstream_point_variant; SUP61-upstream_indel_variant	other	0.07853284257660338	0.0323710948514352	0.10027915031153407	0.05014753174365693	0.03196224307352387	0.08298046319738421	0.00856749265930031	0.03998086425919917	-0.0013599365127013913	0.04355323404937952	0.0338701848998259	0.061133633626568075	-0.00930274726585642	0.03941807619088604	-0.032540586092645665	0.03854276908212384	-0.002167675045495645	0.04411022914902323	0.011177633630221713	0.0530669408465994	-0.0712344159483806	0.06886668793994595	-0.017719952354908825	0.04789575140995427	0.025999657016940268	0.07419317619655369	-0.07958236042300566	0.14706568444870685	-0.07717427961476507	0.1570673048660478	0.07498088480547864	0.07530717531199492	0.0950525470490272	0.10102299413373712	0.016323617209399347	0.12078495786435607	0.00602442637411026	0.043721728494538384	0.014008720175958828	0.07284107468656477	0.1310109091208174	0.07813302423268091	0.05186740152245695
317672	Diploid	Diploid	Diploid	Diploid	FCF1-upstream_point_variant	Diploid	0.31184810157242243	0.02933252139749605	0.2936816547943861	0.04209674347308605	0.1748604910611619	0.06655156435089479	0.23458112470340345	0.03286681030406602	0.2596437168348901	0.033709410288827416	0.5080439725572766	0.05346841239598121	0.3715730064438392	0.031475539001628486	0.4470217780276671	0.032309978452288814	0.13900865620161024	0.035059352744943754	0.12152819653758072	0.047721249972844486	0.421888071449409	0.04825872314698778	0.4322802822991863	0.03620302830593405	0.3603914810449621	0.058706442957441936	0.44104548932183457	0.08501730876133899	0.4448609885468661	0.09112396908179302	0.5708561852207528	0.05204139061964037	0.8958536669419731	0.06933127221855938	0.1348640579743316	0.10797767443739503	0.28408204955252664	0.035046787784694534	0.2908301366770455	0.06277509813068284	0.5894268742637179	0.040569128536026434	0.5397175099051535
328579	Diploid	Diploid	Diploid	Diploid	RKM3-upstream_point_variant	Diploid	0.24133406853133094	0.02601550925615807	0.3077653640966135	0.035015378467628366	0.1736569180314504	0.055373962889936006	0.2395342252651469	0.02804094908854531	0.2595552095640215	0.030050890798657786	0.4271695041026576	0.0556340185307968	0.4635785875393117	0.033956333874017475	0.4541860570158773	0.033217337193815345	0.13228952593145168	0.02915953159442165	0.095160636164023	0.03970842877159407	0.4603728030743555	0.04469652043385385	0.3735617400844404	0.033184800703436525	0.3977659255491513	0.056179017031698586	0.255352724118017	0.07406325540188567	0.3923060356781173	0.07347629805459427	0.5397198528004827	0.050609724968860965	0.6828010132664144	0.07033299045778509	0.09303874036392902	0.10621686213342664	0.2796594618522264	0.03364012508058166	0.2538340226662897	0.060597499123344736	0.5505762602141236	0.03772279726428877	0.4634694053287358
329774	Diploid	Diploid	Diploid	Diploid	IRC5-synonymous_variant	Diploid	0.288143983872496	0.036623855143322975	0.3125093092750646	0.05572023458619759	0.14436217396280265	0.08943997543013442	0.2119770633503741	0.039152712696634666	0.3358371535045204	0.0390294122943683	0.5006948898288008	0.05557573311226046	0.4468681980824016	0.03384642742162197	0.4605857826339741	0.033701742898576866	0.17254996848776608	0.042198686523404264	0.12947958804050824	0.05761892134898405	0.3915711210348681	0.06027331155832601	0.4640671552352997	0.04472928698736886	0.3999300615970168	0.06298004600670412	0.16279109271858205	0.12004766037527727	0.3877707132874987	0.12027232351489946	0.5865783950850777	0.06398741846713434	0.7701227187364549	0.07454736813034689	0.2676448322188888	0.11452523678552498	0.3230975313438443	0.040335011704582896	0.3010771214857022	0.06837784339757015	0.5380383553002229	0.04483108524091607	0.4689940662664903
330943	other	other	other	other	nan-nan	other	-0.0065851770057385114	0.03263413452630762	-0.05681125651838705	0.04675236289827147	-0.13763216721115032	0.08277439589986195	0.02449254234028804	0.036023507955587106	-0.0036133913993557022	0.03836131138401026	0.023572660576616063	0.0588896141782972	-0.02463764090206813	0.03740739851671638	0.03306656389947394	0.0366164618053029	-0.02007508092422261	0.03924197861521271	0.07249471746139498	0.04671711270967615	0.16487276911819818	0.05553506735722913	0.06537412124620368	0.04452699625201754	0.03351961298294651	0.07010824694810537	-0.0320172366090927	0.12175587090972677	0.11576180281108192	0.12821698247682933	0.06693615404109123	0.07024404239136542	0.07635450170309653	0.09379657356347246	-0.18180859969951493	0.12052664951280664	0.02507532529270561	0.040819891418696214	-0.02878305027756445	0.06904721161590764	0.06574193137421121	0.08911836250274167	0.04903817346170626
334616	other	other	other	other	FAR3-frameshift_variant	other	-0.041394597710412886	0.043221993104149384	0.00875536823577712	0.057728427127849126	0.2445453705315241	0.11583799200427725	-0.12123722527805772	0.05252459481585299	-0.1134200402280916	0.06237135266746774	-0.015113200951943991	0.06410841215724397	-0.025588980483378026	0.04212075576981197	-0.01884775177505981	0.040609418816384295	-0.09737118963180504	0.06083801216660902	-0.035501566051975214	0.07294566362477377	-0.2623478842090515	0.09886342561570108	-0.08134846559511183	0.07790855530703568	-0.014529654333208228	0.08551411801625845	0.23539481697607664	0.21083663257770127	0.7453301495254563	0.17632678287303638	0.360669605260384	0.06131413349923584	0.6051463426351631	0.08163523739861722	0.6483393984278571	0.10536011826733327	0.0769174803508685	0.04472356975820796	0.1145148378453794	0.07545246614124547	0.0371088427282308	0.1113331120418102	0.012578664114108908
336972	SCH9	missense_variant	Haploid	PKA	RET1-synonymous_variant; SUL1-upstream_point_variant; tR,YDR089W-upstream_indel_variant	SCH9	0.3797781210712134	0.022607083830582204	0.4858482427327334	0.02971683769413142	0.3093513783779673	0.0398568829427665	0.3741415573733509	0.025203047254008612	0.3896079792415211	0.027584381609407592	0.2974902243637467	0.05389219270253258	0.3915643638508977	0.0321385374927307	0.17905822913973435	0.03196574313559745	0.4902696985879535	0.02402280962849901	0.3919377612155273	0.03243255849536087	0.20195257697836508	0.044952979557888816	0.4486450367311584	0.0305733687003777	0.1166935072765017	0.056917530761273476	0.4509631608530221	0.03912983888284087	0.5669449177787808	0.05620808639676686	0.4841599390671178	0.047326568455457976	0.8560933484225182	0.06911664356006711	0.13378450111994475	0.10983764522672694	0.3953348715154552	0.03473709107238695	0.21190468443966934	0.06093830807710737	0.4642926091641572	0.0419111868205801	0.4485554149146794
338908	Diploid	Diploid	Diploid	Diploid	YPL205C-frameshift_variant; APM2-upstream_indel_variant	Diploid	0.2833198853798912	0.02779378053075136	0.31534920124699245	0.03909437873525822	0.2176268611299439	0.059852079824975375	0.18122412298215695	0.031482860190259934	0.38230617838237135	0.031072565636141605	0.4809893617504599	0.05611993052163414	0.4895446115453669	0.03436272401679924	0.4561701964580002	0.03379753221209618	0.11763240807538827	0.033468423605777016	0.054158240180153916	0.04475922069299284	0.5313092283260237	0.04531466611904462	0.344858896641837	0.03480702030711304	0.4499336685849313	0.05618167340914389	0.3578164280296581	0.08340322484389602	0.3860257385091134	0.08389230309725887	0.5822832130500515	0.0527230219704719	0.6935918662885711	0.07060261784070546	-0.02140827942598077	0.10944678809606448	0.2575901424738838	0.03587215973898597	0.36332060704355396	0.061661694483819786	0.5025209621967238	0.036038036085728704	0.5521733250559163
340123	NotSequenced	NotSequenced	NotSequenced	NotSequenced	NotSequenced	NotSequenced_adaptive	0.2589566629505393	0.029100804723621344	0.3705754553070408	0.043325915270844534	0.11654063794643815	0.06748005596168935	0.2289782092881649	0.03278426834097227	0.3458854238504445	0.033775553227993964	0.5059741273010211	0.05507197630814442	0.372692899021196	0.033177692170756036	0.4206398104556048	0.033222653925717785	0.19665719362393	0.03565767508429868	0.14661770347399591	0.048325371140403216	0.4464735787578045	0.04753899702474609	0.3522445108976083	0.03773480120123775	0.4239216579987904	0.058264071606420414	0.2909265027379063	0.09353127012480926	0.4270208097912422	0.08975408942075848	0.5073337446584456	0.055003770463260375	0.7783615581962154	0.07252153148875523	0.17060442328697634	0.11205619568472301	0.28621625579638593	0.03570375952798422	0.3294178710213219	0.062242988143650965	0.5078872660746435	0.042516375924805686	0.4697310937131074
349198	NotSequenced	NotSequenced	NotSequenced	NotSequenced	NotSequenced	NotSequenced_adaptive	0.25343132870193125	0.02702372815959104	0.2939089072308125	0.038230014290410036	0.11443035672045394	0.06070319922393003	0.25268423256404304	0.02964496461951628	0.2685462175335844	0.03128865070328133	0.4746691770091527	0.05548081153281338	0.3832386258468857	0.033665631166751184	0.4346145110818144	0.03336543638256529	0.1476630973680092	0.031915333261552825	0.1539831369837795	0.04360673435697332	0.4895499475887032	0.04693389555225565	0.3712873308510017	0.03445636744432588	0.3725141290005725	0.0570916882729141	0.16375280122127012	0.08288058409845149	0.2857462510378769	0.08614240376279245	0.4301523329696637	0.05494110290642264	0.7421417333882858	0.07111947424591235	0.1011131527798074	0.11118669077861723	0.3032973119123577	0.033767431413931966	0.3086542197876665	0.06080810485079095	0.5584412394459544	0.04021388382043351	0.5562581841653721
349927	NotSequenced	NotSequenced	NotSequenced	NotSequenced	NotSequenced	NotSequenced	0.11659193283585324	0.04062003286287722	0.1868984709831916	0.0620190286892655	-0.012501893938040328	0.1190608253867838	0.08802121584487113	0.0444824288225046	0.09424779308311583	0.044985414510588725	0.2675666754813069	0.06178793446012942	0.3578071953480075	0.041009254560125365	0.25569976768321445	0.036652171929827546	-0.05895629163512664	0.052573024929894095	0.043674504337146335	0.06355846124243476	0.14193548882569645	0.0720974282595213	0.1284608343052675	0.049483242975109705	0.3619888099159969	0.06806444458886587	0.5997269022295024	0.15925578703370147	0.5379177309201952	0.13998731426595903	0.3978617016676527	0.06851763252024233	0.9681686060072	0.07624469129271723	-0.1952044592428651	0.12511931959100628	0.14111396884571928	0.050084420933823724	0.06877050944181723	0.07935012480339143	0.2878963357731503	0.06216841973885383	0.3985955365547732
352078	other	other	other	other	YEL023C-upstream_point_variant	other	-0.05826814480260424	0.04939213877090856	0.03810218386110408	0.07330479408776218	-0.13151132243886962	0.15207184568930635	-0.11246910560824804	0.06371467741079488	0.016778572053322637	0.06685763469483602	-0.006590039178673405	0.06341251037844163	-0.007860065123116619	0.04206595834478554	-0.05693040940699728	0.03964142346690349	-0.016366012005708117	0.06691051872951789	-0.0849557773352995	0.07915283704490914	-0.04344038430132344	0.09308514485708397	-0.031712079593426416	0.07091699408709584	0.031485828039678115	0.09271145362453702	0.1021136042170142	0.2421185712398265	0.355036017785673	0.2323962490067389	0.020537423329796314	0.10925570980085404	0.1308675139647774	0.1290904127548425	0.019333629974820875	0.1492684596780855	0.019639497281037657	0.06463137631163407	0.03635380438148346	0.09395789622570594	0.14803880142295686	0.15957820433048808	0.14321783509935154
352705	other	other	other	other	nan-nan	other	-0.0686571945872095	0.06546525997707398	0.021129462868567855	0.11168979637601577	0.1550061068796774	0.19696643210683049	-0.07483465601397342	0.08583255707610014	0.14839282503083198	0.10345247517450533	-0.020651565712194928	0.061828464220438785	0.11353321681520917	0.03997812955971865	0.061354484015427826	0.03687798886710558	-0.037264671711654165	0.0944084629813532	0.1521487112941644	0.09651965794047784	-0.07385360978775593	0.14696788786669596	0.10012567387651718	0.10869598180797874	0.08183747421065818	0.13723949268283853	0.05866211164864023	0.2222967622581374	0.13974492331869326	0.2831138425355407	0.0012283112420339315	0.14875861124508802	0.16390359962946865	0.1862906483370394	0.2913057483204526	0.1802225717461609	0.10615964187850332	0.08001097723725911	0.09201062686634792	0.1207463377465133	0.8061174888515756	0.2689774676299204	0.13516265028080585
375115	Diploid	Diploid	Diploid	Diploid	DAD3-synonymous_variant	Diploid	0.2237214558063556	0.031403910159305465	0.38490274611232106	0.04315036787864715	0.38134014106684105	0.0740123918462515	0.09006362258905397	0.035862006141598915	0.3711132124760637	0.033504224249105964	0.3822888791404075	0.0695057437096522	0.6264084892523687	0.0462799574434624	0.4165071067450306	0.039941002237413314	0.08150076232727615	0.03746070244351515	0.09008501862530764	0.047628313816376014	0.4995189514639119	0.04848678760108071	0.3645384679383963	0.037688747284189854	0.5060988457887012	0.057293880546748215	0.525577587709136	0.09402893893989986	0.47758163442717405	0.10695089243310173	0.6665160620825332	0.05390672442429195	0.9048300596983104	0.07118664792826	0.008425088901410567	0.11081243396173887	0.3028602875870981	0.04147283321840412	0.18366037910465502	0.06734066365811263	0.5542821799799594	0.04335852610131265	0.5293470315099378
379777	IRA2	missense_variant	Haploid	PKA	HCA4-synonymous_variant; YNL097W-A-missense_variant	IRA2	0.4701937028385156	0.022056129965350616	0.5804350122166936	0.027669850237822133	0.4633690572117175	0.03731437765884056	0.5842582920072881	0.023676327899140176	0.5370552180879815	0.026541934715880386	0.4639121015418268	0.053071836426508534	0.5963480161883493	0.030846882325042832	0.4956867292355726	0.031246625066043487	0.5809794989540741	0.023051098518989024	0.4053626611999202	0.032964806715691936	0.6289639062438381	0.03952955159566859	0.6323017811555475	0.029503295193366936	0.3305052112699822	0.05309904176472862	0.6397796432136578	0.034310909665673954	0.8316182010551062	0.051490682231971896	0.7374478274102073	0.04516520933073157	0.9670002493623728	0.0671665764322184	-0.009581922296609941	0.10447364624825027	0.4261761920516429	0.034131785319873466	0.3876948522279664	0.060643389118214874	0.7043696432395881	0.03704217798445635	0.5790316769943746
381707	other	other	other	other	nan-nan	other	0.06425886081591642	0.030346948211912868	0.13375520854774708	0.03895065158183973	0.3967025866430286	0.05461326654192376	0.19796433039699826	0.03356607227198366	0.0803541743901267	0.03623642364164883	0.10453096982775067	0.060977862615676434	-0.05085502712193128	0.038845363317281	0.06224050031429901	0.038840417775796936	0.15770491557747288	0.03348161283865572	0.1047085292952284	0.04465679826441598	0.11269935190999705	0.060745120410692015	0.0049927826387686745	0.046269151421840515	0.19498677931071615	0.06309949093980617	0.1786978665395492	0.09230907867022464	-0.08441157317040282	0.1140956011770228	0.29810185190642136	0.06851694930643275	0.6828234023766729	0.07846650744467835	0.07410671230673177	0.11837511315118325	-0.018015434389055958	0.03837581075243099	0.018325596364895898	0.06691179376701753	0.09584714884275332	0.07873670566866703	-0.007654504289705486
392361	Diploid	Diploid	Diploid	Diploid	None	Diploid	0.1839494157352253	0.029014085931455394	0.3198495046184624	0.03760107799015548	0.13873264137264807	0.06658988074809691	0.10291365284155914	0.031051526550933805	0.3006028702941143	0.032196286854038865	0.3863786831496343	0.059327509173091875	0.5546703432704849	0.038097398303534265	0.3994028946409789	0.03498919761992117	0.036910334931441365	0.03341509572504088	0.08276049712387798	0.04286268649830845	0.4354639364997544	0.04369666752014262	0.266566384204766	0.03487383003538511	0.40239450967043305	0.056838405653148426	0.3366544151707706	0.0940738609704332	0.44975293409692535	0.08776387970096554	0.4604596399522255	0.05421299048718328	0.7358184686441114	0.07060135975530926	0.012185193983460513	0.11004981846654772	0.2846248937299019	0.037136322887098665	0.189454415462722	0.06253046549878719	0.50960673399472	0.03914294461642105	0.4503779909243122
419648	other	other	other	other	nan-nan	other	-0.0983829702389092	0.04354624002286187	0.2268921692033843	0.05519167710306157	0.046237163817004205	0.11557642980108973	0.057450141654535325	0.049674618893081855	-0.02774321081243002	0.05556279821550178	-0.03763878982402183	0.0669863999261299	0.12598472410465136	0.044729392093287364	0.019881674128895063	0.039967352517383765	0.005959786438186103	0.054586933627113386	0.04303749512075279	0.06666893403587819	0.09122663502673728	0.07520888816412885	0.06514706211695577	0.062045897219254485	-0.08184690998865796	0.08775166575047258	0.13303487023609178	0.177302760490219	0.1760691465102408	0.16440803947629307	0.011134501069003232	0.098115222559457	0.038164245855722916	0.12284064584780555	-0.017538948617525026	0.142097883565705	-0.09514496927663878	0.05970286307583818	-0.05108620624055198	0.08664416321225972	0.06934316625968617	0.14603917133313524	0.09052072075325576
419831	Diploid	Diploid	Diploid	Diploid	IST1-upstream_point_variant; UBA3-missense_variant	Diploid	0.20268927081646385	0.03157458972977304	0.28764572016867873	0.04539493807712493	0.06227089387312509	0.07546210995900203	0.22632384188130544	0.0339314133980729	0.2783557306765703	0.03479812152106766	0.4673972237305217	0.056694953758307874	0.4262283347558576	0.03504508422197388	0.4470276150147442	0.0342173126134529	0.13774102696920065	0.036877715898741975	0.08584682692877506	0.04932672515253375	0.510133899320631	0.04924605617685173	0.319916067760668	0.03908107108780615	0.34887325843211026	0.060045658199034124	0.1713907660520092	0.10650837783106537	0.2197967461244821	0.10410809098793496	0.4451855342788033	0.06342310510781739	0.6761360818159137	0.07381523746645037	-0.1030367457790697	0.11980567197169492	0.3022381141370289	0.03740136480297385	0.2960050009163997	0.06457607857193957	0.5465006649869567	0.04642645243773428	0.5175986012461236
425471	Diploid	Diploid	Diploid	Diploid	AST2-synonymous_variant; RDH54-upstream_point_variant	Diploid	0.25143090830799075	0.030332396856586938	0.24287270466341246	0.044029761604426614	0.11099036173574202	0.07088332284803958	0.2668086656011465	0.03291844893698855	0.3045969286873591	0.03322314008010574	0.43031021357870297	0.05823790898021033	0.5055241899723684	0.036189075635758135	0.4979078108519027	0.03511107147891738	0.1400036830897346	0.03472716294234796	0.15485197253112154	0.04819816194341271	0.42519001704367415	0.05035493305427572	0.4014167800601115	0.036530341091302085	0.4467498681500429	0.05810213621577906	0.11176694477782706	0.1081047621172738	0.3781811044843813	0.08862344385050794	0.4879394469815209	0.05878414155855479	0.7263005581127577	0.07155499057068536	-0.00880617822151477	0.1153096899799661	0.26035314080552474	0.03675383555950268	0.3548842759031238	0.06349867577519096	0.5015672716718264	0.04332120834354695	0.5668619210356908
430247	other	other	other	other	nan-nan	other	0.016170763870597557	0.06018170572241425	-0.15127194058150828	0.09481718333888324	0.16867336716696898	0.15807351868090255	0.1580045636839902	0.0686669521345424	0.047937010149561435	0.06924627396146603	0.008659013060300737	0.07598746173422892	0.16478801101332746	0.054409225011356935	0.061060957534971726	0.04543906924577084	-0.049140075516354895	0.07895239799001769	0.023206354613811483	0.08847511989314677	0.059257331993764976	0.1030199889468888	0.0002041298545256512	0.08338267992907086	0.057366525924725326	0.09351125919897707	0.5274482408131945	0.19982947879801666	0.5093771696321002	0.26425417268532553	0.3859977015689714	0.12517005207805246	0.2863180342182435	0.1724495441296766	0.015376094436977385	0.1829648599160652	-0.08554007834183705	0.08577550322331577	-0.08446651083616571	0.12777827568523006	0.02701659137771385	0.1873854272483665	0.11241280958935593
434397	Diploid	Diploid	Diploid	Diploid	None	Diploid	0.2489925693063179	0.032771403572990014	0.24953393225718445	0.05273264819077657	0.1098349398343859	0.08548901366673765	0.1764499322606479	0.037843021617266194	0.3026382205590741	0.037130561133539915	0.5037634616304579	0.05546006792812062	0.4181670813809033	0.0338001461485748	0.4213180847037049	0.033676293144223754	0.039738134978098236	0.043446579864859385	0.13773490640486305	0.05453161121588662	0.497512902957903	0.05234067948896376	0.3200416785171024	0.042504603753334584	0.5025258072793924	0.061272523258966566	0.3794261895526293	0.11724593037705218	0.5114234967926714	0.10441193663101817	0.6195556444059404	0.05606751180434115	0.628295984642632	0.07555668853931573	-0.029970517475853744	0.1212433124525032	0.29502111461218256	0.03966562013935062	0.3231697091453664	0.06550208123614795	0.5692581764181279	0.045241769568211666	0.4927234149485492
454851	other	other	other	other	CDC11-upstream_indel_variant; PCA1-synonymous_variant; TRP5-missense_variant; YDL211C,tG-upstream_indel_variant	other	-0.024366611488049916	0.034690305268603394	0.0306965532475394	0.049607376489624135	-0.15019693392493008	0.0936954191962556	-0.011389692649621287	0.03883999385711371	-0.028786096179754268	0.042028563671126125	0.04861753365120833	0.0634042372859058	0.010449680897794621	0.041425401519419064	0.0222836926244471	0.03967458963891464	-0.1081249805358834	0.04321773558738827	-0.09144882343198467	0.054518152628801005	-0.163342718683624	0.07264015292623974	-0.010707666366084612	0.04997282901019032	0.026550343226300212	0.07216563447081535	0.08787948570586432	0.12926284463985233	0.030530508077023594	0.12932477117927715	-0.06268129277286298	0.07970234390292333	0.17527294298140894	0.09726826230043337	-0.1392804311431912	0.1233654873554424	0.08049834937470189	0.04327903808478554	0.01481968352528479	0.07155817656171995	0.16587558522378268	0.09152780893215112	0.13330793825595907
[truncated: 47 more columns]
