# Supplementary material for: Fitness variation across subtle environmental perturbations reveals local modularity and global pleiotropy of adaptation
Source: eLife. 2020 Dec 2;9:e61271. doi: 10.7554/eLife.61271 (PMC7880691; doi:10.7554/eLife.61271)
Supplement: Supplementary file 1. [file elife-61271-supp1.xlsx]

## Sheet: Sheet1
Mutation Type	Total Number	Number in Training Set	Number in Test Set
Diploid	188	20	168
Diploid w/ add’l mutation
Diploid + Chr11Amp	3	1	2
Diploid + Chr12Amp	1	0	1
Diploid + IRA1	1	0	1
Diploid + IRA2	3	1	2
High-fitness Diploid	11	5	6
IRA1
IRA1 nonsense	20	10	10
IRA1 missense	9	4	5
IRA1 other	1	0	1
IRA2	8	4	4
GPB1	4	2	2
GPB2	14	7	7
PDE2	11	5	6
Other Ras/PKA pathway
CYR1	3	1	2
TFS1	1	0	1
RAS2	1	0	1
TOR/Sch9 pathway
KOG1	1	0	1
SCH9	1	0	1
TOR1	1	0	1
Other Adaptive	7	0	7
Neutral	3	0	3
TOTAL	292	60	232
