# Supplementary material for: Fitness variation across subtle environmental perturbations reveals local modularity and global pleiotropy of adaptation
Source: eLife. 2020 Dec 2;9:e61271. doi: 10.7554/eLife.61271 (PMC7880691; doi:10.7554/eLife.61271)
Supplement: Supplementary file 2. [file elife-61271-supp2.xlsx]

## Sheet: Sheet1
Condition number (ordered by z-score)	Condition Name	Source	Number of barcoded clones	Batch Number	Number of replicates	Description of Manipulation
1	EC	This study	500	10	3	No preculture
2	EC	This study	4800	4	3	No barcodeless ancestor
3	EC	Li et al (2018)	4800	4	3
4	EC	This study	500	5	3	No preculture
5	EC	Venkataram et al (2016)	4800	1	3
6	EC	Li et al (2018)	4800	3	3
7	EC	Venkataram et al (2016)	4800	2	3
8	EC	This study	500	9	4
9	EC	This study	500	5	3
10	1.4% Gluc	This study	500	9	2	Decreased glucose concentration to 1.4%
11	12hr Ferm	Li et al (2018)	4800	3	3	Decreased transfer time to 44 hours and increased number of cells transferred to 2*10^8, resulting in ~12 hours of fermentation phase
12	1% Gly	This study	500	9	2	Added glycerol to a final concentration of 1%
13	1.8% Gluc	This study	500	9	2	Increased glucose concentration to 1.8%
14	0.5% Raf	This study	500	9	2	Added raffinose to a final concentration of 0.5%
15	8.5 μM GdA (B1)	This study	4800	1	3	Added Geldanamycin to a final concentration of 8.5 μM
16	8hr Ferm	Li et al (2018)	4800	3	3	Decreased transfer time to 40 hours and increased number of cells transferred to 8*10^8, resulting in ~8 hours of fermentation phase
17	Baffle (B9)	This study	500	9	2	Used baffled flask
18	Baffle (B8)	This study	4800	8	2	Used baffled flask
19	0.5% DMSO	This study	4800	1	3	Added DMSO to a final concentration of 0.5%
20	1% Raf	This study	500	9	2	Added raffinose to a final concentration of 1%
21	Baffle, 1.7% Gluc	This study	4800	8	2	Increased glucose concentration to 1.7%, used baffled flask
22	Baffle, 1.6% Gluc	This study	4800	8	2	Increased glucose concentration to 1.6%, used baffled flask
23	18hr Ferm	Li et al (2018)	4800	4	3	Increased transfer time to 50 hours and decreased number of cells transferred to 2.5*10^7, resulting in ~18 hours of fermentation
24	Baffle, 1.4% Gluc	This study	4800	8	2	Decreased glucose concentration to 1.4%, used baffled flask
25	2 μg/ml Flu	This study	500	9	2	Added Fluconazole to a final concentration of 2 μg
26	22hr Ferm	Li et al (2018)	4800	4	3	Increased transfer time to 54 hours and decreased the number of cells transferred to 6.25*10^6, resulting in ~22 hours of fermentation
27	3 Day	Li et al (2018)	4800	2	3	Increased transfer time to 72 hours (3 days)
28	17 μM GdA	This study	500	9	2	Added Geldanamycin to a final concentration of 17 μM
29	Baffle, 1.8% Gluc	This study	4800	8	2	Increased glucose concentration to 1.8%, used baffled flask
30	1 Day	Li et al (2018)	4800	2	3	Decreased transfer time to 24 hours (1 day)
31	1% EtOH	This study	500	9	2	Added ethanol to a final concentration of 1%
32	8.5 μM GdA (B9)	This study	500	9	2	Added Geldanamycin to a final concentration of 8.5 μM
33	1.5% Suc, 1% Raf	This study	500	9	2	Omitted glucose, added sucrose to a final concentration of 1.5% and raffinose to a final concentration of 1%
34	Baffle, 2.5% Gluc	This study	4800	8	2	Increased glucose concentration to 2.5%, used baffled flask
35	4 Day	Li et al (2018)	4800	2	3	Increased transfer time to 96 hours (4 days)
36	5 Day	Li et al (2018)	4800	6	3	Increased transfer time to 120 hours (5 days)
37	0.2 M NaCl	This study	500	9	2	Added NaCl to a final concentration of 0.2 M
38	0.2 M KCl	This study	500	9	1	Added KCl to a final concentration of 0.2 M
39	0.5 μg/ml Flu	This study	500	9	2	Added Fluconazole to a final concentration of 0.5 μg/mL
40	Baffle, 0.4 μg/ml Ben	This study	4800	7	2	Added Benomyl to a final concentration of 0.4 μg/mL, used baffled flask
41	Baffle, 2 μg/ml Ben	This study	4800	7	2	Added Benoyml to a final concentration of 2 μg/mL, used baffled flask
42	6 Day	Li et al (2018)	4800	6	3	Increased transfer time to 144 hours (6 days)
43	7 Day	Li et al (2018)	4800	6	3	Increased transfer time to 168 hours (7 days)
44	0.5 M KCl	This study	500	9	1	Added KCl to a final concentration of 0.5 M
45	0.5 M NaCl	This study	500	9	1	­­­­­­­­Added NaCl to a final concentration of 0.5 M
