# Supplementary figures and images for: Fitness variation across subtle environmental perturbations reveals local modularity and global pleiotropy of adaptation
Source: eLife journal article supplement (doi:10.7554/elife.61271), 2020-12-02

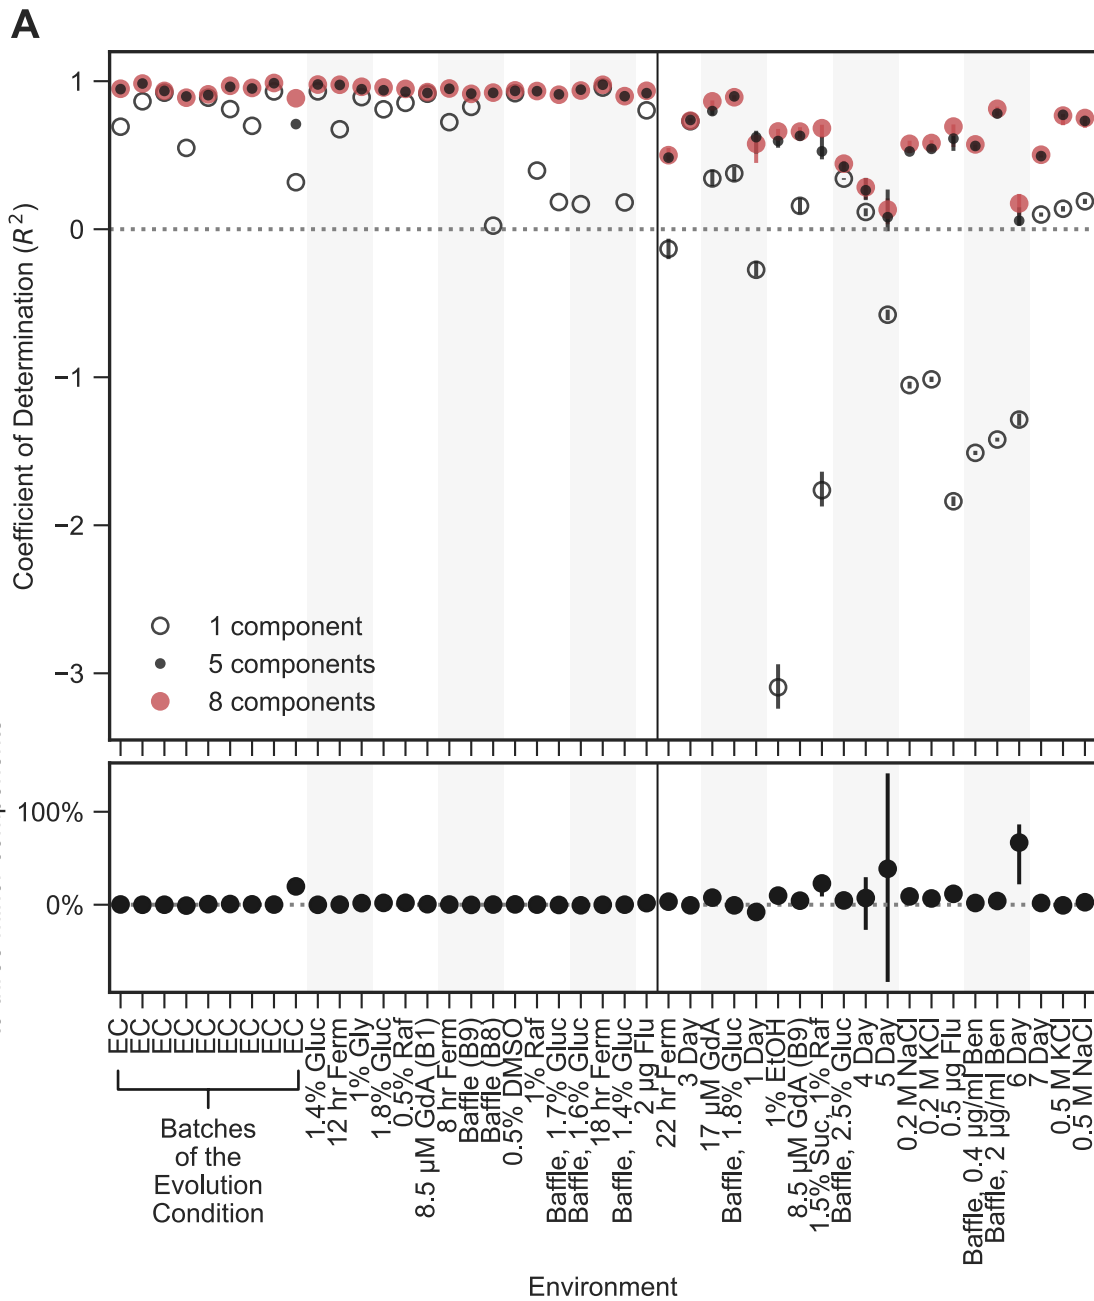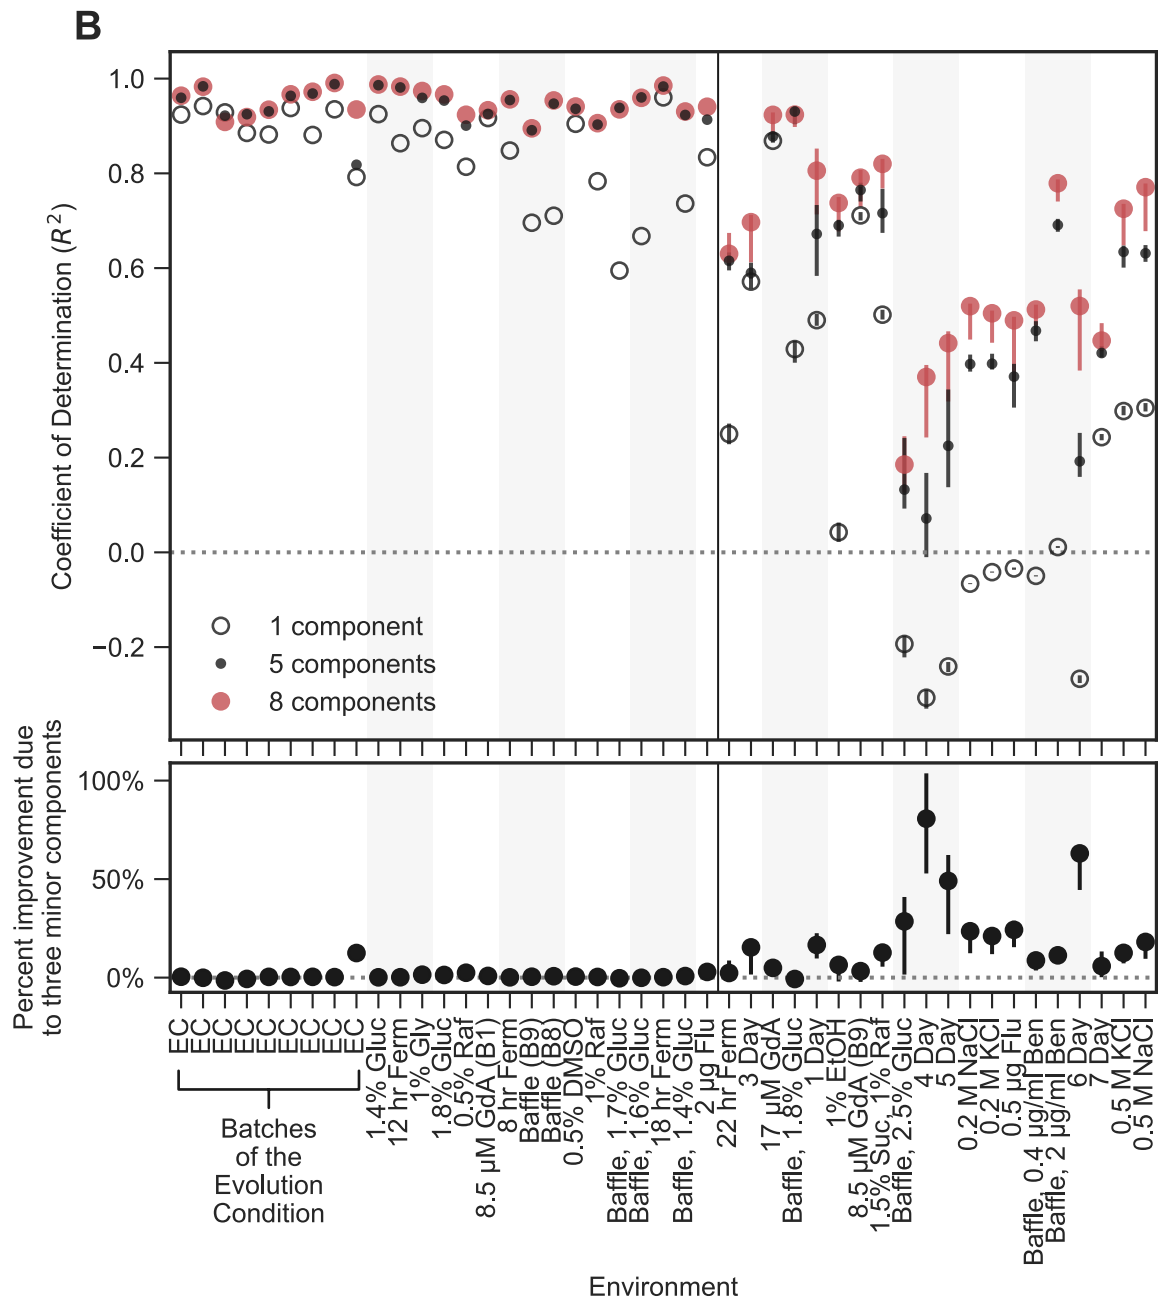

Supplement: supp [file elife-61271-supp-v1.zip]

Percent improvement due to three minor components

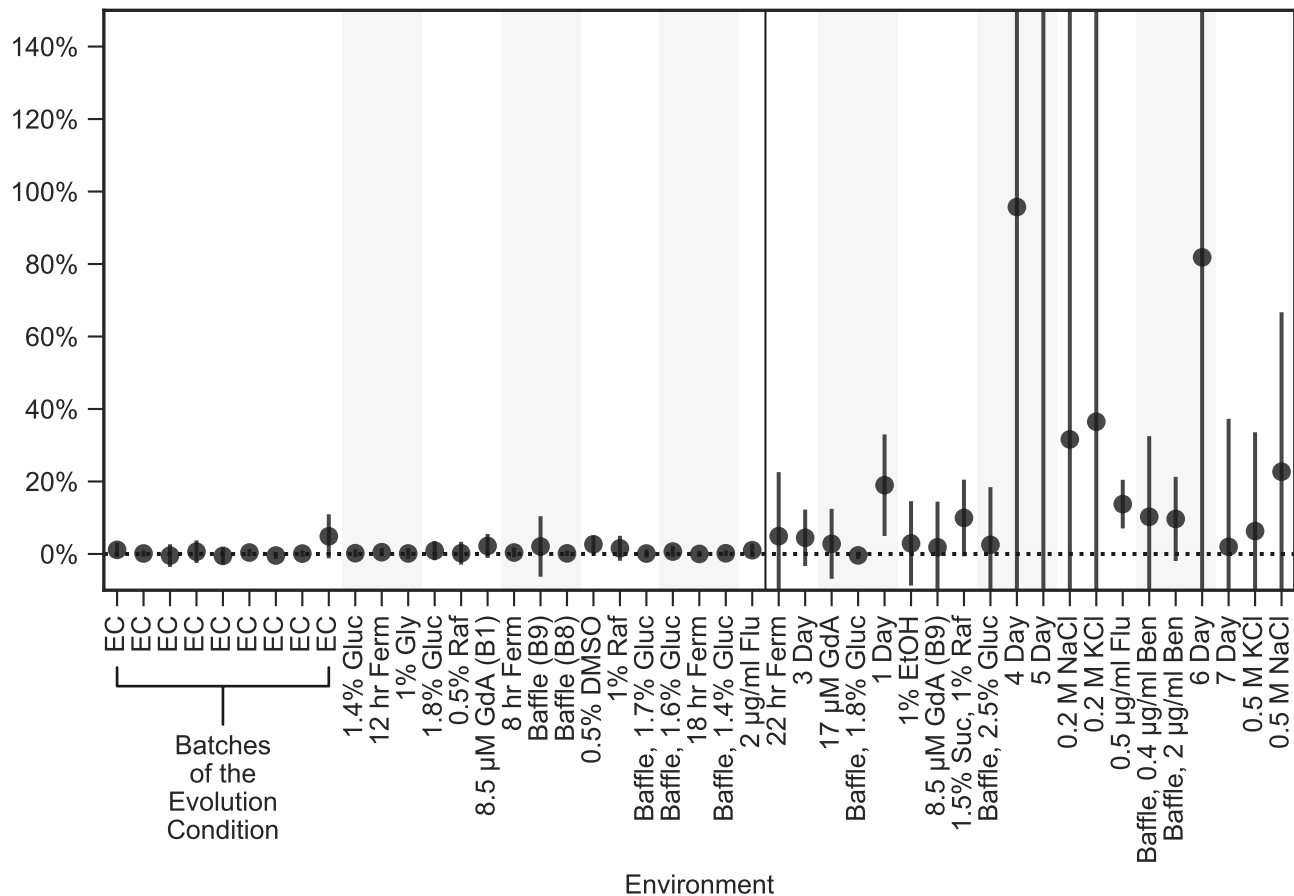

Supplement: supp [file elife-61271-supp-v1.zip]

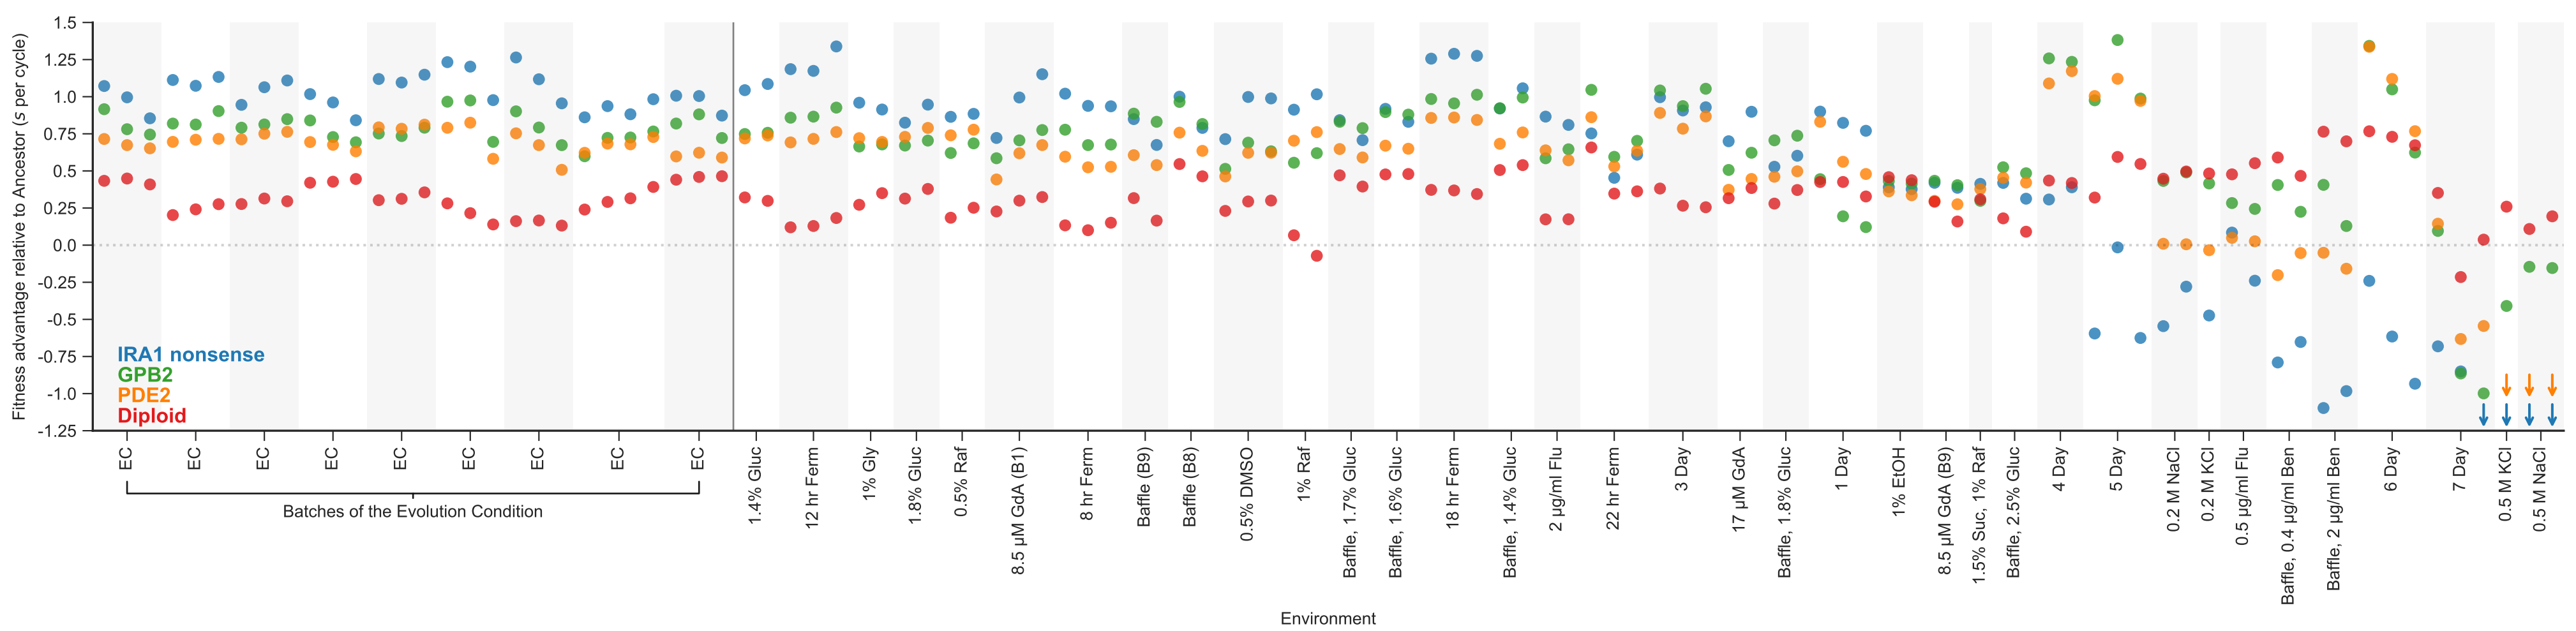

Supplement: supp [file elife-61271-supp-v1.zip]

**A**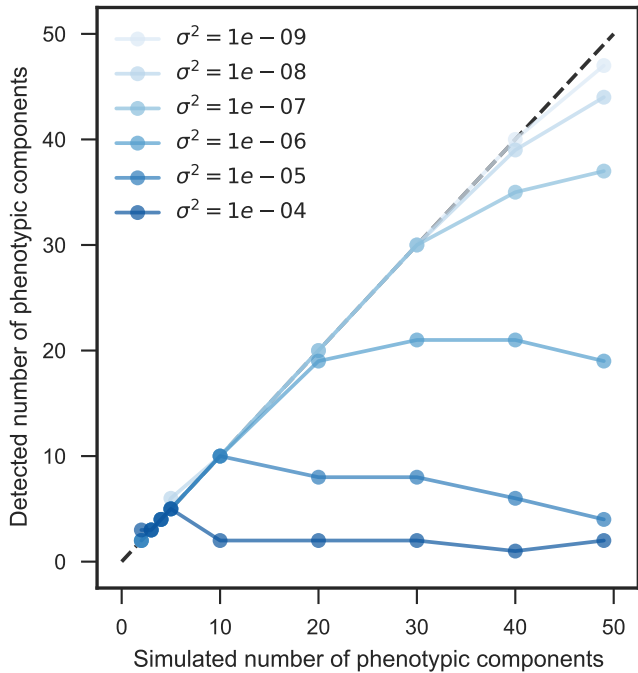**B**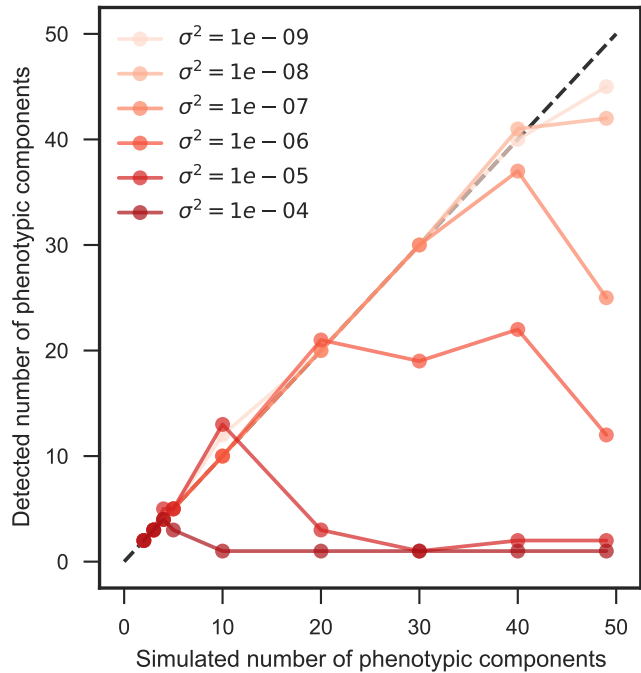

Supplement: supp [file elife-61271-supp-v1.zip]

**A**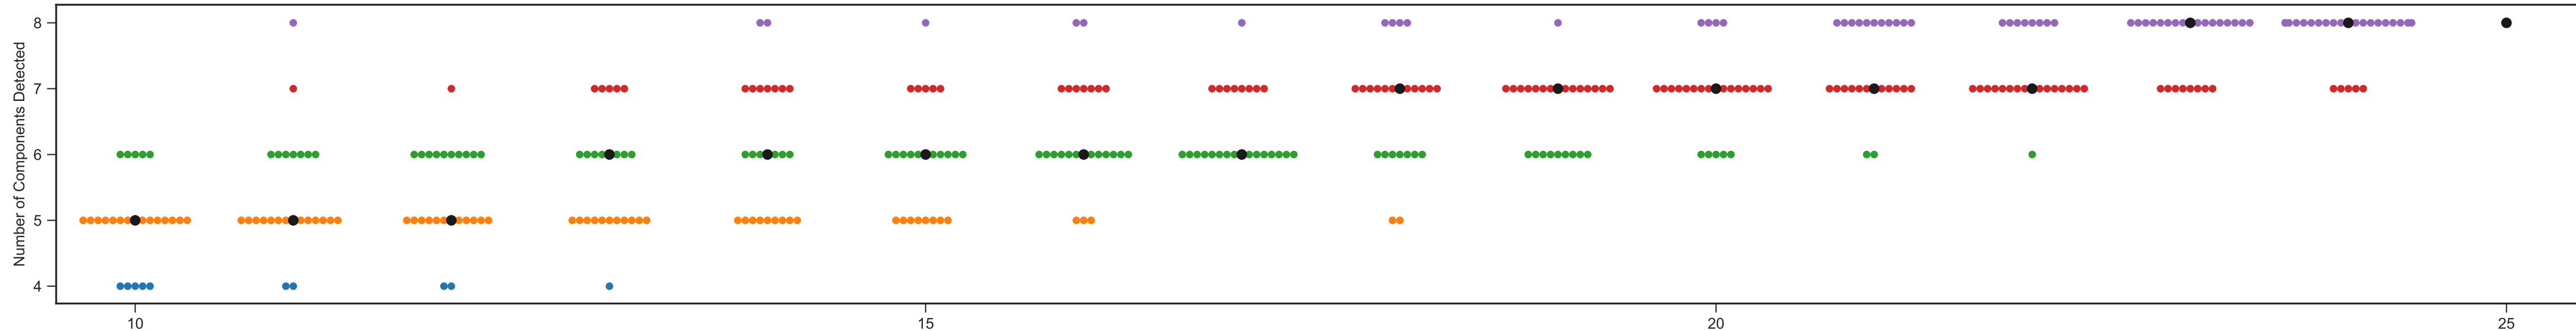**B**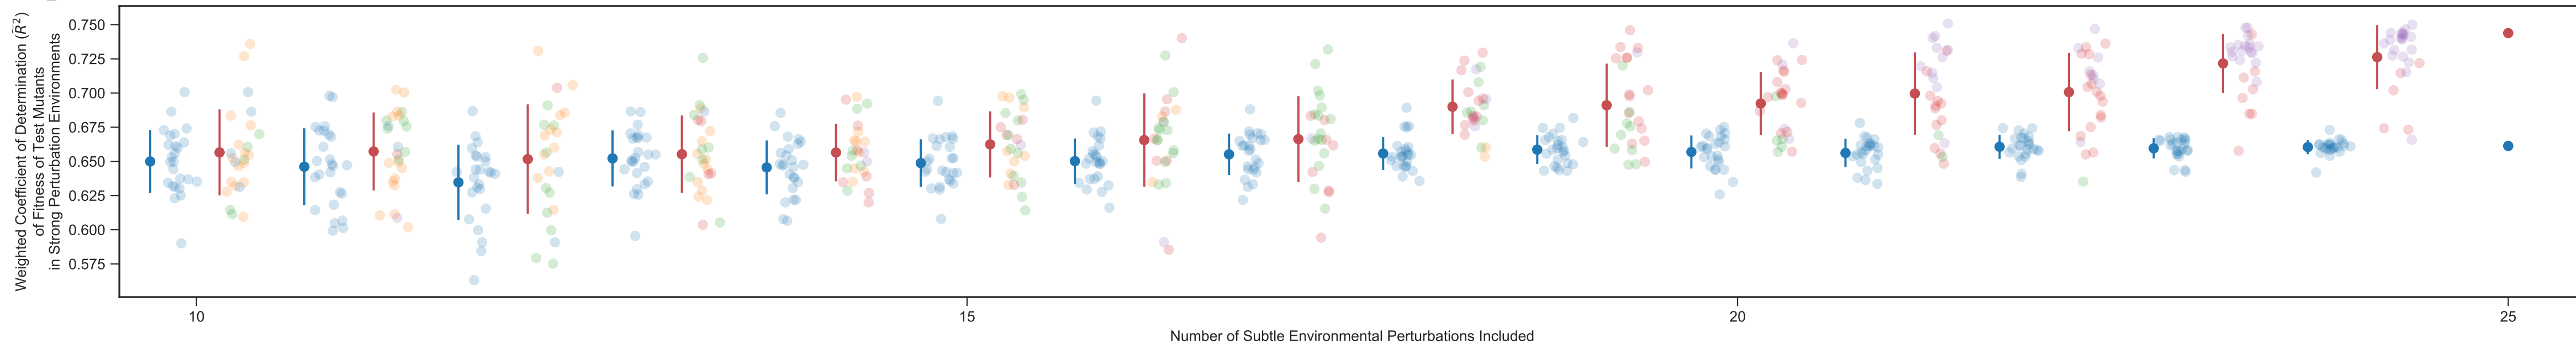

Supplement: supp [file elife-61271-supp-v1.zip]

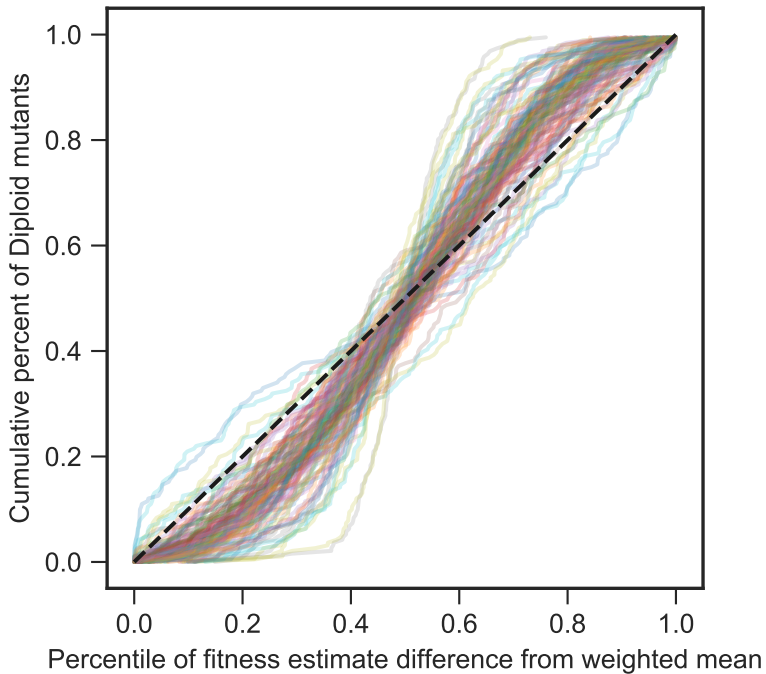

Supplement: supp [file elife-61271-supp-v1.zip]

**A**

Including first component

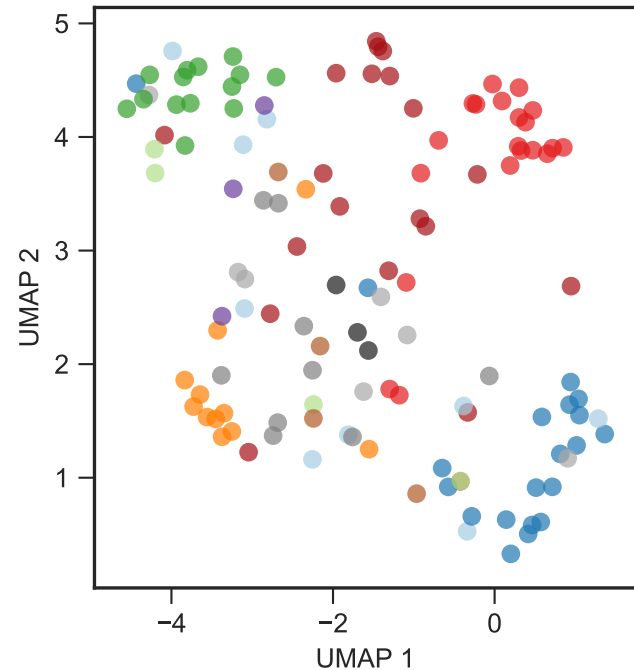**B**

Just 3 minor components

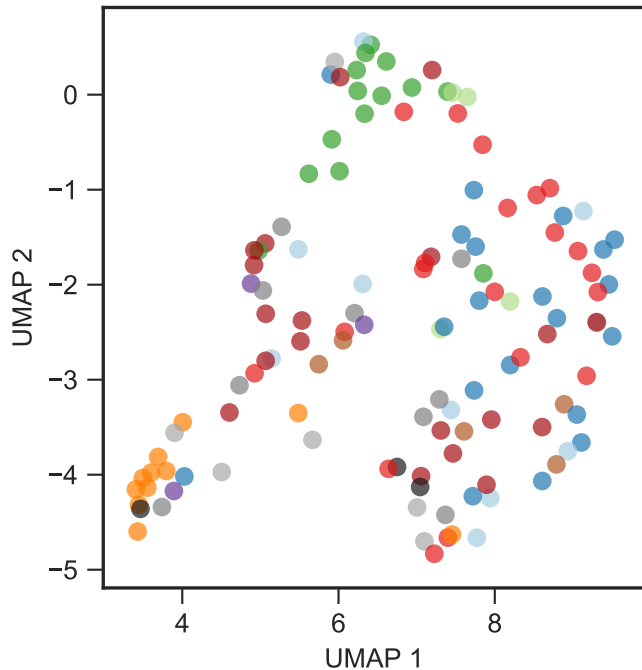

Supplement: supp [file elife-61271-supp-v1.zip]

**A**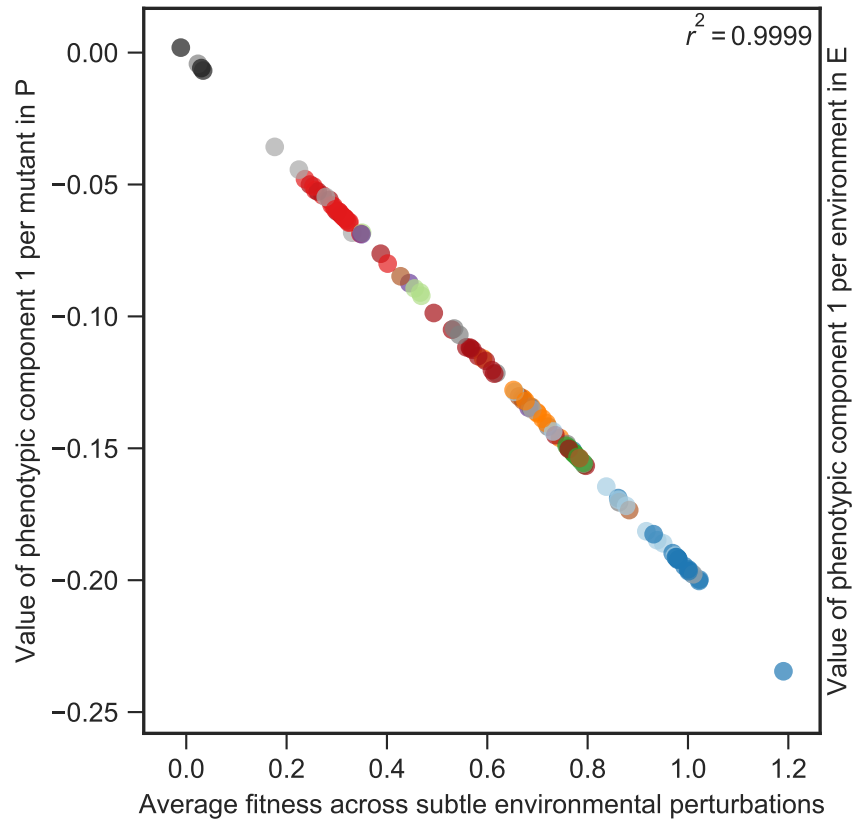**B**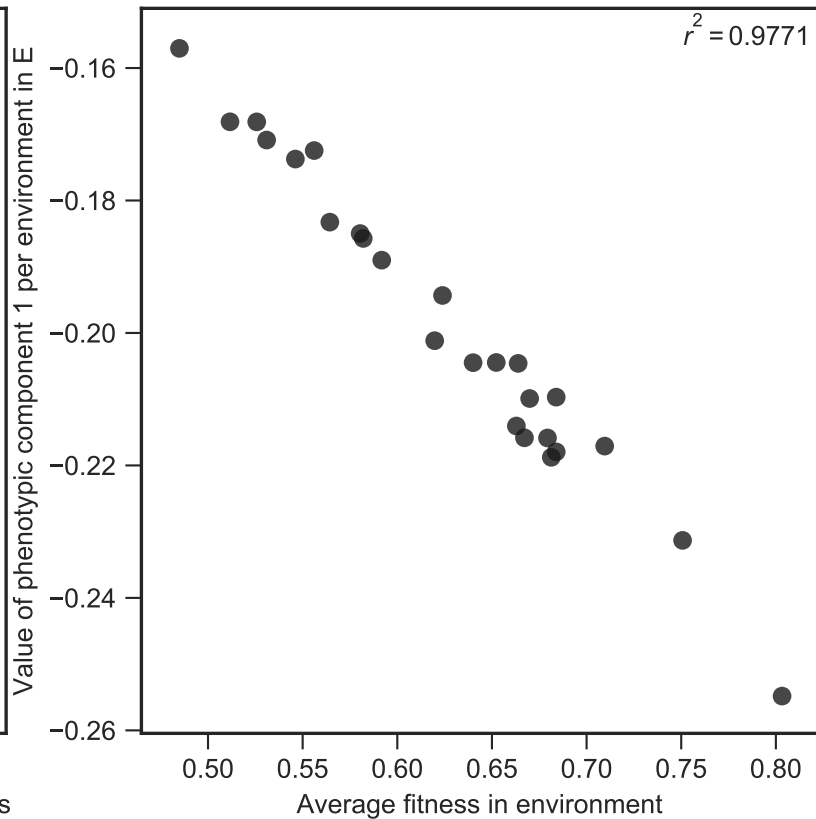

Supplement: supp [file elife-61271-supp-v1.zip]

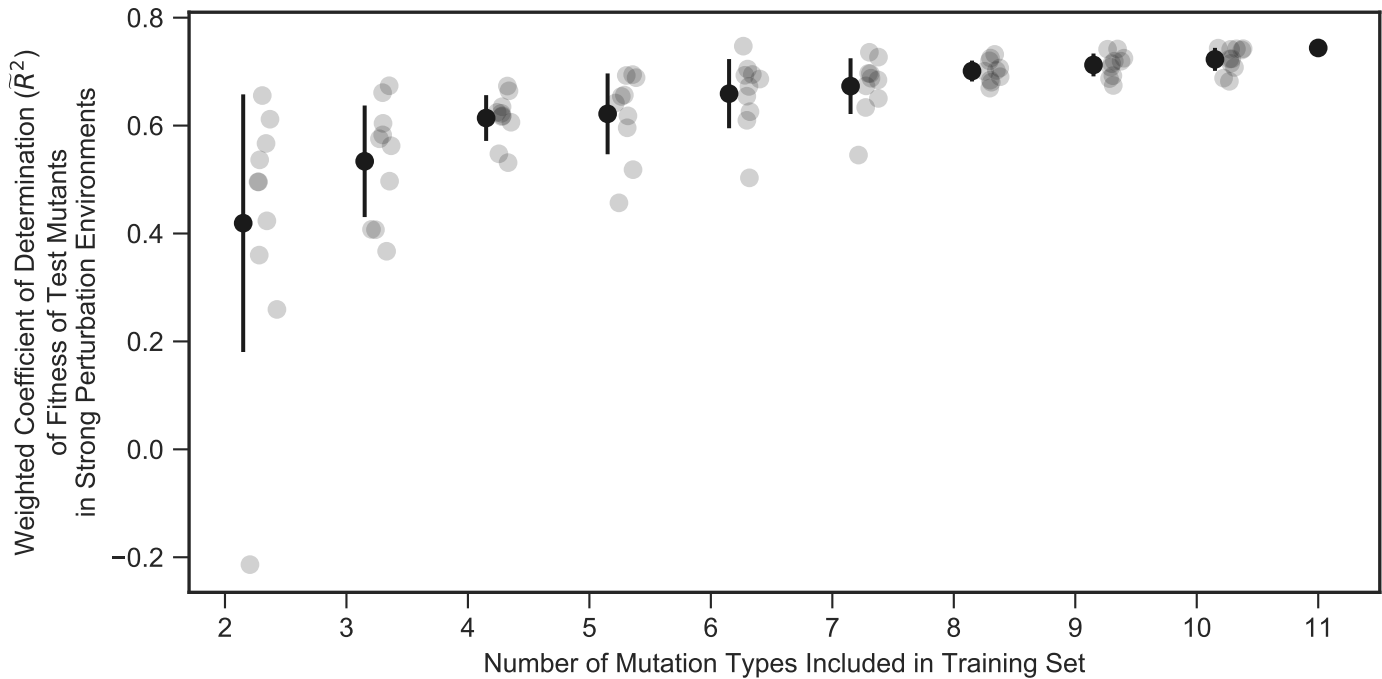

Supplement: supp [file elife-61271-supp-v1.zip]
